# Supplementary material for: UHRF1 is essential for proper cytoplasmic architecture and function of mouse oocytes and derived embryos
Source: Life Sci Alliance. 2023 May 24;6(8):e202301904. doi: 10.26508/lsa.202301904 (PMC10209520; doi:10.26508/lsa.202301904)
Supplement: Supplementary file 3 [file LSA-2023-01904_TableS1.xlsx]

## Sheet: TableS1
Table 1 Transcripts up-regulated in Uhrf1 KO FGOs.
Up-regulated transcripts (≥ 2.0, n = 159) are listed in the order of fold change. Expression levels are shown in Log2 (CPM + 4).
Gene symbol	Ensembl ID	Log2 fold change	FDR	Control_1	Control_2	Control_3	Control_4	Control_5	Control_6	Control_7	Control_8	Control_9	Control_10	KO_1	KO_2	KO_3	KO_4	KO_5	KO_6	KO_7	KO_8	KO_9	KO_10
Commd1b	ENSMUSG00000098650	23.2757	2.49e-13	2	2	2	2	2	2	2	2	2	2	2	8.51007	2	2	2	2	2	8.87107	2	8.27982
A930015D03Rik	ENSMUSG00000092368	13.1037	9.53e-86	2	2	2	2	2	2	2	2	2	2	10.5012	10.6969	10.3931	10.8349	10.786	10.5354	10.8921	9.96114	10.7954	10.9829
Spesp1	ENSMUSG00000046846	9.51149	7.42e-54	2	2	2	2	2	2	2	3.30419	2	2	8.5051	8.88938	8.86753	8.84438	8.60077	8.87501	8.65127	8.37534	9.12736	8.92328
Gm35239	ENSMUSG00000112412	7.55312	8.07e-17	2	2	2	2	2	2	2	2	2	2	5.60023	5.1892	2	4.75866	5.55851	5.75913	5.78224	4.54214	5.54039	5.43645
Pknox2	ENSMUSG00000035934	6.51341	2.27e-88	2	2	2.76559	2	3.06683	3.24871	2.57409	2.57513	3.4172	2	8.17426	7.81309	7.62222	7.47566	7.75301	7.73766	7.72244	7.95677	7.52539	8.00116
Ccn2	ENSMUSG00000019997	6.13677	4.13e-08	2	2	2	2	2	2	2	2	2	2.56357	2	4.60304	5.20523	2	4.56094	4.49055	3.9286	5.21862	4.99939	5.06517
Hcn1	ENSMUSG00000021730	5.96702	5.67e-05	2	2	2	2	2	2	2	2	2	2	2	3.49939	5.84964	2	3.56578	4.49055	2	2.85127	4.21358	3.78933
Cyp17a1	ENSMUSG00000003555	5.9032	5.64e-09	2	2	2	2	2	2	2	2.79471	2	2	4.39197	5.08949	5.5093	3.13855	3.39706	4.79491	2	4.99436	4.78182	4.86351
Coch	ENSMUSG00000020953	5.88906	1.21e-07	2	2.60616	2	2	2	2	2	2	2	2	4.64624	4.21862	5.64026	3.86533	2	4.31032	4.11009	2	4.72188	4.49573
Tnfrsf1b	ENSMUSG00000028599	5.76962	2.09e-11	2	2	2	2	2	2	2	2	3.25835	2	5.05025	3.693	4.52623	6.01258	4.71246	5.32478	3.60471	5.17647	5.18842	4.91663
Prss23	ENSMUSG00000039405	5.76482	5.4e-12	2	2	3.11554	2	2	2	2	2	2	2	4.21467	4.28021	5.33464	4.12581	5.19664	4.43293	4.41626	5.90087	5.57468	4.80836
Gm44503	ENSMUSG00000089865	5.71472	0.00357	2.36497	2	2	2.34592	2.28566	3.38166	2	2.31604	2	2	4.59884	2.68623	2	5.94665	2	2	8.69101	2	2	6.11911
Pnpla3	ENSMUSG00000041653	5.56309	0	3.59214	4.75365	4.17002	4.34039	4.78911	4.22346	4.61631	4.92837	5.22548	5.07172	10.2626	9.77378	9.94227	9.85765	9.95423	9.9874	9.91204	10.0278	9.83977	9.99964
Nfam1	ENSMUSG00000058099	5.43098	1.56e-90	2	3.74412	2.76559	4.26106	3.3407	3.10226	3.43861	3.56524	2	2	8.19831	7.92338	8.00906	8.05239	7.66285	7.87378	7.92385	7.47317	7.72942	7.54172
P3h2	ENSMUSG00000038168	5.40266	0.00181	2	2	2	2	2	2	2	2	2	2	2	3.39188	3.44951	2	3.71681	2	3.8285	5.41266	2	3.39928
Mt1	ENSMUSG00000031765	5.39924	3.81e-61	4.9299	4.13563	7.01209	4.74204	5.04016	5.01985	4.22205	5.49648	5.81628	4.3398	10.9667	10.5846	10.4665	10.437	10.5104	10.7108	10.4303	10.7867	10.3234	10.7819
Gm50271	ENSMUSG00000117927	5.33834	2.16e-11	2	2	2	2	2	2	2.57409	2	2	2.96779	4.90193	4.60304	4.81947	5.34087	3.9784	4.43293	4.54799	5.76526	3.26263	5.01733
Slc38a3	ENSMUSG00000010064	5.11069	0.000336	2	2.83455	2	2	2	2	2	2	2	2	4.15038	2	4.77455	2	3.85353	3.46465	4.11009	2	5.50526	3.39928
Gm13228	ENSMUSG00000082352	4.86596	1.87e-31	2	2	2	3.53442	2.28566	2.29793	2	2	3.25835	2.96779	5.73785	5.76422	5.56312	5.75453	6.08828	5.89333	6.15713	5.79342	5.50526	5.87258
Insyn1	ENSMUSG00000066607	4.77874	4.03e-05	2	2	2	2.34592	2	2	2	2	2.87604	2	3.68953	4.78404	4.86303	2	2.98563	3.94858	4.34559	3.98124	2	3.89898
Abcb11	ENSMUSG00000027048	4.52605	4.98e-05	4.15517	2	2	4.74204	4.69468	2	2	2	2	2	7.45588	5.76422	7.25624	6.93354	8.01596	5.35612	6.55181	6.81101	7.47181	7.62387
Sfrp4	ENSMUSG00000021319	4.50237	5.1e-12	2.656	2	4.72257	2	3.06683	3.61562	2.79337	2	2	2	6.2637	7.05663	7.26439	5.50255	6.61615	6.09252	5.19619	7.00412	6.74134	6.90365
Gm41386	ENSMUSG00000116190	4.38449	5.33e-07	2	2	2	2	2	2	2	2	3.56028	2	4.64624	4.74087	4.08607	4.65238	4.63869	3.77397	4.11009	3.38304	4.37795	3.39928
Olfr147	ENSMUSG00000049098	4.35045	0.00113	2	2	2	2	2	2	2.79337	2	2	2	2.4902	3.59944	2	2.56622	3.71681	3.46465	2	3.2266	4.59397	4.26942
Draxin	ENSMUSG00000029005	4.09013	1.86e-83	4.24552	5.09961	3.63235	5.88938	5.151	4.84666	4.49648	4.14689	4.51943	5.36729	8.75796	8.52287	8.84598	9.1033	8.82104	9.06477	8.52505	8.73974	8.67682	8.46506
Gm4989	ENSMUSG00000085066	3.91634	7.32e-08	2.36497	2	2.76559	2	2	2	2	3.30419	2	2	3.93828	2.85767	4.471	4.53764	4.63869	4.1763	4.34559	4.24866	4.29811	4.34887
Phyhip	ENSMUSG00000003469	3.88859	0.00341	2	2	2	2	2.90755	2	2	2	2	2	3.49615	4.08693	2.72175	2	3.85353	3.67805	2	3.87982	3.0837	2.86303
Myocd	ENSMUSG00000020542	3.82307	1.62e-27	5.13291	4.75365	5.43307	5.80799	5.90821	5.58621	6.46048	4.43519	5.66615	5.7724	9.40542	8.30309	8.35634	8.00459	8.81268	9.00672	9.26534	10.8509	9.22505	9.5183
2610016A17Rik	ENSMUSG00000101089	3.72591	0.00081	2.656	2	2.55258	2	2	2	2	2	2	2	3.59608	3.693	2.72175	4.12581	2	2.91072	2.82008	3.52417	2.35599	3.24169
Dpep1	ENSMUSG00000019278	3.66167	0.00895	2	2	2	2	2	2	2	2.57513	2	2	2.68434	2	3.44951	2	2.98563	2.28688	2.59487	3.2266	3.92549	2.62845
Aadacl3	ENSMUSG00000078507	3.46571	5.4e-08	3.10528	2	2.76559	2	2	2	2	2	3.4172	3.13409	5.08506	4.78404	4.0106	4.65238	4.71246	4.49055	5.07037	4.89389	4.02805	3.54134
Hemk1	ENSMUSG00000032579	3.37316	0.00929	2	2	2.55258	2	2	2.75544	2	2	2.87604	2	2	4.69637	3.84668	4.0441	4.09332	2	3.60471	3.52417	3.69551	2
Lhcgr	ENSMUSG00000024107	3.19345	2.16e-05	2	2	5.26815	2.85829	3.76918	4.07428	2.79337	2	2	3.76111	4.90193	7.07413	6.37099	4.41299	5.59798	6.53727	4.19294	6.92995	6.44029	6.20702
Gm37981	ENSMUSG00000103137	3.17726	2.2e-17	3.28644	3.03168	2.76559	2.34592	3.21025	2.75544	2.57409	2.57513	2.87604	2.77979	4.69213	4.69637	4.63074	5.07894	5.4332	5.26	5.02586	4.89389	5.73488	4.49573
Zfp990	ENSMUSG00000078503	3.01186	2.91e-114	6.09759	6.24913	5.97281	6.37713	6.00975	5.76724	5.77687	6.27561	5.69745	6.16721	9.03888	8.6391	8.77934	8.88014	8.94098	9.51346	9.12206	9.04512	8.49181	9.17018
Nlrp10	ENSMUSG00000049709	2.91602	7.72e-12	3.44737	2	3.73705	3.39274	2	3.50338	3.67778	2.79471	3.69044	3.8594	5.67068	5.60484	5.27139	4.99445	6.14267	5.38678	5.07037	6.78319	5.23204	5.24206
Qpct	ENSMUSG00000024084	2.8889	0.000219	2	3.35986	3.51945	2	3.3407	2	2	2	2	4.0379	4.94046	4.74087	5.23869	4.20314	4.47876	5.63689	4.66869	4.66916	3.0837	5.19983
Epcam	ENSMUSG00000045394	2.88441	1.04e-15	4.05879	2	4.37861	3.66343	3.94356	4.1508	5.14076	3.44061	4.58784	4.19673	6.81306	7.37164	6.07011	6.82764	7.05944	5.29275	6.58286	6.48815	6.44029	7.13417
Tnfrsf19	ENSMUSG00000060548	2.71897	9.36e-12	5.03497	3.8524	4.17002	2	4.17102	4.59608	3.67778	4.56026	4.77554	4.3398	7.26413	5.25204	6.90673	7.08423	7.86239	5.73549	6.05009	6.60399	6.51283	6.22818
Hoxd8	ENSMUSG00000027102	2.68796	0.000424	3.10528	2.60616	4.56082	2	2	2.75544	4.72695	2	2.87604	2	5.69342	5.69806	4.57943	4.7065	4.29887	5.84997	4.0222	5.08828	5.93293	5.70153
Gm8210	ENSMUSG00000094497	2.62891	6.79e-139	6.1453	6.05883	6.39701	6.2182	6.12286	6.09227	6.25425	6.10131	5.66615	5.72104	8.96838	8.80807	8.45927	8.51349	8.495	8.51093	8.81061	8.60322	8.68469	8.55156
Tcf21	ENSMUSG00000045680	2.54202	0.00217	2.89806	2.83455	2.55258	2.62473	2	2.93925	2	2	2.63866	2	2.68434	4.28021	3.93097	3.13855	4.39162	3.07037	2.59487	4.945	2.35599	3.78933
Gm9728	ENSMUSG00000106248	2.5406	2.55e-05	2.656	2.83455	3.11554	2.62473	2.28566	2	2.31542	2	2.87604	2.30913	3.93828	3.942	4.15779	3.66124	4.19975	4.37293	3.33971	4.24866	2.6413	3.24169
Myl9	ENSMUSG00000067818	2.50266	0.00556	2	2	3.83467	2	3.859	2	2	2	3.25835	2	4.39197	4.60304	4.471	3.28802	4.39162	4.65074	3.47829	4.47418	3.92549	4.26942
Gm28578	ENSMUSG00000100417	2.48125	1.02e-94	6.95124	7.33721	6.6459	7.60553	7.68876	7.50051	7.28991	6.81684	7.11652	7.26741	10.0278	9.85699	9.77988	9.6175	9.6717	9.69136	9.46398	9.3713	9.68749	9.80031
Klhl31	ENSMUSG00000044938	2.38867	4.14e-05	2	2.60616	3.63235	3.53442	2	3.10226	4.67269	4.06482	4.29225	3.13409	4.0125	4.21862	5.36526	6.35515	4.71246	6.50967	5.27437	5.44852	5.64091	5.19983
Zbed6	ENSMUSG00000094410	2.27395	9.74e-05	6.42206	7.7268	7.17937	5.96642	5.60492	7.20996	5.52456	5.43247	6.23422	6.42965	7.67738	6.83853	9.89976	6.7265	9.84161	7.80733	5.86036	7.09743	9.78956	9.73527
Gm10800	ENSMUSG00000075014	2.24908	1.1e-05	5.86087	5.1429	7.33759	5.23263	5.82149	6.05294	5.99156	5.99452	6.80782	7.21268	7.16185	7.50661	9.52071	7.13444	7.58643	9.1961	6.79663	7.20617	10.1818	8.08476
Gm13147	ENSMUSG00000087207	2.24352	1.29e-43	5.91693	5.67237	6.13489	5.49781	5.57872	6.18616	5.3965	6.20073	4.9416	5.79741	7.66593	7.64767	7.58368	7.73849	8.16792	8.09884	8.09517	7.88006	7.92816	8.40592
Rsc1a1	ENSMUSG00000040715	2.24309	6.27e-07	3.44737	6.91854	5.71528	5.96642	5.99001	3.24871	4.61631	5.52745	6.02807	3.13409	7.48876	6.46694	8.19951	7.33673	7.82961	8.06606	7.64363	7.47317	7.93478	7.70159
Pde7b	ENSMUSG00000019990	2.17854	1.4e-08	5.94416	5.98938	5.86141	4.6824	5.65594	6.56736	6.11876	6.47942	6.57485	5.72104	8.97535	6.53168	7.20638	7.22992	8.02323	5.68703	8.64025	9.31413	7.66721	8.67231
Ttll12	ENSMUSG00000016757	2.15649	3e-117	6.27966	6.58357	6.63239	6.61904	6.40222	6.40502	6.49215	6.41463	6.25541	6.42965	8.80309	8.424	8.7593	8.56567	8.47395	8.50395	8.30527	8.55879	8.76856	8.35391
Slc15a1	ENSMUSG00000025557	2.11393	0.000371	2	5.26548	3.83467	2	4.42741	4.42177	4.55764	2	3.80982	3.8594	6.35211	5.84797	5.78317	6.07563	5.29597	4.65074	5.69965	4.99436	6.44029	5.9763
NA	ENSMUSG00000094977	2.10284	5.38e-05	2.36497	2.33468	2.30259	2.34592	3.21025	3.50338	2.57409	2.57513	2.35439	2.30913	3.86004	3.942	3.93097	4.27653	3.71681	3.94858	3.33971	3.65271	3.69551	3.54134
Sdr9c7	ENSMUSG00000040127	2.07866	0.00128	3.28644	2	3.11554	2	3.3407	3.61562	2	2	2.87604	3.28319	4.0125	4.28021	3.75716	3.86533	2.98563	3.77397	4.0222	5.08828	4.8947	4.26942
Wt1	ENSMUSG00000016458	2.06645	0.00586	3.7237	3.62705	4.82114	2	3.21025	3.10226	4.22205	2.98523	3.25835	3.13409	2.85542	5.05467	5.17098	5.62	5.38889	7.01075	2	4.47418	3.81508	5.36181
Isg20	ENSMUSG00000039236	2.03707	0.000535	3.10528	3.20508	3.83467	3.23561	4.74267	4.07428	3.88287	2	3.69044	2	5.24754	5.45263	6.29351	5.64793	5.34318	4.24486	5.67104	4.60705	3.69551	3.89898
Col1a2	ENSMUSG00000029661	1.96376	0.000165	3.7237	2.60616	5.30267	2.85829	5.25393	3.50338	3.78396	4.67536	3.92008	4.3398	6.06876	6.65307	6.1426	3.76689	5.51794	5.61114	4.83269	4.99436	6.36391	7.12291
Itih5	ENSMUSG00000025780	1.94744	0.00441	2	2	5.55265	4.6824	4.64504	5.09923	2	3.44061	3.80982	4.1195	5.69342	6.28358	5.89231	4.41299	4.63869	5.80526	5.55054	6.39932	6.84332	6.09627
Fgd3	ENSMUSG00000037946	1.94508	4.84e-18	5.94416	5.1429	5.36935	5.86275	5.68078	5.81504	5.32794	6.03819	6.10011	4.75168	7.60126	6.66466	6.61982	7.76423	7.6905	7.96806	7.37753	8.0531	7.49885	7.22119
Gm10801	ENSMUSG00000075015	1.91682	0.000121	3.84425	3.8524	5.58106	3.89127	4.09911	4.89195	4.43261	4.67536	5.22548	5.52535	5.08506	5.60484	7.53738	5.19706	6.03177	7.1243	4.83269	5.29939	8.09693	5.76083
Tcf15	ENSMUSG00000068079	1.87978	6.54e-05	2.89806	2.60616	4.72257	4.17712	2	4.35865	3.78396	3.88518	4.11813	4.40634	5.73785	5.45263	6.22838	5.15875	4.09332	5.22648	6.13635	4.89389	5.46926	5.19983
Snai2	ENSMUSG00000022676	1.87836	0.0054	2	2	3.11554	3.89127	2.72848	3.10226	3.43861	2	3.25835	2	3.7773	3.14936	4.15779	3.76689	4.39162	4.1763	4.34559	3.2266	3.92549	4.96786
Gm11942	ENSMUSG00000094344	1.86738	1.65e-21	5.50623	6.59919	6.47477	5.05588	5.9291	5.90615	5.87625	6.4635	5.18188	6.4613	7.98907	7.9137	7.84496	7.31076	8.16135	7.83539	7.80377	7.52447	7.81797	8.05546
Snora9	ENSMUSG00000064513	1.85258	0.00423	2.89806	2.33468	2.30259	3.23561	2.52399	3.38166	2.98367	2.98523	2	2	3.68953	4.28021	4.0106	2.78321	4.09332	3.46465	3.8285	3.98124	4.21358	2.34818
Tbkbp1	ENSMUSG00000038517	1.82785	0.00744	2.89806	2.83455	2.55258	2	3.21025	2.54475	2.79337	3.15351	2	2	4.15038	4.15427	4.52623	2.56622	3.39706	3.07037	3.47829	3.2266	3.26263	3.24169
Gm7201	ENSMUSG00000114263	1.81453	9.46e-44	6.40256	6.56777	6.19126	7.06675	6.50319	6.29131	6.29074	6.21982	6.80782	6.9703	8.54316	8.10881	8.65164	8.39078	8.14145	8.01789	8.42149	8.43018	8.1828	8.28488
Bmp7	ENSMUSG00000008999	1.76611	0.000658	4.24552	4.29763	4.868	3.23561	4.87774	4.6498	6.69632	4.56026	5.38779	4.89761	5.27795	7.32124	4.15779	7.62364	5.59798	6.16508	7.11612	5.37588	6.93856	7.59157
Grb14	ENSMUSG00000026888	1.76088	0.00448	4.05879	4.29763	5.88439	2	3.57079	4.1508	2	5.25879	5.42566	4.27004	6.33774	6.48012	6.5942	3.66124	5.94261	5.89333	5.51877	6.57183	6.15315	6.38718
Bik	ENSMUSG00000016758	1.75161	4e-17	5.46921	6.30737	6.09604	6.08633	6.12286	6.55333	4.67269	5.14357	5.38779	6.0049	7.309	7.55102	7.38135	7.53669	7.30575	7.53353	7.56027	7.59817	7.59387	8.13044
Pramel11	ENSMUSG00000078512	1.66947	0.00957	2.89806	3.20508	2	2	2.90755	3.50338	2	2.79471	3.07982	2	3.38878	3.59944	3.05795	3.76689	4.29887	3.67805	3.8285	3.87982	3.26263	3.39928
Sycp3	ENSMUSG00000020059	1.64862	5.09e-23	7.65027	6.95543	7.44968	6.90654	7.26464	7.26263	6.82627	6.8782	7.53563	7.41207	8.85192	8.94986	9.04822	8.34032	9.25979	7.80733	8.85263	8.84103	9.23044	8.949
Gstm2	ENSMUSG00000040562	1.6283	0.00853	4.81658	2	5.66308	2	4.17102	4.29264	3.67778	3.67995	4.71565	3.41831	5.30774	6.26846	5.95404	4.47666	5.03351	6.0356	3.8285	6.30466	5.76489	5.57507
Gm17205	ENSMUSG00000075469	1.5997	1.35e-06	3.28644	3.62705	3.73705	3.23561	4.64504	3.24871	3.30231	3.30419	3.25835	3.65564	4.90193	5.34144	4.52623	4.7065	5.29597	4.49055	4.41626	4.89389	4.99939	4.69131
Gm4322	ENSMUSG00000100690	1.59793	0.00816	2.36497	2	3.51945	2.34592	2.72848	2.29793	3.43861	2.57513	2.87604	3.13409	3.38878	3.693	3.33042	3.66124	3.56578	3.86392	3.33971	4.89389	3.26263	3.39928
Hmgn3	ENSMUSG00000066456	1.58091	0.00294	4.05879	5.00893	3.73705	3.23561	5.68078	5.6135	5.67014	4.22454	5.22548	4.0379	4.82163	7.28414	7.07362	5.92399	4.19975	5.87182	7.41252	4.24866	6.36391	6.24904
NA	ENSMUSG00000093893	1.55938	2.85e-06	8.38069	8.48402	8.16402	8.34829	9.76669	9.84357	8.23436	8.2699	7.75233	7.19397	10.9253	10.3263	10.4388	10.0294	10.2016	10.1527	10.1036	10.4599	9.64374	9.28068
NA	ENSMUSG00000094751	1.53644	1.27e-06	8.42969	8.49241	8.25058	8.45463	9.71501	9.82909	8.30741	8.38429	7.93413	7.2494	10.9337	10.2931	10.437	10.0452	10.2674	10.1857	10.1129	10.4763	9.65781	9.22385
Gm49869	ENSMUSG00000117054	1.53556	2.34e-10	3.7237	5.05499	4.44194	5.39007	4.02343	4.29264	4.87846	3.88518	4.77554	4.58932	6.13671	5.69806	6.0514	6.13603	5.97295	5.68703	5.64184	6.16075	6.28326	5.63968
Pzp	ENSMUSG00000030359	1.49898	0.00324	2.89806	3.20508	3.83467	2.85829	2.90755	2.54475	3.15177	3.67995	2.63866	2.77979	4.27623	3.39188	4.08607	4.75866	4.71246	2.73117	3.47829	4.54214	3.92549	4.00088
Gm6665	ENSMUSG00000091561	1.46806	0.00279	3.7237	3.03168	4.67064	3.39274	3.67339	3.81689	3.56314	3.15351	4.11813	2.56357	4.27623	5.58056	5.20523	3.13855	5.24716	4.59929	3.60471	5.48351	5.04902	4.26942
Erdr1	ENSMUSG00000095562	1.4666	1.77e-11	5.832	4.96136	5.55265	5.39007	5.04016	5.09923	6.52315	5.183	5.56795	5.22706	6.56437	6.81791	6.99749	6.94484	6.40987	6.79906	7.1372	7.46443	6.82918	6.72161
Gm13841	ENSMUSG00000083833	1.45779	3.46e-46	7.02962	7.09422	7.26065	7.12392	7.26464	7.21888	7.05559	7.19993	6.82209	6.58136	8.80309	8.65952	8.32553	8.30568	8.47395	8.3255	8.66947	8.26402	8.56613	8.60108
Atxn10	ENSMUSG00000016541	1.45073	2.41e-12	5.35209	4.80845	6.4129	5.99121	5.38065	5.41062	5.29239	6.05954	5.69745	5.11215	7.06054	7.39271	6.86449	6.79054	6.45356	7.19532	7.1267	6.76908	6.8849	7.23171
Dmrt2	ENSMUSG00000048138	1.41801	0.00165	4.41082	3.95311	5.43307	3.53442	3.76918	4.29264	3.97543	4.97406	4.4476	3.8594	5.47457	4.98238	5.06305	6.8991	3.39706	6.111	6.11526	5.17647	4.948	5.47238
Gm17354	ENSMUSG00000091985	1.39803	0.000766	3.10528	3.62705	3.83467	2.62473	3.06683	2.75544	3.97543	3.88518	3.69044	2.77979	3.59608	4.01628	4.52623	4.7065	4.84956	4.49055	3.8285	5.04209	4.59397	4.09606
Crim1	ENSMUSG00000024074	1.39403	0.00147	3.10528	3.20508	5.76565	3.78184	4.23952	3.61562	4.36578	3.56524	4.51943	4.27004	4.64624	5.69806	5.71348	5.19706	5.38889	4.59929	4.78007	5.64677	5.70423	6.30987
Irs1	ENSMUSG00000055980	1.38929	0.00889	3.7237	2	4.9574	3.99297	4.69468	5.347	3.78396	3.78621	3.92008	2.96779	3.93828	5.72045	6.37099	4.9047	4.84956	5.55824	4.41626	5.21862	5.50526	5.67094
Gm9200	ENSMUSG00000083595	1.37876	1.19e-43	7.43677	7.04942	7.3124	7.25254	7.27284	6.89107	7.40254	7.40563	6.90488	7.0557	8.44607	8.72467	8.56856	8.49054	8.39213	8.4899	8.48451	8.43465	8.99434	8.52615
Gm15610	ENSMUSG00000078183	1.37598	0.00055	3.59214	3.20508	3.39697	3.05925	3.21025	2.75544	2.98367	2.98523	3.25835	2.77979	3.68953	4.21862	4.2261	4.75866	4.09332	4.10431	3.47829	3.77073	3.92549	3.67066
Ccl11	ENSMUSG00000020676	1.37257	0.000544	4.48688	4.51091	4.0932	4.17712	4.30491	3.99348	3.97543	4.36833	4.20782	3.13409	5.52615	5.05467	3.75716	6.0339	4.09332	4.10431	5.75523	5.67732	6.03497	5.24206
Stc2	ENSMUSG00000020303	1.31427	0.000458	5.3922	6.97951	5.83806	6.27987	6.89163	6.56736	6.25425	6.79155	6.0765	8.53915	8.1291	8.76832	8.12989	9.02826	7.00176	8.30156	7.70137	7.35531	8.09693	7.46356
Ecm1	ENSMUSG00000028108	1.30192	0.00735	2.89806	3.95311	3.92609	3.23561	3.21025	3.81689	3.30231	3.78621	4.20782	3.13409	4.0125	3.14936	4.81947	4.12581	4.29887	4.43293	3.1864	5.13305	5.50526	5.36181
BC023719	ENSMUSG00000092365	1.3015	1.47e-63	9.88547	9.29349	9.58759	9.39853	9.69075	9.75443	9.71045	9.8408	9.93779	9.8405	11.1603	10.7393	10.844	11.0776	11.1175	10.9644	11.0456	11.0639	10.9714	11.016
Rsph9	ENSMUSG00000023966	1.29663	8.94e-06	4.98339	5.83956	5.04159	4.26106	5.57872	4.70159	5.64218	4.22454	4.9416	5.91634	6.55198	7.07413	6.29351	6.07563	6.43188	6.09252	6.68657	6.26499	6.81491	5.36181
Gm6682	ENSMUSG00000091269	1.29641	9.99e-17	6.6868	6.88068	6.99107	6.10916	6.27746	6.60863	6.69632	6.58625	6.82209	6.56689	7.61919	7.70494	8.29405	8.17262	7.93352	8.36839	7.57579	7.35531	8.03054	7.62387
Zfp933	ENSMUSG00000059423	1.29399	6.97e-39	7.94131	7.5849	7.77271	7.37062	7.85626	7.47841	7.9102	7.62912	7.78912	7.452	9.09334	9.04165	8.89926	9.16259	8.97884	9.30448	8.68028	8.83765	8.76113	8.78729
Gnmt	ENSMUSG00000002769	1.28178	0.00135	4.62792	4.69668	4.7727	3.05925	4.78911	4.35865	2	3.67995	5.22548	4.89761	6.05126	5.76422	5.615	5.50255	5.19664	5.35612	5.31192	5.70723	5.27439	5.63968
H3c15	ENSMUSG00000081058	1.2815	9.1e-38	9.64525	9.79709	9.56643	9.23948	9.44097	9.62127	9.70708	9.6517	9.13728	8.88666	10.9714	10.7957	10.869	10.5789	10.7227	10.6322	10.9756	10.589	10.716	10.7944
Clu	ENSMUSG00000022037	1.27828	0.00183	5.17949	4.57553	6.88113	4.26106	5.99001	5.64029	3.30231	5.46483	6.10011	4.89761	6.35211	7.25376	6.76467	5.80501	6.72709	6.83286	5.88548	6.57183	7.25634	7.14534
Sult4a1	ENSMUSG00000018865	1.27526	1.59e-21	7.17464	7.42751	7.60301	7.66066	6.73437	7.37854	6.87514	6.72631	7.29082	7.32014	8.14569	8.31785	8.70049	8.2521	8.41992	8.45052	8.61793	8.77194	8.70031	8.54736
Heph	ENSMUSG00000031209	1.27023	0.00284	4.69358	3.03168	5.86141	4.79932	4.36746	4.54028	4.97129	3.15351	5.63415	3.28319	5.60023	6.07348	6.19468	5.67533	5.14429	6.36314	5.45306	5.70723	6.0594	5.84544
Bex4	ENSMUSG00000047844	1.26979	0.000156	4.75639	3.8524	5.40156	3.89127	4.02343	4.22346	5.10022	4.14689	5.78747	4.75168	5.69342	5.92712	5.42461	5.23438	5.51794	5.68703	5.86036	6.7259	5.93293	6.18554
Zfp268	ENSMUSG00000078502	1.26855	9.47e-24	7.7844	7.67613	7.93558	7.69879	7.92546	7.73604	7.08704	8.08449	7.50056	7.95823	8.90889	8.88691	8.51153	8.92363	9.12108	9.21545	9.12997	9.02745	8.78329	9.45463
Gm36371	ENSMUSG00000109108	1.26844	0.00513	2.89806	3.49963	3.11554	3.39274	3.06683	2.93925	2.79337	2.79471	3.92008	3.41831	3.27277	4.65046	3.75716	4.34637	3.20596	3.86392	3.72094	3.98124	4.83936	4.18534
Hpgd	ENSMUSG00000031613	1.26527	0.00845	3.28644	2.83455	4.67064	4.48706	2.52399	4.59608	2.79337	3.44061	3.56028	3.65564	5.05025	4.55401	4.2261	4.65238	4.47876	5.44623	4.19294	4.60705	4.29811	5.47238
Snora81	ENSMUSG00000087935	1.26359	0.00165	3.10528	4.44326	5.23277	5.10214	5.44007	4.75158	5.10022	6.54143	4.20782	4.40634	6.48838	6.97517	5.95404	5.23438	6.27029	6.36314	6.11526	6.20335	6.6478	5.43645
Clcn6	ENSMUSG00000029016	1.25736	3.81e-14	6.34242	6.34493	6.44417	5.80799	5.7761	6.9671	6.11876	6.1419	6.43328	6.12831	7.7223	7.5941	7.39625	7.69899	7.37553	7.37431	7.47179	7.96917	6.97752	7.18917
Tceal9	ENSMUSG00000042712	1.24906	0.000139	5.94416	5.00893	7.15122	5.23263	6.06742	5.94964	6.0776	4.78195	6.83622	5.4326	6.39436	7.56964	7.31232	6.56011	7.10124	7.7317	6.59814	7.40179	7.88782	6.92972
Hspg2	ENSMUSG00000028763	1.24874	0.00675	3.44737	4.69668	6.15392	5.19043	5.7761	6.13056	4.06241	5.80531	4.29225	4.94315	5.11905	6.56918	6.54155	5.87757	5.51794	7.47051	5.72771	5.41266	6.75636	7.41824
Gnat1	ENSMUSG00000034837	1.24819	1.14e-06	4.75639	4.2189	4.31238	5.00809	4.74267	4.6498	4.49648	4.36833	5.22548	5.4326	6.05126	5.88809	5.95404	6.01258	5.91162	6.49567	6.15713	5.48351	4.8947	5.43645
Olfr972	ENSMUSG00000094449	1.24789	0.00348	2	3.20508	3.26311	3.78184	3.76918	3.38166	3.88287	3.78621	3.25835	2.96779	4.15038	4.55401	3.75716	4.7065	3.71681	4.31032	3.60471	5.04209	4.59397	4.00088
H3c14	ENSMUSG00000093769	1.22461	0.000377	10.0822	10.1459	8.86431	9.57495	9.78686	9.47269	10.0387	10.0325	9.58505	9.3297	11.3039	11.1212	11.1983	10.8966	11.0409	10.9503	11.2821	10.93	7.32845	11.1208
Syndig1	ENSMUSG00000074736	1.20292	0.00614	3.28644	3.8524	4.56082	4.34039	3.94356	4.54028	4.67269	2	4.0225	3.8594	5.6241	4.90628	4.08607	5.23438	4.78264	5.00717	4.66869	4.24866	5.097	5.92537
Zrsr1	ENSMUSG00000044068	1.19794	0.000416	5.26837	3.49963	5.00011	4.17712	4.69468	4.89195	5.29239	4.56026	5.38779	4.58932	5.30774	6.72128	6.19468	5.70221	4.29887	5.80526	6.11526	5.44852	5.79429	6.38718
Gm47283	ENSMUSG00000096768	1.19195	3.79e-08	6.44131	5.48322	6.31481	6.29985	5.7761	5.64029	7.33427	6.32933	6.35692	6.04722	7.11208	7.49367	7.57716	7.58082	6.86288	7.42691	7.56805	7.88006	7.34841	7.33288
Cox4i2	ENSMUSG00000009876	1.18632	0.00132	4.55912	3.8524	4.5026	4.26106	3.57079	5.06009	5.01556	4.61896	5.49856	4.19673	4.94046	4.94483	5.5093	6.56011	5.34318	5.66218	5.34852	5.08828	5.31552	6.64499
Akap6	ENSMUSG00000061603	1.18216	1.85e-10	6.25812	6.76075	6.9481	5.94119	7.09016	6.13056	6.69632	6.38111	5.95225	6.41357	8.0695	7.38572	7.98954	7.58805	7.74425	7.6135	7.01728	7.94427	7.32845	7.56686
Gm14000	ENSMUSG00000084140	1.17369	0.00189	3.28644	2.83455	3.11554	3.23561	3.57079	3.71976	3.15177	2.98523	2.63866	3.13409	4.15038	4.28021	3.75716	3.76689	4.19975	3.86392	4.19294	3.98124	3.69551	3.78933
Gm14036	ENSMUSG00000082399	1.17336	5.38e-20	5.54232	5.78596	5.74068	5.62998	5.65594	5.74272	5.64218	5.77981	5.42566	5.46419	6.93257	7.00284	6.74151	6.37199	6.77952	6.5777	6.86138	6.47082	6.8849	6.79437
Olfr315	ENSMUSG00000056959	1.16932	0.000273	4.87435	3.8524	3.73705	4.55515	4.36746	4.54028	3.30231	4.14689	4.11813	4.53087	5.52615	5.01898	5.20523	5.23438	5.14429	4.49055	4.93251	6.24474	4.72188	5.28309
Gm8115	ENSMUSG00000104560	1.16623	0.00118	3.84425	4.57553	3.83467	2.85829	3.76918	4.07428	3.97543	3.44061	4.51943	4.0379	4.33526	4.78404	5.58929	4.7065	4.91352	4.24486	4.78007	4.945	5.70423	4.26942
H3c1	ENSMUSG00000069265	1.16042	1.08e-15	8.10712	8.67676	8.2238	8.41395	8.47612	8.74113	8.87131	8.54805	7.99208	7.78774	9.70026	9.86455	9.63663	9.2172	9.43617	9.46758	9.79094	9.06547	9.93194	9.36192
Gm21663	ENSMUSG00000104824	1.153	0.00659	3.28644	3.20508	3.51945	3.39274	3.06683	3.10226	2.98367	2.98523	3.07982	2.96779	3.00835	3.942	4.68029	3.42344	3.9784	4.02855	3.60471	3.98124	3.92549	4.00088
Padi4	ENSMUSG00000025330	1.14584	4.4e-10	5.17949	4.44326	5.30267	5.10214	4.92009	4.6498	4.67269	4.78195	5.2678	4.27004	6.05126	5.67531	5.82782	6.17494	5.81446	5.68703	5.93446	5.95174	6.13028	5.95106
H2-T-ps	ENSMUSG00000073405	1.14029	4.31e-32	6.53385	6.8286	6.78672	6.741	6.62341	6.73827	6.7885	6.6857	6.57485	6.65162	7.7388	7.38572	7.91389	7.92123	7.69959	8.05178	7.8619	7.96917	7.76697	7.67101
Gm10566	ENSMUSG00000073737	1.13526	0.00295	3.10528	2.83455	3.63235	3.39274	3.06683	3.10226	2.98367	3.15351	3.07982	2.96779	3.93828	3.942	3.66172	3.76689	3.85353	3.86392	3.9286	3.52417	4.29811	3.89898
Gm16374	ENSMUSG00000115205	1.13219	0.000124	3.44737	3.35986	3.83467	3.78184	3.21025	3.50338	3.78396	3.56524	3.92008	3.28319	4.39197	4.65046	4.52623	4.34637	4.29887	4.54594	4.0222	4.16491	4.59397	4.56391
Gm6969	ENSMUSG00000066553	1.12499	2.33e-32	6.56927	6.5518	6.36469	6.61904	6.46078	6.52486	6.65494	6.57146	6.37639	6.3973	7.85933	7.78149	7.65357	7.33673	7.57658	7.607	7.65098	7.52447	7.41616	7.49009
Prdm5	ENSMUSG00000029913	1.12453	0.00287	3.28644	3.8524	3.73705	4.34039	2.90755	3.99348	4.06241	3.56524	3.56028	4.0379	4.86234	4.21862	4.471	4.41299	4.29887	3.67805	4.27128	5.33814	4.78182	5.43645
Nubpl	ENSMUSG00000035142	1.11881	7.96e-10	6.42206	6.26881	6.59108	5.99121	6.06742	6.49582	6.15879	5.97219	6.0765	5.4326	7.38081	7.72169	7.39625	7.23913	7.14186	7.73766	6.94742	6.99202	6.61522	6.94259
Gm13230	ENSMUSG00000082082	1.11749	2.32e-08	4.62792	4.91217	4.868	5.27363	4.30491	4.42177	4.72695	5.01834	4.37202	4.89761	5.88341	5.94625	5.5093	5.44004	5.91162	5.78238	5.55054	5.67732	5.54039	6.24904
Gm14830	ENSMUSG00000081418	1.11667	0.00143	3.59214	3.35986	3.26311	3.66343	3.76918	2.93925	4.06241	3.78621	2.87604	3.13409	4.27623	4.74087	4.35374	4.20314	4.39162	4.54594	4.41626	4.16491	3.92549	3.67066
Adam8	ENSMUSG00000025473	1.11307	0.000984	6.79547	5.86564	5.95121	6.08633	6.14088	6.45113	6.49215	4.8812	5.95225	5.7724	6.92298	6.53168	6.26131	6.19401	5.81446	7.85745	7.62137	6.87829	7.48989	8.25941
Frmd6	ENSMUSG00000048285	1.0996	0.00174	5.54232	4.75365	5.33639	6.06313	5.55204	5.347	4.55764	5.183	5.56795	5.52535	5.96043	6.48012	6.386	6.01258	6.36483	8.00312	5.51877	6.07157	5.85135	5.54164
Dmrtb1	ENSMUSG00000028610	1.09807	1.27e-07	7.36804	6.74679	6.99107	6.89345	8.00631	7.95989	8.12748	8.16548	7.80357	7.87256	8.70298	8.35411	8.57512	8.71174	9.32885	8.647	8.82367	8.49163	9.27283	8.35391
H1f4	ENSMUSG00000051627	1.08903	0.00532	7.27458	7.41873	8.23725	7.01932	7.21448	7.21888	8.00657	7.52554	8.75757	7.11659	8.66609	8.53555	8.50811	8.1822	6.87899	8.7655	10.1753	8.38924	9.32915	7.86591
Gm22748	ENSMUSG00000064427	1.06888	0.00537	4.87435	2.83455	4.0932	4.34039	4.8341	4.1508	4.14444	4.8812	4.37202	3.65564	5.82282	5.62871	4.77455	4.59615	5.08996	4.02855	5.83479	5.41266	4.65934	5.43645
Rps19bp1	ENSMUSG00000051518	1.06888	2.33e-37	8.3757	8.58948	8.48286	8.43217	8.37317	8.48449	8.8952	8.44638	8.73134	8.5205	9.3881	9.63774	9.62718	9.83657	9.5982	9.8864	9.45141	9.40135	9.62136	9.48132
Gm4350	ENSMUSG00000115089	1.06788	1.55e-27	8.41029	8.52141	8.34885	8.80856	8.75879	8.66164	8.72234	8.59632	8.39191	8.91551	9.92827	9.56381	9.57247	9.21487	9.68322	9.48185	9.74706	9.84988	9.73943	9.93513
Gm21742	ENSMUSG00000099871	1.06663	0.00447	4.81658	5.37845	4.72257	5.27363	4.36746	4.89195	2	3.88518	5.38779	4.75168	5.94155	5.60484	5.30336	5.90097	5.55851	5.41681	5.38422	5.73654	6.03497	6.04947
Mid1ip1	ENSMUSG00000008035	1.06317	9.81e-08	5.3922	5.30413	5.26815	5.27363	5.44007	5.06009	5.4296	5.39936	6.02807	5.74695	6.32324	6.50613	6.72979	6.7265	5.91162	6.76444	5.80875	6.11685	6.17567	6.92972
Gm3436	ENSMUSG00000096160	1.06038	9.04e-09	6.30088	5.83956	6.03574	6.27987	5.7761	6.05294	5.96922	5.52745	6.0765	6.84395	6.86407	7.04781	7.26439	7.46785	6.45356	7.35117	6.98277	7.43792	7.28768	6.78011
Mael	ENSMUSG00000040629	1.056	1.71e-13	9.21315	9.14968	8.71528	8.28453	9.08155	8.79874	9.26885	9.26282	9.11427	9.4509	9.97542	10.3462	10.3987	9.60865	9.76784	9.82334	10.4378	9.89444	10.3082	10.3321
Gm26461	ENSMUSG00000092805	1.05526	5.39e-10	9.92531	10.0411	10.0328	9.96742	10.707	10.9761	9.98408	10.0512	9.78042	9.66817	11.7861	11.384	11.4872	11.075	11.3028	11.1657	11.1767	11.1378	10.8063	10.5505
Eps8l1	ENSMUSG00000006154	1.04953	0.00119	4.05879	3.95311	3.83467	4.6824	3.859	4.22346	4.49648	4.72964	3.56028	4.27004	4.77974	5.28246	5.33464	4.20314	5.38889	4.74844	4.66869	4.47418	5.31552	5.92537
NA	ENSMUSG00000094265	1.04688	0.00123	6.07312	6.22919	5.90701	6.06313	6.32552	6.07274	5.67014	6.12175	4.9416	4.69957	7.83397	7.16674	7.09205	6.65948	6.5968	6.84395	6.71488	7.37408	5.50526	5.50743
Gm10293	ENSMUSG00000070490	1.04391	0.000103	3.59214	3.74412	4.17002	3.78184	3.76918	3.81689	3.56314	3.56524	4.20782	3.95141	4.59884	4.74087	4.35374	4.34637	4.84956	4.49055	4.6096	4.72871	4.59397	5.11147
NA	ENSMUSG00000096613	1.03981	1.21e-06	7.68297	7.79623	7.55369	7.60553	8.25406	8.39688	7.63314	7.59297	7.30105	6.71862	9.36527	8.7302	8.95568	8.55833	8.84584	8.84772	8.77408	8.95137	8.04895	7.7463
Zbtb17	ENSMUSG00000006215	1.0381	1.2e-15	7.9209	7.96251	8.01582	8.24899	7.67646	7.72357	8.22025	7.62912	8.5068	8.25309	8.83156	8.8493	9.24833	9.17223	9.17426	9.47651	8.91191	9.25966	8.73862	8.81902
1700030C10Rik	ENSMUSG00000091071	1.03627	0.00517	3.59214	3.62705	3.73705	3.78184	3.06683	3.61562	3.88287	3.30419	2.63866	3.13409	4.33526	3.59944	4.52623	4.27653	4.09332	4.65074	3.8285	4.076	3.81508	4.62902
Samm50	ENSMUSG00000022437	1.03522	1.53e-36	7.52959	7.84292	7.66404	7.51439	7.81757	7.58567	7.86857	7.65739	7.71458	8.14031	8.68039	8.71634	8.90188	8.95191	8.81687	8.81989	8.65127	8.65786	8.62049	8.82251
Gm4609	ENSMUSG00000078592	1.02865	0.000681	3.7237	3.74412	3.73705	3.99297	3.21025	3.71976	3.78396	3.44061	4.37202	2.96779	4.64624	4.50325	4.52623	4.75866	4.56094	4.24486	4.19294	4.24866	4.5255	4.56391
H4c9	ENSMUSG00000060639	1.0285	9.77e-17	7.70702	7.60825	7.69686	7.08989	8.04031	7.72982	8.03373	7.71234	7.35111	7.452	8.66033	8.82108	8.92261	8.50969	8.89023	8.80294	8.78414	8.65402	8.30017	8.33939
Gm24451	ENSMUSG00000065287	1.01789	0.00178	3.95551	3.95311	4.31238	3.53442	3.859	4.75158	3.88287	4.14689	4.0225	3.41831	5.27795	5.1235	4.57943	4.53764	4.39162	4.31032	4.66869	4.99436	5.64091	4.42417
Olfr287	ENSMUSG00000090129	1.01757	5.96e-14	7.43677	7.41873	7.21606	7.77216	7.55405	7.17375	7.2348	7.59297	6.90488	6.73165	8.35629	8.74938	8.22895	7.97734	8.12128	8.27721	8.59527	8.1918	8.31546	8.34909
Crispld2	ENSMUSG00000031825	1.0166	0.00151	5.35209	4.63738	5.15931	4.74204	4.64504	5.01985	5.4296	4.06482	4.51943	5.15148	5.01457	6.49319	5.87113	5.99094	5.97295	6.34764	4.88346	4.54214	6.24118	5.81779
Tuba1c	ENSMUSG00000043091	1.00423	5e-12	10.5865	10.619	10.5978	10.1256	10.0298	10.3014	10.4908	10.7236	10.1178	10.3965	11.1623	11.186	11.613	11.866	11.4986	12.0622	11.0949	10.8033	11.3696	11.0416
Plod2	ENSMUSG00000032374	1.0008	0.000876	4.62792	4.29763	5.76565	5.31349	5.28667	5.09923	4.87846	4.83242	5.49856	4.1195	5.86349	6.29854	6.17753	5.37469	5.14429	5.97634	5.15546	6.7259	6.19784	5.92537
