# Supplementary material for: UHRF1 is essential for proper cytoplasmic architecture and function of mouse oocytes and derived embryos
Source: Life Sci Alliance. 2023 May 24;6(8):e202301904. doi: 10.26508/lsa.202301904 (PMC10209520; doi:10.26508/lsa.202301904)
Supplement: Supplementary file 5 [file LSA-2023-01904_TableS3.xlsx]

## Sheet: TableS3
Table 3 Proteomic profiling of control and Uhrf1 KO FGOs.
Proteins that passed our filter (n = 2,058) are listed in the order of intensity in control FGOs. Protein levels are shown in Log2 (signal intensity + 4).
Protein symbol	Protein name	UniProt ID	Log2 fold change	Control_1	Control_2	Control_3	KO_1	KO_2	KO_3
LDHB	L-lactate dehydrogenase B chain	P16125	-0.413407	35.6043	35.6044	35.7029	35.2314	34.6323	35.6381
PADI6	Protein-arginine deiminase type-6	Q8K3V4	-0.677536	35.1683	35.3591	35.6762	34.5982	34.1474	35.2545
ZP2	Zona pellucida sperm-binding protein 2	P20239	-0.65378	33.8007	33.8903	34.2597	33.1684	32.5078	33.9801
NLRP5	NACHT, LRR and PYD domains-containing protein 5	Q9R1M5	-0.662298	33.4935	33.8565	33.9155	32.9781	32.4573	33.6361
ACTB	Actin, cytoplasmic 1	P60710	-0.585238	32.9995	33.3006	33.7184	32.8493	31.4444	33.4255
NLRP14	NACHT, LRR and PYD domains-containing protein 14	Q6B966	-1.43111	32.9863	33.3357	33.592	31.8566	31.0586	32.4463
HSP90AA1	Heat shock protein HSP 90-alpha	P07901	-0.275983	32.8368	33.1131	33.4251	32.68	32.1177	33.4814
TLE6	Transducin-like enhancer protein 6	Q9WVB3	-0.901456	32.7343	33.004	33.4004	32.1379	31.1088	32.7974
UCHL1	Ubiquitin carboxyl-terminal hydrolase isozyme L1	Q9R0P9	-0.879341	32.6367	32.8319	33.32	32.0093	30.9935	32.7362
ZP3	Zona pellucida sperm-binding protein 3	P10761	-0.82087	32.6092	32.5389	33.2083	31.9763	31.0126	32.5906
EEF1A1	Elongation factor 1-alpha 1	P10126	-0.556381	32.0329	32.3686	33.015	31.5831	31.2548	32.6802
KHDC3	KH domain-containing protein 3	Q9CWU5	-0.669711	32.3341	32.5653	32.9721	31.938	31.3236	32.4564
HSPA8	Heat shock cognate 71 kDa protein	P63017	-0.395337	32.3189	32.6383	32.956	32.1497	31.6078	32.7953
PRDX4	Peroxiredoxin-4	O08807	-0.798397	31.3932	32.4685	32.9552	31.8998	31.0717	31.7305
SH3D21	SH3 domain-containing protein 21	Q7TSG5	-0.481579	32.8431	32.7498	32.9346	32.9041	30.9506	32.5883
UHRF1	Ubiquitin-like-containing PHD and RING finger domains protein 1	Q8VDF2	-9.17115	32.2729	32.6121	32.9093	24.3006	22.6154	22.7979
PRDX1	Peroxiredoxin-1	P35700	-0.600262	31.8739	32.0696	32.5924	31.473	30.5294	32.3061
HSP90B1	Endoplasmin	P08113	-0.530013	31.9661	32.2258	32.5788	31.6209	31.0782	32.2916
ZP1	Zona pellucida sperm-binding protein 1	Q62005	-0.867504	31.7601	32.0085	32.5711	31.1155	30.2544	31.9853
PDIA3	Protein disulfide-isomerase A3	P27773	-0.563862	31.8929	32.0903	32.4618	31.4879	30.9104	32.1491
PKM	Pyruvate kinase PKM	P52480	-0.390883	31.5232	32.0318	32.4531	31.5076	31.0093	32.2113
YBX2	Y-box-binding protein 2	Q9Z2C8	-0.642316	31.1602	31.5503	32.2157	30.9471	30.1349	31.7041
NLRP4F	NACHT, LRR and PYD domains-containing protein 4F	Q66X05	-0.826092	31.3937	31.7478	32.0763	30.8429	30.1277	31.5206
PECR	Peroxisomal trans-2-enoyl-CoA reductase	Q99MZ7	-0.697111	31.1581	31.5361	32.0499	30.8565	30.1601	31.4809
FBXO38	F-box only protein 38	Q8BMI0	-1.35739	32.0165	31.0985	24.4502	23.9539	22.7806	31.2638
TRAP1	Heat shock protein 75 kDa, mitochondrial	Q9CQN1	-0.362949	31.3659	31.5365	31.986	31.1956	30.6054	31.819
GAPDH	Glyceraldehyde-3-phosphate dehydrogenase	P16858	-0.405604	31.3724	31.5749	31.9808	31.0113	30.3126	31.9729
TUBB4B	Tubulin beta-4B chain	P68372	-1.56565	31.1307	31.2886	31.9528	29.9575	29.2141	30.4025
NPM2	Nucleoplasmin-2	Q80W85	-0.736565	31.0101	31.572	31.8549	30.7321	30.0238	31.3141
DNMT1	DNA (cytosine-5)-methyltransferase 1	P13864	-0.564931	30.5049	31.0037	31.8411	30.7752	29.4949	31.2145
HSPA5	Endoplasmic reticulum chaperone BiP	P20029	-0.529931	31.0909	31.5851	31.7209	30.9223	30.095	31.5226
OOEP	Oocyte-expressed protein homolog	Q9CWE6	-0.789651	30.8821	31.0768	31.6648	30.1146	29.2968	31.2772
HSP90AB1	Heat shock protein HSP 90-beta	P11499	-0.317488	30.9376	31.2174	31.6351	30.8444	30.2909	31.5243
BPGM	Bisphosphoglycerate mutase	P15327	-0.750708	30.8903	31.4924	31.5469	30.8499	30.0901	30.7167
RPS27A	Ubiquitin-40S ribosomal protein S27a	P62983	-0.885526	30.6173	30.9778	31.4291	29.9789	29.1203	30.8678
KRT76	Keratin, type II cytoskeletal 2 oral	Q3UV17	1.72491	28.5747	2	28.079	31.4183	27.5625	28.2547
GYG1	Glycogenin-1	Q9R062	-0.758834	30.7861	31.0415	31.4015	30.4025	29.6072	30.7768
ACTA1	Actin, alpha skeletal muscle	P68134	-0.564052	30.4362	31.3886	31.2701	30.7918	29.3436	30.9648
G6PDX	Glucose-6-phosphate 1-dehydrogenase X	Q00612	-0.55526	30.737	31.0264	31.3668	30.3104	29.7623	31.1292
RDX	Radixin	P26043	-0.509549	30.7988	31.0731	31.3143	30.4124	29.9498	31.1044
MTMR14	Myotubularin-related protein 14	Q8VEL2	-0.642386	30.7027	31.006	31.2902	30.2271	29.6747	30.9467
ALDH9A1	4-trimethylaminobutyraldehyde dehydrogenase	Q9JLJ2	-0.635555	30.3844	30.8183	31.2415	30.124	29.4428	30.789
PRRC2C	Protein PRRC2C	Q3TLH4	-1.73367	29.8	30.429	31.1954	28.736	27.4184	29.6262
ASTL	Astacin-like metalloendopeptidase	Q6HA09	-0.395242	30.1997	30.5047	30.9804	29.834	28.5079	31.141
CLTC	Clathrin heavy chain 1	Q68FD5	-0.444424	30.3581	30.7213	31.0769	30.2369	29.3851	30.9049
CKB	Creatine kinase B-type	Q04447	-0.852372	29.8119	30.1795	31.0713	29.4129	28.693	30.2719
CALR	Calreticulin	P14211	-0.610294	30.331	30.7102	31.0487	30.12	29.3258	30.6205
AKR1B1	Aldo-keto reductase family 1 member B1	P45376	-0.339704	30.3324	30.6041	30.959	30.1897	29.6099	30.8708
TUBB2A	Tubulin beta-2A chain	Q7TMM9	-1.31388	30.0927	30.2662	30.8929	29.1033	28.4586	29.6396
NUDT5	ADP-sugar pyrophosphatase	Q9JKX6	-0.671286	30.1332	30.4133	30.8778	29.8457	28.9678	30.3689
PRDX2	Peroxiredoxin-2	Q61171	-0.630421	30.1317	30.3231	30.7973	29.8012	28.8741	30.3885
ALDH2	Aldehyde dehydrogenase, mitochondrial	P47738	-0.645685	30.0134	30.3556	30.7654	29.5643	28.8954	30.4278
HSPD1	60 kDa heat shock protein, mitochondrial	P63038	-0.336961	30.0271	30.3012	30.7416	29.9885	29.3405	30.5664
ALDH7A1	Alpha-aminoadipic semialdehyde dehydrogenase	Q9DBF1	-0.648139	29.9692	30.3725	30.6982	29.5713	28.8457	30.3716
YWHAZ	14-3-3 protein zeta/delta	P63101	-0.808959	29.6756	30.1235	30.6799	29.2559	28.4249	30.0833
ANXA7	Annexin A7	Q07076	-0.662292	29.8839	29.9452	30.6465	29.3103	28.6795	30.2143
DDX25	ATP-dependent RNA helicase DDX25	Q9QY15	-8.40665	28.2261	2	30.5941	21.4429	2	2
CRYL1	Lambda-crystallin homolog	Q99KP3	-0.679453	29.7726	30.2087	30.5833	29.4952	28.563	30.1588
ALDOA	Fructose-bisphosphate aldolase A	P05064	-0.51228	29.9654	30.2558	30.4867	29.4756	28.9823	30.3949
ADSS2	Adenylosuccinate synthetase isozyme 2	P46664	-0.465473	29.37	29.823	30.4729	29.0337	28.6702	30.2679
GDI2	Rab GDP dissociation inhibitor beta	Q61598	-0.437901	29.6658	29.9764	30.4336	29.4738	28.78	30.2451
TUBB4A	Tubulin beta-4A chain	Q9D6F9	-1.08849	29.0811	29.2802	30.417	28.4529	27.8059	29.2663
ATP5F1B	ATP synthase subunit beta, mitochondrial	P56480	-0.341875	29.6302	29.9938	30.3685	29.7035	28.7264	30.2474
ZBED3	Zinc finger BED domain-containing protein 3	Q9D0L1	-0.72596	29.5553	29.7708	30.2951	29.057	27.9886	29.9009
YWHAG	14-3-3 protein gamma [Cleaved into: 14-3-3 protein gamma, N-terminally processed]	P61982	-0.66692	29.5266	29.905	30.2661	29.3263	28.2873	29.7971
DDX6	Probable ATP-dependent RNA helicase DDX6	P54823	-0.367254	29.6347	29.8079	30.2305	29.379	28.7461	30.1642
ATP5F1A	ATP synthase subunit alpha, mitochondrial	Q03265	-0.276567	29.452	29.8249	30.1711	29.5216	28.8446	30.0822
NLRP9B	NACHT, LRR and PYD domains-containing protein 9B	Q66X22	-1.13434	29.4388	29.4881	30.1484	28.4645	27.7371	29.2136
MPRIP	Myosin phosphatase Rho-interacting protein	P97434	-0.263553	28.6295	28.8855	30.0875	2	2	29.0859
ST13	Hsc70-interacting protein	Q99L47	-0.400932	29.4031	29.6354	30.0873	29.271	28.5762	29.8758
LSM14B	Protein LSM14 homolog B	Q8CGC4	-0.804009	29.4031	29.6441	30.0509	28.7511	27.5404	29.7084
UBE2D3	Ubiquitin-conjugating enzyme E2 D3	P61079	-1.86426	29.5406	29.697	29.9963	28.032	27.0336	28.3233
ATIC	Bifunctional purine biosynthesis protein ATIC	Q9CWJ9	-0.637957	23.3899	29.9765	24.4376	23.7933	23.9258	29.3197
NUDC	Nuclear migration protein nudC	O35685	-0.656633	29.306	29.6055	29.964	28.7783	28.2138	29.6317
VDAC3	Voltage-dependent anion-selective channel protein 3	Q60931	-0.545771	29.1456	29.6032	29.934	29.0284	28.1922	29.6003
PGS1	CDP-diacylglycerol--glycerol-3-phosphate 3-phosphatidyltransferase, mitochondrial	Q8BHF7	-0.807654	29.2205	29.6941	29.9053	29.0086	27.6146	29.3462
DLD	Dihydrolipoyl dehydrogenase, mitochondrial	O08749	-0.411946	29.1521	29.5113	29.8977	29.0246	28.3715	29.7161
DDB1	DNA damage-binding protein 1	Q3U1J4	-0.660444	29.1108	29.4392	29.8742	28.7875	27.9004	29.4552
EEF2	Elongation factor 2	P58252	-0.482325	29.2661	29.6339	29.8713	28.9985	28.1838	29.7775
MYO1B	Unconventional myosin-Ib	P46735	0.011618	27.0745	29.84	28.9185	29.0633	26.3089	29.8663
CUL1	Cullin-1	Q9WTX6	-0.636992	29.2306	29.5792	29.8564	28.7807	28.189	29.5366
FGD5	FYVE, RhoGEF and PH domain-containing protein 5	Q80UZ0	-0.0978692	2	29.2002	29.8554	2	2	29.4668
UBA1	Ubiquitin-like modifier-activating enzyme 1	Q02053	-0.474351	29.0754	29.3235	29.855	28.648	28.3571	29.6202
PLAA	Phospholipase A-2-activating protein	P27612	-0.41802	29.0697	29.4718	29.8437	28.9971	28.2904	29.639
RAN	GTP-binding nuclear protein Ran	P62827	-0.531579	29.1958	29.3812	29.8432	28.6728	28.1876	29.6489
PDCD6IP	Programmed cell death 6-interacting protein	Q9WU78	-0.461646	29.0731	29.3404	29.8042	28.8075	28.3183	29.5388
KRT1	Keratin, type II cytoskeletal 1	P04104	-0.157402	28.2646	27.2809	29.7629	29.7986	27.0997	27.3791
ACAT1	Acetyl-CoA acetyltransferase, mitochondrial	Q8QZT1	-0.355344	28.9086	29.4739	29.7966	28.962	28.3696	29.6389
ENO1	Alpha-enolase	P17182	-0.433335	29.2942	29.6275	29.7805	29.1001	28.6137	29.5727
PAOX	Peroxisomal N	Q8C0L6	-0.763005	29.0242	29.3795	29.7502	28.4379	27.9652	29.2529
GPI	Glucose-6-phosphate isomerase	P06745	-0.310306	28.8802	29.1873	29.7425	28.8709	28.4209	29.5119
GDPD1	Lysophospholipase D GDPD1	Q9CRY7	-0.589035	28.8862	29.2121	29.72	28.6708	27.4762	29.4177
DDX19A	ATP-dependent RNA helicase DDX19A	Q61655	-0.572747	29.0951	29.4013	29.7137	28.8481	28.1105	29.3435
WDR1	WD repeat-containing protein 1	O88342	-0.112704	28.6729	28.8687	29.6979	28.8632	28.1784	29.684
GMDS	GDP-mannose 4,6 dehydratase	Q8K0C9	-0.436667	28.9999	29.2327	29.693	28.6809	28.1378	29.5357
HSPH1	Heat shock protein 105 kDa	Q61699	-0.304071	29.2642	29.2476	29.5509	28.7639	28.4289	29.677
AKR1A1	Aldo-keto reductase family 1 member A1	Q9JII6	-0.533431	28.894	29.2197	29.6536	28.5027	28.0423	29.3897
VAPA	Vesicle-associated membrane protein-associated protein A	Q9WV55	-0.354254	28.935	29.4686	29.6367	28.9452	28.0521	29.6466
MARCHF5	E3 ubiquitin-protein ligase MARCHF5	Q3KNM2	-0.447409	28.7286	29.5825	29.6441	28.9673	28.5386	29.1991
MDH2	Malate dehydrogenase, mitochondrial	P08249	-0.359557	28.8763	29.4292	29.5655	28.6982	28.2056	29.614
PDIA6	Protein disulfide-isomerase A6	Q922R8	-0.743675	28.4302	29.1605	29.5683	28.2971	27.3077	29.0449
EIF4A1	Eukaryotic initiation factor 4A-I	P60843	-0.307299	28.8297	29.1423	29.552	28.6713	28.1063	29.5464
YWHAE	14-3-3 protein epsilon	P62259	-0.493874	29.0676	29.0663	29.5514	28.7263	27.872	29.3145
LDHA	L-lactate dehydrogenase A chain	P06151	0.579367	23.3567	29.1913	29.0118	28.6671	29.51	29.0349
ZAR1	Zygote arrest protein 1	Q80SU3	-0.577463	28.8771	29.0345	29.5081	28.1986	27.9646	29.2548
LDHC	L-lactate dehydrogenase C chain	P00342	-0.513261	28.6705	29.1331	29.4967	28.591	28.0764	29.0485
NSF	Vesicle-fusing ATPase	P46460	-0.535461	28.562	29.0767	29.4929	28.517	27.6902	29.123
IGF2BP2	Insulin-like growth factor 2 mRNA-binding protein 2	Q5SF07	-0.410302	28.9336	29.0176	29.4915	28.697	28.0048	29.2939
CFL1	Cofilin-1	P18760	-0.528604	28.6619	29.0158	29.4778	28.1537	27.6568	29.3384
PDIA4	Protein disulfide-isomerase A4	P08003	-0.443527	28.8216	29.1058	29.4706	28.616	28.012	29.2504
SPIN1	Spindlin-1	Q61142	-1.09485	28.2978	28.779	29.4624	27.9268	26.9537	28.3038
MIOX	Inositol oxygenase	Q9QXN5	-0.780283	28.542	29.0114	29.4536	27.8531	27.5026	29.0033
CPEB1	Cytoplasmic polyadenylation element-binding protein 1	P70166	-0.459952	28.8879	29.0288	29.4528	28.3948	27.842	29.3828
AASS	Alpha-aminoadipic semialdehyde synthase, mitochondrial	Q99K67	-0.545322	28.02	28.6873	29.4451	28.1853	27.4311	28.8897
CTTN	Src substrate cortactin	Q60598	2.09912	25.7939	25.5972	26.2993	29.4346	24.482	26.0918
SKP1	S-phase kinase-associated protein 1	Q9WTX5	-0.915212	28.6086	28.8672	29.4283	27.6198	26.8495	28.9885
SUGT1	Protein SGT1 homolog	Q9CX34	-0.459826	28.5004	28.9859	29.4192	28.2116	27.8406	29.2386
HYOU1	Hypoxia up-regulated protein 1	Q9JKR6	-0.631233	28.3997	29.0592	29.4166	28.2863	27.5477	28.9783
CCT2	T-complex protein 1 subunit beta	P80314	-0.50905	28.5066	28.8151	29.3615	28.1406	27.4251	29.1805
NLRP4A	NACHT, LRR and PYD domains-containing protein 4A	Q8BU40	-1.06236	28.3978	28.9203	29.3535	28.0963	26.2962	28.4695
GSTM5	Glutathione S-transferase Mu 5	P48774	-1.00719	28.0179	28.5613	29.2981	27.4968	26.8737	28.3759
KRT79	Keratin, type II cytoskeletal 79	Q8VED5	0.317006	27.1241	26.9253	28.5038	29.2862	25.8476	26.5765
NCEH1	Neutral cholesterol ester hydrolase 1	Q8BLF1	-1.61141	26.8468	27.2605	29.2593	26.6497	25.4976	27.1581
GDA	Guanine deaminase	Q9R111	-0.539462	28.2371	28.7646	29.244	28.207	27.1534	28.9252
KRT15	Keratin, type I cytoskeletal 15	Q61414	-0.281289	27.6432	27.9389	29.2242	29.2364	26.174	27.517
ACOX3	Peroxisomal acyl-coenzyme A oxidase 3	Q9EPL9	-0.656151	28.3965	28.8627	29.2262	28.2262	27.2269	28.7815
RAB14	Ras-related protein Rab-14	Q91V41	-0.36471	28.6146	28.9371	29.2152	28.4926	27.7578	29.155
MVP	Major vault protein	Q9EQK5	-0.612841	28.429	28.8976	29.1967	28.1972	27.3129	28.8718
MAGI1	Membrane-associated guanylate kinase, WW and PDZ domain-containing protein 1	Q6RHR9	0.109493	24.3369	24.855	29.0015	23.9559	23.7596	29.1722
PGK1	Phosphoglycerate kinase 1	P09411	-0.454901	28.4289	28.7283	29.1382	28.0829	27.6862	28.9508
CANX	Calnexin	P35564	-0.490557	28.3739	28.7474	29.1382	28.0503	26.863	29.1332
VCP	Transitional endoplasmic reticulum ATPase	Q01853	-0.325437	28.4232	28.7849	29.1381	28.2689	27.8171	29.0813
CHCHD2	Coiled-coil-helix-coiled-coil-helix domain-containing protein 2	Q9D1L0	-0.810897	28.4098	28.7859	29.1363	27.5867	27.4231	28.6524
TUBA1C	Tubulin alpha-1C chain	P68373	-1.54328	28.776	28.5	29.1345	27.9954	25.2504	27.4447
CAND1	Cullin-associated NEDD8-dissociated protein 1	Q6ZQ38	-0.477555	28.3591	28.7865	29.1283	28.2389	27.5203	28.8739
INPP5K	Inositol polyphosphate 5-phosphatase K	Q8C5L6	-1.97215	2	2	29.1272	28.1048	23.2851	2
P4HB	Protein disulfide-isomerase	P09103	-0.487462	28.1339	28.6441	29.1213	28.1188	27.2244	28.8311
OAS1B	Inactive 2'-5'-oligoadenylate synthase 1B	Q60856	-0.549193	27.7345	28.3211	29.1042	27.622	2	28.2118
TUBB6	Tubulin beta-6 chain	Q922F4	-1.31928	29.0626	28.4245	29.0822	27.9935	26.557	27.7824
STIP1	Stress-induced-phosphoprotein 1	Q60864	-0.486569	28.3122	28.6612	29.0794	28.2938	27.272	28.7599
OTUB1	Ubiquitin thioesterase OTUB1	Q7TQI3	-0.816433	28.4272	28.4755	29.0698	27.5295	26.6245	28.7119
ANXA6	Annexin A6	P14824	-0.364978	28.363	28.6504	28.8679	27.9487	27.2044	29.0658
OGDH	2-oxoglutarate dehydrogenase complex component E1	Q60597	-0.342637	28.1896	28.7421	29.0485	28.3204	27.5169	28.9149
PEBP1	Phosphatidylethanolamine-binding protein 1	P70296	-0.841088	28.1486	28.3944	29.0476	27.5137	27.0665	28.3436
PPIA	Peptidyl-prolyl cis-trans isomerase A	P17742	-0.125127	28.3521	27.7422	29.0466	28.0548	27.6022	29.024
ECPAS	Proteasome adapter and scaffold protein ECM29	Q6PDI5	-0.649249	28.1998	28.6943	29.045	27.95	27.0723	28.6672
PFN1	Profilin-1	P62962	-0.870498	28.4184	28.4842	29.0204	26.5547	26.3021	28.9487
TCP1	T-complex protein 1 subunit alpha	P11983	-0.451926	28.2044	28.5386	29.018	27.9948	27.4637	28.7645
NUP85	Nuclear pore complex protein Nup85	Q8R480	3.20359	2	2	24.2378	22.6398	22.1966	28.9961
TKT	Transketolase	P40142	-0.501055	28.2581	28.5321	28.9921	27.9263	27.4352	28.7189
RNF114	E3 ubiquitin-protein ligase RNF114	Q9ET26	-0.977084	28.5335	28.5527	28.9788	27.9988	26.5914	28.1451
CS	Citrate synthase, mitochondrial	Q9CZU6	-0.29705	28.1213	28.5549	28.9676	27.9144	27.6104	28.976
SOD1	Superoxide dismutase [Cu-Zn]	P08228	-0.827323	28.0546	28.4519	28.968	27.7731	26.9015	28.1855
MFGE8	Lactadherin	P21956	-0.710888	28.5182	28.7888	28.9504	27.9267	27.2538	28.6456
CCT4	T-complex protein 1 subunit delta	P80315	-0.457255	28.1303	28.4475	28.9322	27.8747	27.2492	28.7391
CARHSP1	Calcium-regulated heat stable protein 1	Q9CR86	-0.832942	28.1628	28.7484	28.9268	27.9063	26.6525	28.3881
KPNB1	Importin subunit beta-1	P70168	-0.543913	28.0894	28.6408	28.9137	27.9259	27.3052	28.6075
TUBB5	Tubulin beta-5 chain	P99024	-1.10119	28.3915	28.0497	28.908	27.4116	26.8118	27.7901
EEF1G	Elongation factor 1-gamma	Q9D8N0	-0.425529	28.3349	28.5945	28.8952	28.2197	27.3876	28.7045
MYH9	Myosin-9	Q8VDD5	-0.315769	28.1896	28.3695	28.8923	27.9941	27.3363	28.8626
TXNRD1	Thioredoxin reductase 1, cytoplasmic	Q9JMH6	-0.629123	28.1417	28.4266	28.8908	27.6648	27.4332	28.3933
KRT10	Keratin, type I cytoskeletal 10	P02535	-0.213083	27.092	27.3348	28.8861	28.6992	25.7948	27.5998
CCT8	T-complex protein 1 subunit theta	P42932	-0.50622	28.1433	28.3481	28.863	27.7975	27.1723	28.6058
TACC3	Transforming acidic coiled-coil-containing protein 3	Q9JJ11	-0.50975	28.2032	28.6372	28.8579	27.9848	26.9439	28.7685
HSPA4	Heat shock 70 kDa protein 4	Q61316	-0.402392	28.2152	28.3038	28.846	27.8997	27.0497	28.784
CYB5R3	NADH-cytochrome b5 reductase 3	Q9DCN2	-0.743717	27.6903	28.4567	28.843	27.7408	26.4637	28.2538
PHB2	Prohibitin-2	O35129	-0.436676	27.9877	28.4619	28.8413	27.9905	27.1178	28.621
SLC25A31	ADP/ATP translocase 4	Q3V132	-0.359771	27.9416	28.5255	28.8287	28.1316	27.2506	28.6451
FAM151A	Protein FAM151A	Q8QZW3	-0.506962	27.943	28.361	28.8229	27.5932	27.2316	28.5692
CCT7	T-complex protein 1 subunit eta	P80313	-0.58488	28.1563	28.4045	28.8198	27.7394	26.7266	28.6358
CCT5	T-complex protein 1 subunit epsilon	P80316	-0.577064	28.1799	28.4484	28.8189	27.8201	27.2114	28.4801
CCT3	T-complex protein 1 subunit gamma	P80318	-0.493184	28.1461	28.4399	28.8171	27.7546	27.1612	28.6771
RAB35	Ras-related protein Rab-35	Q6PHN9	0.424533	26.5823	27.5834	27.738	28.814	22.1359	27.7688
VAT1	Synaptic vesicle membrane protein VAT-1 homolog	Q62465	-0.809914	27.7807	28.4837	28.8021	27.4764	26.5498	28.2876
LCP1	Plastin-2	Q61233	-0.643984	28.1842	28.34	28.7916	27.5615	27.0365	28.4793
TUFM	Elongation factor Tu, mitochondrial	Q8BFR5	-1.37755	26.2793	26.8008	28.768	26.0902	25.4643	27.0034
ARHGDIA	Rho GDP-dissociation inhibitor 1	Q99PT1	-0.287493	28.0222	28.2351	28.7429	28.0771	27.1645	28.6344
APEH	Acylamino-acid-releasing enzyme	Q8R146	-0.511981	27.9289	28.2415	28.719	27.6117	27.361	28.3158
NAP1L4	Nucleosome assembly protein 1-like 4	Q78ZA7	-0.852336	27.9113	28.2798	28.7163	27.2796	26.6246	28.1518
SYPL1	Synaptophysin-like protein 1	O09117	-1.11305	27.1961	27.8623	28.7074	26.5729	25.4303	27.8475
MYO5B	Unconventional myosin-Vb	P21271	-0.690528	26.2806	26.4867	28.6949	27.569	25.3481	27.0213
RAB11B	Ras-related protein Rab-11B	P46638	-0.103733	28.0567	28.2939	28.6643	28.3672	27.7577	28.5344
DAGLB	Diacylglycerol lipase-beta	Q91WC9	-0.470997	27.6282	28.2363	28.6524	27.6259	26.7935	28.4185
SLC25A3	Phosphate carrier protein, mitochondrial	Q8VEM8	-0.585837	28.1576	27.9339	28.6197	27.4562	26.8656	28.3355
EIF4E1B	Eukaryotic translation initiation factor 4E type 1B	Q3UTA9	-0.783334	27.9691	28.2755	28.6111	27.4079	26.6468	28.1436
TTC22	Tetratricopeptide repeat protein 22	Q8C159	-0.979014	27.7321	26.6596	28.6022	26.2135	27.3517	2
CCT6A	T-complex protein 1 subunit zeta	P80317	-0.337167	27.8648	28.2035	28.5957	27.6682	27.0487	28.601
PTGES3	Prostaglandin E synthase 3	Q9R0Q7	-1.65049	26.5157	28.2794	28.5951	26.3078	25.6808	26.9163
APOO	MICOS complex subunit Mic26	Q9DCZ4	0.053047	28.1676	28.4444	26.8791	28.5881	24.9886	28.5126
TUBA3A	Tubulin alpha-3 chain	P05214	-0.086036	27.6188	28.0633	28.2441	28.5761	25.5344	28.2037
EIF4ENIF1	Eukaryotic translation initiation factor 4E transporter	Q9EST3	-0.626977	28.0757	28.2154	28.5462	27.5856	26.795	28.2578
EEA1	Early endosome antigen 1	Q8BL66	0.318214	27.0411	28.2785	27.4962	27.8907	27.3759	28.5431
DDX4	ATP-dependent RNA helicase DDX4	Q61496	-3.04077	24.5246	27.907	28.5395	23.7881	23.4345	25.7157
RUFY1	RUN and FYVE domain-containing protein 1	Q8BIJ7	-0.54358	27.8529	28.2476	28.5323	27.6806	26.9714	28.1823
PPP2R1A	Serine/threonine-protein phosphatase 2A 65 kDa regulatory subunit A alpha isoform	Q76MZ3	-0.71138	26.936	27.6053	28.5063	26.7103	26.3592	27.8391
RPN2	Dolichyl-diphosphooligosaccharide--protein glycosyltransferase subunit 2	Q9DBG6	-0.75064	27.3713	27.4271	28.4936	27.1396	26.5944	27.4699
COPS6	COP9 signalosome complex subunit 6	O88545	-0.735349	27.5798	28.0335	28.4813	27.0735	26.4362	28.0536
CFL2	Cofilin-2	P45591	-0.462532	27.9066	28.219	28.4769	27.3788	26.9682	28.4809
SLC25A5	ADP/ATP translocase 2	P51881	-0.133081	27.4958	27.958	28.2669	27.5779	26.9601	28.4783
AK4	Adenylate kinase 4, mitochondrial	Q9WUR9	-0.855007	27.5007	27.9013	28.4748	26.9325	25.9573	27.9349
PLS1	Plastin-1	Q3V0K9	-0.4272	27.7187	28.0301	28.4728	27.5201	26.8102	28.3197
COX4I1	Cytochrome c oxidase subunit 4 isoform 1, mitochondrial	P19783	-0.985376	28.1484	28.3279	28.4678	26.8874	26.458	28.1196
HSPA9	Stress-70 protein, mitochondrial	P38647	-0.841176	27.8898	28.0245	28.4672	27.1427	26.4397	27.9493
GSTP1	Glutathione S-transferase P 1	P19157	-0.722972	28.2656	28.3018	28.4298	27.3221	26.1903	28.4656
GPS1	COP9 signalosome complex subunit 1	Q99LD4	-0.853039	27.832	27.8985	28.4619	26.8145	26.0689	28.0968
RHPN2	Rhophilin-2	Q8BWR8	-0.638981	27.1185	28.1108	28.4587	27.1802	26.3525	28.0549
DNAJA4	DnaJ homolog subfamily A member 4	Q9JMC3	0.0565075	27.3546	27.7549	28.1228	27.7091	26.9664	28.4529
ISYNA1	Inositol-3-phosphate synthase 1	Q9JHU9	-0.419986	27.8004	27.772	28.4515	27.1686	26.8233	28.3861
NLRP4B	NACHT, LRR and PYD domains-containing protein 4B	Q8C6J9	-0.432303	27.4877	28.0709	28.4506	27.5156	26.5914	28.286
CAND2	Cullin-associated NEDD8-dissociated protein 2	Q6ZQ73	-0.607111	27.6507	27.9198	28.4499	27.2252	26.589	28.1011
GSTA4	Glutathione S-transferase A4	P24472	-0.688557	27.912	28.1134	28.4496	27.166	27.1553	27.9776
ARF3	ADP-ribosylation factor 3	P61205	-0.366245	27.4195	28.2529	28.3834	27.1958	27.0889	28.4338
VDAC2	Voltage-dependent anion-selective channel protein 2	Q60930	-0.823047	27.8288	28.0437	28.4262	27.3981	26.7311	27.6234
MECR	Enoyl-[acyl-carrier-protein] reductase, mitochondrial	Q9DCS3	-0.359591	27.7203	28.1744	28.426	27.5855	27.0435	28.3819
GANAB	Neutral alpha-glucosidase AB	Q8BHN3	-0.430475	27.6304	28.009	28.4158	27.5565	26.744	28.2101
G3BP2	Ras GTPase-activating protein-binding protein 2	P97379	-0.747663	27.9134	28.2432	28.4151	27.3419	26.4896	28.1046
ARG2	Arginase-2, mitochondrial	O08691	-0.668415	27.3819	27.5352	28.4091	27.1035	26.098	27.8425
TUBB2B	Tubulin beta-2B chain	Q9CWF2	-1.00093	27.7609	27.747	28.406	26.9593	26.3142	27.5014
ACTN4	Alpha-actinin-4	P57780	-0.233575	27.4499	28.062	28.2441	27.4732	26.8855	28.4007
PAFAH1B1	Platelet-activating factor acetylhydrolase IB subunit beta	P63005	-0.818697	28.1731	28.2737	28.3972	27.4178	26.7897	27.9578
PPIB	Peptidyl-prolyl cis-trans isomerase B	P24369	-0.207861	27.7013	28.2785	28.3589	27.8854	27.3312	28.3916
COPB2	Coatomer subunit beta'	O55029	-1.18503	27.5738	28.0218	28.3887	26.8704	25.705	27.4622
COPS2	COP9 signalosome complex subunit 2	P61202	-0.773329	27.5421	28.0051	28.3807	27.0331	26.4213	27.8929
THOP1	Thimet oligopeptidase	Q8C1A5	-0.612917	27.9592	27.6658	28.3753	27.062	27.0455	27.9478
VDAC1	Voltage-dependent anion-selective channel protein 1	Q60932	-0.349005	26.5579	27.0453	28.3605	27.6876	26.1846	27.2931
DCAKD	Dephospho-CoA kinase domain-containing protein	Q8BHC4	-0.545177	27.5276	28.0115	28.3592	27.3394	26.5186	28.1017
IMMT	MICOS complex subunit Mic60	Q8CAQ8	-0.499713	27.4597	28.0449	28.3572	27.5293	26.5807	28.0376
DCAF8	DDB1- and CUL4-associated factor 8	Q8N7N5	-0.609014	27.1052	27.7431	28.3286	27.1764	26.3383	27.7545
AKR7A2	Aflatoxin B1 aldehyde reductase member 2	Q8CG76	-0.796484	27.8615	28.1115	28.3281	26.8957	26.6297	28.0227
KPNA2	Importin subunit alpha-1	P52293	-0.488622	27.414	27.4162	28.2948	27.3016	26.5991	27.7306
FDFT1	Squalene synthase	P53798	-1.13657	25.8203	28.2941	27.6462	27.2952	24.5413	26.308
DLST	Dihydrolipoyllysine-residue succinyltransferase component of 2-oxoglutarate dehydrogenase complex, mitochondrial	Q9D2G2	-0.415269	27.3524	27.8387	28.2899	27.4182	26.8535	27.9202
RPN1	Dolichyl-diphosphooligosaccharide--protein glycosyltransferase subunit 1	Q91YQ5	-0.462782	27.4089	27.4896	28.2859	27.1698	26.5582	27.9185
DNAJA1	DnaJ homolog subfamily A member 1	P63037	-0.215048	27.2967	27.8524	28.0532	27.3294	26.5111	28.2824
AIFM1	Apoptosis-inducing factor 1, mitochondrial	Q9Z0X1	-0.339879	27.3568	27.7068	28.2626	27.4742	26.527	28.0618
GJA1	Gap junction alpha-1 protein	P23242	-0.75633	26.8526	28.2593	27.8102	26.8391	26.3775	27.5318
OPA1	Dynamin-like 120 kDa protein, mitochondrial	P58281	-0.386345	27.8139	27.5255	27.8817	26.6676	26.427	28.2566
EIF2S3X	Eukaryotic translation initiation factor 2 subunit 3, X-linked	Q9Z0N1	-0.525882	27.4938	27.8551	28.2532	27.2774	26.5882	27.9457
RPSA	40S ribosomal protein SA	P14206	-0.297947	27.4018	27.527	28.2471	27.7289	26.5822	27.825
HSD17B4	Peroxisomal multifunctional enzyme type 2	P51660	-0.573262	27.5199	27.8863	28.2353	27.3174	26.4965	27.8772
EEF1D	Elongation factor 1-delta	P57776	-0.978643	27.2626	28.1376	28.2277	27.1208	25.6701	27.5145
KRT73	Keratin, type II cytoskeletal 73	Q6NXH9	-0.264664	25.3804	24.1641	28.2074	28.1132	23.4152	23.0146
MTCO2	Cytochrome c oxidase subunit 2	P00405	-0.966839	27.3872	28.0225	28.2073	26.9456	25.8453	27.5634
FBP1	Fructose-1,6-bisphosphatase 1	Q9QXD6	-0.910726	27.5084	27.9424	28.2037	26.9081	26.1514	27.5949
GDF9	Growth/differentiation factor 9	Q07105	-0.783941	26.8417	27.7529	28.1952	26.7964	25.4156	27.7023
ADA	Adenosine deaminase	P03958	-1.10344	27.7456	27.7095	28.193	26.6119	25.9417	27.4448
RPS3	40S ribosomal protein S3	P62908	-0.445431	27.651	27.687	28.1891	27.1048	26.6109	28.1182
NEXN	Nexilin	Q7TPW1	-0.743949	27.5397	27.8631	28.1856	27.2603	26.3016	27.5833
KRT2	Keratin, type II cytoskeletal 2 epidermal	Q3TTY5	-0.245442	26.0394	25.6721	28.1835	28.1093	24.2483	25.6026
PSMC2	26S proteasome regulatory subunit 7	P46471	-0.427944	26.3999	27.4919	28.1822	27.0321	26.0155	27.761
TOMM34	Mitochondrial import receptor subunit TOM34	Q9CYG7	-0.036856	27.4096	27.6931	28.0958	27.7453	27.0142	28.1814
HSD17B10	3-hydroxyacyl-CoA dehydrogenase type-2	O08756	-0.662752	27.4285	27.8606	28.163	27.0816	26.3971	27.7613
GGCT	Gamma-glutamylcyclotransferase	Q9D7X8	-1.03827	28.1382	27.0203	28.0082	26.8644	26.2722	27.0437
IDH1	Isocitrate dehydrogenase [NADP] cytoplasmic	O88844	-0.673282	27.2567	27.6618	28.1331	26.9309	26.2615	27.6453
MYH11	Myosin-11	O08638	-0.558032	27.8609	27.7197	28.1311	27.4048	27.0584	27.5604
VAPB	Vesicle-associated membrane protein-associated protein B	Q9QY76	-0.68487	27.5858	26.9643	28.1308	27.0898	25.9164	27.4505
MDH1	Malate dehydrogenase, cytoplasmic	P14152	-0.24371	26.7281	27.8167	28.1094	27.432	26.5503	27.9471
PSMF1	Proteasome inhibitor PI31 subunit	Q8BHL8	-0.473758	27.3219	27.4865	28.1076	27.3141	26.0148	27.7759
RAB3D	Ras-related protein Rab-3D	P35276	-0.300807	27.129	27.06	28.0633	26.8649	25.5662	28.1041
ATP6V1A	V-type proton ATPase catalytic subunit A	P50516	-0.37439	27.3426	27.6485	28.0995	27.295	26.453	27.9479
PEX26	Peroxisome assembly protein 26	Q8BGI5	0.0518011	27.9018	28.0978	2	2	2	28.0549
SERPINB6	Serpin B6	Q60854	-2.88065	28.0888	23.6437	23.0448	23.5547	23.7729	23.8445
NIPSNAP2	Protein NipSnap homolog 2	O55126	-0.619635	26.8893	27.5592	28.0817	26.8597	26.477	27.4179
PILRB2	Paired immunoglobulin-like type 2 receptor beta-2	Q2YFS1	-0.667769	2	2	27.7563	28.0712	2	21.6997
PARK7	Parkinson disease protein 7 homolog	Q99LX0	-0.782134	27.9846	27.981	27.9925	27.0869	25.2319	28.0703
H4C	Histone H4	P62806	-0.364511	26.1442	26.7723	28.0619	26.8501	25.83	27.4525
DNAJA2	DnaJ homolog subfamily A member 2	Q9QYJ0	-0.321806	27.4684	27.833	28.0614	27.4438	26.7014	28.0205
PABPC1	Polyadenylate-binding protein 1	P29341	-0.505746	27.6281	27.6876	28.0585	27.1238	26.6705	27.8515
H1-3	Histone H1.3	P43277	0.352593	27.3057	27.0332	26.6972	25.323	27.6097	28.0574
COPS3	COP9 signalosome complex subunit 3	O88543	-0.625937	27.2454	27.579	28.0523	26.9196	25.9461	27.7247
BMP15	Bone morphogenetic protein 15	Q9Z0L4	-0.824999	27.3999	27.7388	28.0508	26.9338	26.0878	27.4539
UBE2K	Ubiquitin-conjugating enzyme E2 K	P61087	-0.472026	26.9293	27.5936	28.0502	26.979	26.1175	27.7986
YWHAB	14-3-3 protein beta/alpha	Q9CQV8	-0.725213	27.2617	27.7675	28.0485	26.7994	26.0123	27.7063
YBX3	Y-box-binding protein 3	Q9JKB3	-0.177525	27.3078	27.4347	27.847	26.8986	26.8195	28.0466
IGF2BP3	Insulin-like growth factor 2 mRNA-binding protein 3	Q9CPN8	-0.601197	27.0649	27.5849	28.0409	26.8863	26.0909	27.6581
GAK	Cyclin-G-associated kinase	Q99KY4	-0.704973	27.6652	27.8569	24.8303	23.7905	23.1156	28.0317
DNM1L	Dynamin-1-like protein	Q8K1M6	-0.375899	27.3269	27.6899	28.0225	27.1918	26.437	27.9681
SORBS2	Sorbin and SH3 domain-containing protein 2	Q3UTJ2	3.49294	23.5466	23.7583	23.27	21.4161	2	28.0169
LONP1	Lon protease homolog, mitochondrial	Q8CGK3	-0.463508	27.3363	27.7539	28.0083	27.2532	26.2139	27.8684
PHB1	Prohibitin 1	P67778	-0.268205	27.1268	27.3827	27.9975	27.2035	26.4356	27.8635
CLU	Clusterin	Q06890	-0.548442	27.1262	27.5446	27.9946	26.9557	26.1184	27.6722
PSMD2	26S proteasome non-ATPase regulatory subunit 2	Q8VDM4	-0.447396	27.4414	27.7072	27.992	27.0006	26.4172	27.9882
UQCRC2	Cytochrome b-c1 complex subunit 2, mitochondrial	Q9DB77	-0.685154	27.4237	27.4477	27.9854	26.9228	26.3195	27.4244
RAB1B	Ras-related protein Rab-1B	Q9D1G1	-0.410491	27.1812	27.6236	27.9659	27.2197	26.3076	27.7642
GLRX	Glutaredoxin-1	Q9QUH0	1.11882	24.9322	25.1312	25.8419	23.5733	22.4175	27.9643
FH	Fumarate hydratase, mitochondrial	P97807	-0.532529	27.2227	27.5686	27.9577	27.0237	26.3347	27.6113
PSMD5	26S proteasome non-ATPase regulatory subunit 5	Q8BJY1	-0.448512	27.1976	27.6149	27.9557	27.0574	26.1592	27.8359
MAP4	Microtubule-associated protein 4	P27546	-0.680279	27.2275	27.711	27.948	26.9072	26.2412	27.5134
ASPSCR1	Tether containing UBX domain for GLUT4	Q8VBT9	-0.847206	27.4657	27.8109	27.9454	26.427	26.4287	27.5539
PTPN11	Tyrosine-protein phosphatase non-receptor type 11	P35235	-1.5304	25.812	25.6505	27.939	25.1787	25.2457	25.5737
TUBB3	Tubulin beta-3 chain	Q9ERD7	-1.19897	27.4688	27.3102	27.9362	24.9951	25.3278	27.4992
DPPA3	Developmental pluripotency-associated protein 3	Q8QZY3	-0.726486	26.9986	27.1319	27.9332	26.2543	26.1311	27.3518
LYPLAL1	Lysophospholipase-like protein 1	Q3UFF7	0.109767	26.5831	27.1047	27.708	26.3565	27.9314	27.2435
ARL8B	ADP-ribosylation factor-like protein 8B	Q9CQW2	-0.438487	27.1011	27.7458	27.9295	27.1281	26.7296	27.5967
CDV3	Protein CDV3	Q4VAA2	-0.335674	27.3173	27.7362	27.8733	27.1135	26.6492	27.9207
AHCY	Adenosylhomocysteinase	P50247	-0.597111	27.1382	27.6367	27.9182	26.7878	26.2475	27.6303
PYCR3	Pyrroline-5-carboxylate reductase 3	Q9DCC4	-0.664172	27.3423	27.4029	27.9168	26.8377	26.5931	27.2362
LYPLA1	Acyl-protein thioesterase 1	P97823	0.741265	2	27.2887	23.8416	27.9043	27.4058	24.2378
RAB3A	Ras-related protein Rab-3A	P63011	-0.974133	26.4195	26.9687	27.8954	26.3001	22.4604	27.1723
RACK1	Receptor of activated protein C kinase 1	P68040	-0.360312	27.353	27.6127	27.8878	26.9539	26.9015	27.7865
HNRNPA1	Heterogeneous nuclear ribonucleoprotein A1	P49312	-0.349496	27.3391	27.4088	27.8139	26.9353	26.2842	27.8871
MGST3	Microsomal glutathione S-transferase 3	Q9CPU4	0.156212	26.3043	26.0855	27.4633	26.4803	25.1554	27.8794
COPA	Coatomer subunit alpha	Q8CIE6	-0.505675	27.2329	27.5992	27.8786	27.139	26.2116	27.5941
PLCH1	1-phosphatidylinositol 4,5-bisphosphate phosphodiesterase eta-1	Q4KWH5	0.463734	26.7284	26.8991	2	26.79	26.9186	27.8741
DNAJC7	DnaJ homolog subfamily C member 7	Q9QYI3	-0.472045	27.1976	27.4098	27.8689	26.9759	26.1923	27.629
AKAP1	A-kinase anchor protein 1, mitochondrial	O08715	-0.410286	26.7895	27.5396	27.8652	27.1684	25.3124	27.7489
RPL18	60S ribosomal protein L18	P35980	-0.250566	26.3233	27.4643	27.8635	27.2637	25.8649	27.6406
TUBA4A	Tubulin alpha-4A chain	P68368	-1.57502	26.808	27.0504	27.8629	25.6651	25.3324	26.1127
LARP4B	La-related protein 4B	Q6A0A2	-0.554673	24.7716	27.8617	25.1827	27.1498	24.1346	25.3963
RAB2A	Ras-related protein Rab-2A	P53994	-0.419519	26.9338	27.3489	27.848	26.8714	25.9861	27.6801
DYNLL2	Dynein light chain 2, cytoplasmic	Q9D0M5	-0.693396	27.0373	27.1191	27.842	25.939	25.5195	27.6572
PCBP1	Poly(rC)-binding protein 1	P60335	-0.586394	27.3595	27.3344	27.8414	26.7136	26.0462	27.6335
COPS5	COP9 signalosome complex subunit 5	O35864	-1.01161	26.6453	27.1528	27.828	26.2843	25.2566	26.8675
CPT2	Carnitine O-palmitoyltransferase 2, mitochondrial	P52825	-0.650198	27.0254	27.4931	27.8214	26.8783	26.0796	27.2914
AK2	Adenylate kinase 2, mitochondrial	Q9WTP6	-0.60759	27.3414	27.4454	27.7977	27.2126	25.9051	27.3092
YWHAQ	14-3-3 protein theta	P68254	-0.179032	26.7361	26.9696	27.6848	26.3908	26.3355	27.794
SUMO3	Small ubiquitin-related modifier 3	Q9Z172	-0.93681	26.1315	27.331	27.7897	26.2842	26.3731	26.2384
RARS1	Arginine--tRNA ligase, cytoplasmic	Q9D0I9	-0.390727	26.9184	27.1741	27.7837	26.6359	26.0665	27.6726
ACTR2	Actin-related protein 2	P61161	-0.52821	27.0952	27.4004	27.7722	26.7761	26.0047	27.5679
VPS35	Vacuolar protein sorting-associated protein 35	Q9EQH3	-0.375674	26.8672	27.1276	27.7528	26.7195	26.1285	27.5597
RPS2	40S ribosomal protein S2	P25444	-0.376308	26.2797	26.7299	27.7507	26.6851	25.5004	27.3164
CUL4B	Cullin-4B	A2A432	-0.766561	27.1223	27.4382	27.7466	26.5474	25.5973	27.3935
ANKRD26	Ankyrin repeat domain-containing protein 26	Q811D2	-4.65463	26.5661	27.7436	2	22.3264	23.2605	21.9287
IgK	Ig kappa chain V-II region 26-10	P01631	-0.133487	27.3385	2	2	27.2477	26.2558	27.7431
YWHAH	14-3-3 protein eta	P68510	-0.655935	26.8039	27.3221	27.7374	26.4729	26.0457	27.2576
COPB1	Coatomer subunit beta	Q9JIF7	-0.533563	26.9159	27.2492	27.7372	26.7963	25.7785	27.4085
EDC4	Enhancer of mRNA-decapping protein 4	Q3UJB9	-0.533807	26.6525	27.244	27.7339	26.7388	25.7968	27.3114
NACA	Nascent polypeptide-associated complex subunit alpha, muscle-specific form	P70670	-1.00192	26.8658	27.1278	27.7306	25.6289	24.7586	27.2999
SLC45A3	Solute carrier family 45 member 3	Q8K0H7	-0.78703	26.779	27.3961	27.7266	26.8257	25.6274	26.9206
QDPR	Dihydropteridine reductase	Q8BVI4	-0.0771962	26.2874	27.0531	27.5012	26.4151	26.2283	27.7234
UBA6	Ubiquitin-like modifier-activating enzyme 6	Q8C7R4	-0.488411	27.3222	27.598	27.7143	26.7648	26.3674	27.7181
ADK	Adenosine kinase	P55264	-0.656007	26.9351	27.7174	27.4894	26.6807	25.9807	27.3177
RGN	Regucalcin	Q64374	-0.754615	26.6807	27.1533	27.7138	26.6929	25.7055	26.8324
ARF5	ADP-ribosylation factor 5	P84084	-0.623911	27.2352	27.4955	27.7123	26.4678	26.1485	27.5813
ACO1	Cytoplasmic aconitate hydratase	P28271	-0.675485	26.0853	26.1423	27.7104	25.8634	25.0262	26.9895
ADPRH	ADP-ribosylhydrolase ARH1	P54923	-0.390096	27.1969	27.0582	27.6411	26.4668	26.1015	27.7064
PTBP2	Polypyrimidine tract-binding protein 2	Q91Z31	-0.375469	27.2191	27.3805	27.6793	26.5708	26.625	27.6972
LRRC47	Leucine-rich repeat-containing protein 47	Q505F5	-0.769281	26.7493	27.2825	27.6962	26.6676	25.7093	26.9326
ARL8A	ADP-ribosylation factor-like protein 8A	Q8VEH3	1.10046	27.1099	26.4118	26.0597	2	2	27.6953
ATP2A2	Sarcoplasmic/endoplasmic reticulum calcium ATPase 2	O55143	-0.499446	27.1475	27.3372	27.6861	26.7762	26.0121	27.5408
SUB1	Activated RNA polymerase II transcriptional coactivator p15	P11031	-1.16439	26.8266	27.2012	27.6803	25.7999	25.0396	26.8973
AHSA1	Activator of 90 kDa heat shock protein ATPase homolog 1	Q8BK64	-0.486813	27.1588	27.2473	27.6795	26.8096	25.802	27.5601
USP9X	Probable ubiquitin carboxyl-terminal hydrolase FAF-X	P70398	-0.378561	26.917	27.1835	27.6791	26.6994	26.1581	27.5475
RBPMS2	RNA-binding protein with multiple splicing 2	Q8VC52	-0.62998	26.2598	27.2541	27.6778	26.5371	25.3537	27.1968
PCBP2	Poly(rC)-binding protein 2	Q61990	-0.572573	27.0119	27.2892	27.6746	26.4491	25.3491	27.6525
RAB7A	Ras-related protein Rab-7a	P51150	-0.415187	26.8376	27.2807	27.6725	26.7859	25.9414	27.5202
TXNDC5	Thioredoxin domain-containing protein 5	Q91W90	-0.702716	26.8795	27.133	27.6629	26.5393	25.5578	27.1598
PROX1	Prospero homeobox protein 1	P48437	-1.14722	26.6285	26.9903	27.65	24.1675	22.9754	27.3831
CDK5	Cyclin-dependent kinase 5	P49615	-0.947223	26.4789	27.311	27.6482	26.5406	25.5225	26.5483
EPRS1	Bifunctional glutamate/proline--tRNA ligase	Q8CGC7	-0.52781	26.9868	27.2091	27.6475	26.6071	26.02	27.3863
CORO1C	Coronin-1C	Q9WUM4	-0.63328	26.7632	27.3687	27.6457	26.5481	25.7745	27.298
GALM	Galactose mutarotase	Q8K157	-0.488011	26.8754	27.2295	27.6441	26.8548	25.8656	27.3155
PRDX5	Peroxiredoxin-5, mitochondrial	P99029	-0.674542	26.8733	27.047	27.6417	26.2728	25.3901	27.3413
GET3	ATPase GET3	O54984	-0.126226	27.2642	27.0786	27.4709	27.1225	26.4971	27.6262
AFG3L2	AFG3-like protein 2	Q8JZQ2	-0.407862	26.8808	27.3628	27.618	27.0385	26.0195	27.363
RAB1A	Ras-related protein Rab-1A	P62821	-0.507106	27.29	27.5417	27.5888	26.7581	26.1705	27.6177
RAB3GAP1	Rab3 GTPase-activating protein catalytic subunit	Q80UJ7	-0.947576	26.8216	27.4749	27.6137	26.5656	25.3971	26.8529
GARS1	Glycine--tRNA ligase	Q9CZD3	-0.494778	26.8935	27.2175	27.6119	26.4754	25.9139	27.4882
SLC30A3	Zinc transporter 3	P97441	1.88683	26.8615	21.2819	21.5477	27.1749	26.7877	27.6063
FLNB	Filamin-B	Q80X90	-0.719042	26.6999	27.0166	27.6023	26.3511	25.6474	27.0012
ATP1A1	Sodium/potassium-transporting ATPase subunit alpha-1	Q8VDN2	-0.474727	26.666	27.3497	27.5835	26.6331	26.0028	27.3671
DDOST	Dolichyl-diphosphooligosaccharide--protein glycosyltransferase 48 kDa subunit	O54734	-0.436499	26.4989	26.872	27.5827	26.3938	25.8144	27.273
DLAT	Dihydrolipoyllysine-residue acetyltransferase component of pyruvate dehydrogenase complex, mitochondrial	Q8BMF4	-0.330242	26.7903	27.145	27.5732	26.8842	25.9354	27.4327
SLC25A15	Mitochondrial ornithine transporter 1	Q9WVD5	-0.462328	26.5714	26.9838	27.571	26.3722	25.9061	27.2863
SLC25A4	ADP/ATP translocase 1	P48962	-0.73413	26.8104	26.2508	27.5696	26.0964	24.8617	27.0219
AKR1B8	Aldose reductase-related protein 2	P45377	-0.621959	27.0393	27.0369	27.5582	26.4192	26.4862	26.8831
ATG16L1	Autophagy-related protein 16-1	Q8C0J2	-0.510216	26.9222	27.3549	27.5423	26.7486	26.0611	27.2916
COPS4	COP9 signalosome complex subunit 4	O88544	-0.750346	26.7831	27.0477	27.5379	26.2986	25.2764	27.0993
ADSL	Adenylosuccinate lyase	P54822	-0.524611	26.7313	26.8784	27.5281	26.0444	25.6818	27.3804
C3	Complement C3	P01027	-1.76206	24.3328	27.521	25.6166	24.6285	24.2657	24.9349
UPP1	Uridine phosphorylase 1	P52624	-0.837219	26.6712	27.1949	27.5148	26.1671	2	26.4771
PITRM1	Presequence protease, mitochondrial	Q8K411	-0.307934	26.8036	27.3793	27.5098	26.7669	26.3265	27.5141
STAT3	Signal transducer and activator of transcription 3	P42227	-0.684565	26.692	27.0993	27.5057	26.3141	25.6623	27.05
ATG5	Autophagy protein 5	Q99J83	-0.658617	26.7492	26.985	27.5054	26.504	25.5582	26.973
ATP5PO	ATP synthase subunit O, mitochondrial	Q9DB20	-0.284385	26.7509	27.209	27.4976	26.9636	26.1123	27.3603
KRT5	Keratin, type II cytoskeletal 5	Q922U2	-0.624313	25.8432	25.4554	27.4928	27.0152	23.9002	25.2579
RPS4X	40S ribosomal protein S4, X isoform	P62702	-0.35992	26.15	26.3621	27.4885	26.4557	25.7557	26.8773
CAP1	Adenylyl cyclase-associated protein 1	P40124	-0.309741	26.1977	27.0575	27.4876	26.6587	25.859	27.2518
NASP	Nuclear autoantigenic sperm protein	Q99MD9	-0.42295	26.7891	27.1974	27.4815	26.8532	26.0898	27.145
DSTN	Destrin	Q9R0P5	-0.642349	26.5187	26.8714	27.4795	26.3752	25.8373	26.7537
MAT2B	Methionine adenosyltransferase 2 subunit beta	Q99LB6	-0.27573	26.5087	26.8499	27.474	26.6149	25.8348	27.3423
ARCN1	Coatomer subunit delta	Q5XJY5	-0.490044	26.8824	27.2501	27.4672	26.5995	25.9366	27.3234
RPL14	60S ribosomal protein L14	Q9CR57	-0.559931	26.7421	27.0913	27.4653	26.3659	25.7464	27.2175
RAB21	Ras-related protein Rab-21	P35282	-0.49197	27.0042	27.0986	27.4616	26.4879	26.0923	27.2861
VPS26A	Vacuolar protein sorting-associated protein 26A	P40336	-0.373948	26.8975	26.9649	27.4587	26.6633	25.838	27.3714
HARS1	Histidine--tRNA ligase, cytoplasmic	Q61035	-2.27287	25.7746	25.8095	27.4556	23.7449	23.2799	25.1753
PSMA4	Proteasome subunit alpha type-4	Q9R1P0	-0.759822	26.6328	26.216	27.4551	26.357	25.3854	26.364
EIF2S1	Eukaryotic translation initiation factor 2 subunit 1	Q6ZWX6	-0.602048	26.827	27.0533	27.4497	26.4562	25.8172	27.0583
ATL1	Atlastin-1	Q8BH66	-0.713107	26.5868	27.0759	27.444	26.2732	25.4371	26.9828
IDH3A	Isocitrate dehydrogenase [NAD] subunit alpha, mitochondrial	Q9D6R2	-0.65993	26.4643	27.1856	27.432	26.4306	25.2977	27.0414
PMPCB	Mitochondrial-processing peptidase subunit beta	Q9CXT8	4.47317	22.0277	2	2	26.6202	20.401	27.4262
COPG1	Coatomer subunit gamma-1	Q9QZE5	-0.582525	26.4654	27.0714	27.422	25.996	25.9387	27.1105
RAB10	Ras-related protein Rab-10	P61027	-0.64641	27.0597	26.8799	27.4145	25.8923	25.9825	27.1981
HADHB	Trifunctional enzyme subunit beta, mitochondrial	Q99JY0	-0.565522	26.6148	26.8924	27.4133	26.2807	25.3326	27.1663
MRPS36	Alpha-ketoglutarate dehydrogenase component 4	Q9CQX8	-0.543965	26.2752	26.5283	27.4048	26.0151	25.8396	26.7909
HADHA	Trifunctional enzyme subunit alpha, mitochondrial	Q8BMS1	-0.214	26.5612	26.7408	27.1298	26.084	25.837	27.404
GNPDA2	Glucosamine-6-phosphate isomerase 2	Q9CRC9	-0.0338664	26.3101	27.3574	27.2484	26.9464	26.5482	27.4034
RPL10A	60S ribosomal protein L10a	P53026	-0.480033	26.8355	27.1275	27.3961	26.5496	25.9884	27.1872
COPS7A	COP9 signalosome complex subunit 7a	Q9CZ04	-0.717702	26.4749	26.551	27.3883	25.6669	24.8615	27.0563
AFDN	Afadin	Q9QZQ1	-0.216458	26.8656	26.8599	27.1987	26.577	26.0095	27.3826
RPS3A	40S ribosomal protein S3a	P97351	-0.657227	26.5461	26.3042	27.379	26.5223	25.6085	26.2135
ACSL1	Long-chain-fatty-acid--CoA ligase 1	P41216	-0.517969	26.609	27.044	27.3782	26.441	25.3815	27.2089
EIF4G1	Eukaryotic translation initiation factor 4 gamma 1	Q6NZJ6	-0.275996	26.5939	26.8427	27.375	26.5278	26.4487	27.0449
RAD23B	UV excision repair protein RAD23 homolog B	P54728	-0.754339	26.5827	26.9258	27.3731	26.2225	25.3095	26.8182
NLRP9A	NACHT, LRR and PYD domains-containing protein 9A	Q66X03	-0.635018	26.6257	27.0749	27.3623	26.41	25.5938	26.9428
TPI1	Triosephosphate isomerase	P17751	-0.57579	26.7182	27.0908	27.3595	26.4989	25.9477	26.9083
USO1	General vesicular transport factor p115	Q9Z1Z0	-0.696526	26.1285	26.9128	27.3575	26.3706	25.0176	26.6945
CD81	CD81 antigen	P35762	-0.639857	26.2302	27.2156	27.3558	26.1186	25.4676	27.0763
RTN3	Reticulon-3	Q9ES97	-0.5643	26.3647	26.9607	27.3533	26.3121	25.4277	27.0006
CDK1	Cyclin-dependent kinase 1	P11440	-0.405073	26.4809	26.893	27.3491	26.4421	25.7373	27.1298
RPS13	40S ribosomal protein S13	P62301	-0.174945	26.3959	26.5538	27.3487	26.486	25.6523	27.3423
KBTBD8	Kelch repeat and BTB domain-containing protein 8	Q3UQV5	-0.55275	25.9323	26.3178	27.3468	26.0805	24.8806	26.7795
IVD	Isovaleryl-CoA dehydrogenase, mitochondrial	Q9JHI5	-0.894705	26.3685	27.0286	27.3457	26.0893	25.3923	26.5246
HNRNPA2B1	Heterogeneous nuclear ribonucleoproteins A2/B1	O88569	-0.0370093	26.7703	26.2485	26.6413	26.1783	25.4572	27.3349
VAC14	Protein VAC14 homolog	Q80WQ2	-0.476269	26.6145	27.2151	27.333	26.4454	25.4895	27.3315
RPLP0	60S acidic ribosomal protein P0	P14869	-0.400531	26.8992	27.1771	27.3314	26.6812	26.0999	27.2371
BTF3L4	Transcription factor BTF3 homolog 4	Q9CQH7	-2.45945	26.4272	27.2859	27.3265	19.6772	2	25.585
RPL11	60S ribosomal protein L11	Q9CXW4	-0.653463	26.3853	26.6464	27.317	26.393	25.8816	26.2329
TPT1	Translationally-controlled tumor protein	P63028	-1.0329	25.8064	26.7353	27.3151	26.0137	23.6622	26.3216
USP15	Ubiquitin carboxyl-terminal hydrolase 15	Q8R5H1	-0.79535	26.071	26.9039	27.3125	26.1418	24.7637	26.6661
AP1B1	AP-1 complex subunit beta-1	O35643	-0.350063	26.7151	26.7041	27.3086	26.1289	26.0464	27.2529
ARPC2	Actin-related protein 2/3 complex subunit 2	Q9CVB6	-0.611256	26.311	26.4534	27.3046	25.837	24.6394	27.0306
ACTR3	Actin-related protein 3	Q99JY9	-0.470454	26.3121	26.7895	27.2876	26.2185	25.8253	26.8922
FMNL3	Formin-like protein 3	Q6ZPF4	-0.305289	26.0161	26.6327	27.2747	26.1324	25.2495	27.227
DDX3X	ATP-dependent RNA helicase DDX3X	Q62167	-0.87583	26.4284	27.2213	27.2732	26.024	25.3519	26.7365
TCEA3	Transcription elongation factor A protein 3	P23881	-0.289962	2	2	27.0916	26.263	26.6894	27.2729
TM9SF2	Transmembrane 9 superfamily member 2	P58021	-0.882683	26.2154	26.8468	27.2672	25.4788	23.1427	27.0536
CDC42	Cell division control protein 42 homolog	P60766	-0.61983	26.9657	27.263	26.9326	26.3083	25.9695	26.8933
PSMD4	26S proteasome non-ATPase regulatory subunit 4	O35226	-0.226855	25.6217	27.1171	27.256	26.513	25.845	27.1549
UBE2M	NEDD8-conjugating enzyme Ubc12	P61082	-0.77388	26.2673	26.4008	27.2541	25.4969	24.4518	26.8667
NDFIP1	NEDD4 family-interacting protein 1	Q8R0W6	-0.785197	26.1654	27.0094	27.2529	25.3586	25.0154	27.0393
LRPAP1	Alpha-2-macroglobulin receptor-associated protein	P55302	-0.731418	26.6567	26.7976	27.2476	25.9832	25.1808	26.9042
GATD3	Glutamine amidotransferase-like class 1 domain-containing protein 3, mitochondrial	Q9D172	-0.623417	26.539	26.8513	27.2472	26.2811	25.0363	26.9466
CHDH	Choline dehydrogenase, mitochondrial	Q8BJ64	-0.134355	26.293	26.715	27.1468	26.5259	25.7125	27.2448
ACTN1	Alpha-actinin-1	Q7TPR4	-0.237437	26.5175	26.8346	27.0946	26.2995	25.9143	27.242
PRUNE1	Exopolyphosphatase PRUNE1	Q8BIW1	-0.648122	26.5318	26.9459	27.2407	26.0754	25.1936	27.0245
PUF60	Poly(U)-binding-splicing factor PUF60	Q3UEB3	-0.798221	26.661	27.0548	27.2378	26.0679	25.5324	26.7559
GSTT2	Glutathione S-transferase theta-2	Q61133	-0.477774	26.1011	26.8458	27.2377	26.4525	25.8595	26.5642
FKBP4	Peptidyl-prolyl cis-trans isomerase FKBP4	P30416	-0.181902	26.727	26.6571	27.0229	26.5006	25.799	27.2363
GBE1	1,4-alpha-glucan-branching enzyme	Q9D6Y9	-0.30653	26.2867	26.694	27.2316	26.1401	25.705	27.1866
PDHB	Pyruvate dehydrogenase E1 component subunit beta, mitochondrial	Q9D051	-0.516012	26.4532	26.9397	27.2238	26.3131	25.3569	27.0351
PACSIN2	Protein kinase C and casein kinase substrate in neurons protein 2	Q9WVE8	-0.576518	26.2255	26.64	27.2147	26.1838	24.9311	26.826
SURF4	Surfeit locus protein 4	Q64310	-0.735514	26.3861	26.891	27.2119	26.0028	24.9885	26.8415
PLIN3	Perilipin-3	Q9DBG5	-0.479714	25.7514	26.3297	27.2071	26.0602	25.426	26.5322
SARS1	Serine--tRNA ligase, cytoplasmic	P26638	0.204257	25.8427	25.8772	26.3772	25.742	24.8635	27.1994
ADH5	Alcohol dehydrogenase class-3	P28474	-0.309785	26.5228	26.6814	27.0838	26.1707	25.5772	27.1962
DPPA5A	Developmental pluripotency-associated protein 5A	Q9CQS7	-0.605048	25.837	26.4363	27.1896	24.7851	24.2803	27.1648
LANCL1	Glutathione S-transferase LANCL1	O89112	-0.452257	26.5506	27.0113	27.0995	25.9105	25.832	27.1891
UQCRC1	Cytochrome b-c1 complex subunit 1, mitochondrial	Q9CZ13	-0.775016	26.4341	26.7511	27.1867	25.9917	25.15	26.6364
RPS7	40S ribosomal protein S7	P62082	-0.37714	26.5586	26.8589	27.1862	26.5005	26.088	26.8519
PGM1	Phosphoglucomutase-1	Q9D0F9	-1.14154	26.447	27.0633	27.185	25.4287	25.3475	26.3635
HINT1	Adenosine 5'-monophosphoramidase HINT1	P70349	-0.680753	26.7999	26.5499	27.1656	25.7748	25.439	26.8996
RPS11	40S ribosomal protein S11	P62281	-0.729206	25.9561	26.444	27.1563	25.72	25.2599	26.4092
RPL5	60S ribosomal protein L5	P47962	-0.35273	26.1888	25.6885	27.156	26.0316	25.3477	26.6873
CSE1L	Exportin-2	Q9ERK4	-0.0498903	26.2823	26.3566	26.9472	25.9476	26.1241	27.1506
CAPZB	F-actin-capping protein subunit beta	P47757	-0.602599	26.4494	26.8993	27.1492	26.1822	25.4254	26.8336
GLMN	Glomulin	Q8BZM1	-0.839385	26.0277	26.5355	27.1483	25.695	24.3639	26.5728
TMED10	Transmembrane emp24 domain-containing protein 10	Q9D1D4	-0.0968617	25.8691	26.2714	26.8634	25.949	25.0102	27.1472
PAM16	Mitochondrial import inner membrane translocase subunit TIM16	Q9CQV1	-0.601109	26.0128	26.8388	27.1462	25.554	25.0721	27.0311
ESRP1	Epithelial splicing regulatory protein 1	Q3US41	-0.544711	26.4246	26.528	27.1412	26.3648	25.2101	26.6364
ARPC1B	Actin-related protein 2/3 complex subunit 1B	Q9WV32	-0.563405	26.4147	26.808	27.1385	26.2192	25.3297	26.8352
FLNA	Filamin-A	Q8BTM8	-0.341359	26.3029	26.677	27.1269	25.9546	25.8965	27.0423
CAPRIN2	Caprin-2	Q05A80	-0.304435	26.1824	26.6658	26.9777	25.9327	25.4214	27.1205
PDZK1	Na(+)/H(+) exchange regulatory cofactor NHE-RF3	Q9JIL4	-0.126437	26.2914	27.1185	26.6128	26.5581	25.8388	27.1006
PSMC1	26S proteasome regulatory subunit 4	P62192	0.0886111	26.281	25.9714	26.6504	26.0567	25.6777	27.1135
MTHFD1	C-1-tetrahydrofolate synthase, cytoplasmic	Q922D8	-0.796331	26.2979	26.9894	27.111	26.0448	25.3814	26.4976
RPE	Ribulose-phosphate 3-epimerase	Q8VEE0	-0.467796	25.5247	25.4682	27.1104	25.1417	23.3186	26.906
EIF5A	Eukaryotic translation initiation factor 5A-1	P63242	-0.639784	26.3552	26.4681	27.1094	26.0273	24.955	26.6688
IPO5	Importin-5	Q8BKC5	-0.678699	26.404	26.6063	27.1075	25.8319	24.9107	26.8186
ANP32B	Acidic leucine-rich nuclear phosphoprotein 32 family member B	Q9EST5	-0.983653	26.4193	26.2888	27.0996	25.5874	24.8019	26.2517
ECHS1	Enoyl-CoA hydratase, mitochondrial	Q8BH95	-0.339586	25.8737	26.8858	27.0766	26.1112	25.3433	27.0953
GOLM1	Golgi membrane protein 1	Q91XA2	-1.33831	25.5889	25.1818	27.0933	25.345	24.3938	24.6852
HNRNPA3	Heterogeneous nuclear ribonucleoprotein A3	Q8BG05	-0.353595	26.6621	26.6106	26.8657	26.2487	25.1056	27.0932
STX12	Syntaxin-12	Q9ER00	-0.628598	26.0848	26.368	27.0902	26.5205	25.0984	25.8921
BSCL2	Seipin	Q9Z2E9	-0.448631	26.6219	27.0395	26.7953	26.3768	24.9371	27.0896
DTX2	Probable E3 ubiquitin-protein ligase DTX2	Q8R3P2	-0.754061	26.3769	26.5966	27.0872	25.7452	25.2541	26.5771
PFKL	ATP-dependent 6-phosphofructokinase, liver type	P12382	-0.636473	26.2734	26.6145	27.0851	26.1142	25.1872	26.5613
FAM162A	Protein FAM162A	Q9D6U8	-0.531237	26.3423	26.8192	27.0375	25.7226	25.2129	27.0799
KTN1	Kinectin	Q61595	-0.591907	26.3999	26.7904	27.0751	26.0297	25.3881	26.8037
RPL7	60S ribosomal protein L7	P14148	-0.40254	25.4098	26.2028	27.0738	25.5612	25.3988	26.6496
ERP44	Endoplasmic reticulum resident protein 44	Q9D1Q6	-0.119154	25.8266	24.8125	27.0734	25.9031	25.2086	26.7185
ELAVL2	ELAV-like protein 2	Q60899	-0.403669	26.7251	26.7086	26.9523	25.9728	25.7929	27.0704
RRAGB	Ras-related GTP-binding protein B	Q6NTA4	-0.936604	25.5991	25.8413	27.0683	25.3162	24.9422	25.7765
ALDH6A1	Methylmalonate-semialdehyde dehydrogenase [acylating], mitochondrial	Q9EQ20	0.039568	25.743	26.5652	26.9936	26.4033	26.0137	27.0671
RAB3GAP2	Rab3 GTPase-activating protein non-catalytic subunit	Q8BMG7	-0.470973	25.9647	26.3048	27.065	25.9951	25.2183	26.6101
PTBP3	Polypyrimidine tract-binding protein 3	Q8BHD7	-0.819317	26.2831	26.1677	27.0548	25.5323	25.4941	26.1058
DDI2	Protein DDI1 homolog 2	A2ADY9	-0.589235	25.6403	26.8051	27.0545	25.8299	25.1291	26.6999
RPS20	40S ribosomal protein S20	P60867	-0.707362	26.086	27.0503	27.0476	25.7382	25.4265	26.747
ATP6V0D1	V-type proton ATPase subunit d 1	P51863	-0.325649	25.5208	26.4347	26.8794	25.6358	24.1204	27.0498
RPL13	60S ribosomal protein L13	P47963	-0.616373	25.1652	25.1152	27.0493	25.7169	24.2754	25.9177
ATP2C1	Calcium-transporting ATPase type 2C member 1	Q80XR2	-0.115597	25.9377	26.2527	27.0094	26.1397	25.4355	27.0453
AIMP2	Aminoacyl tRNA synthase complex-interacting multifunctional protein 2	Q8R010	-0.608447	25.4166	26.1714	27.044	25.2892	24.8775	26.5445
LRRC59	Leucine-rich repeat-containing protein 59 [Cleaved into: Leucine-rich repeat-containing protein 59, N-terminally processed]	Q922Q8	-0.456637	26.5159	26.3973	26.6867	25.6209	24.5166	27.0342
CHORDC1	Cysteine and histidine-rich domain-containing protein 1	Q9D1P4	-0.337879	26.152	26.4264	26.5995	25.4239	24.7612	27.0333
DNAJB11	DnaJ homolog subfamily B member 11	Q99KV1	-0.251143	26.6237	26.1131	26.4323	25.9877	24.3195	27.0241
ARPC4	Actin-related protein 2/3 complex subunit 4	P59999	-0.246977	26.2649	26.4966	26.9018	25.864	25.7367	27.0233
RTCB	RNA-splicing ligase RtcB homolog	Q99LF4	-0.759507	25.7967	26.1184	27.0138	24.6387	24.1688	26.7456
SLC7A5	Large neutral amino acids transporter small subunit 1	Q9Z127	-0.487375	26.0256	26.9545	27.0125	25.9349	25.6561	26.8509
RANBP1	Ran-specific GTPase-activating protein	P34022	-0.467268	26.5762	26.5703	27.0119	25.7876	25.6353	26.9792
UPF1	Regulator of nonsense transcripts 1	Q9EPU0	-0.425676	26.3182	26.8242	27.0102	26.3547	25.1236	26.9429
EEF2K	Eukaryotic elongation factor 2 kinase	O08796	-0.169327	26.0171	26.5048	26.7813	26.1462	25.1974	27.0072
CLIC4	Chloride intracellular channel protein 4	Q9QYB1	-0.235143	26.3252	26.13	27.0058	26.0992	25.3723	26.9868
RPS9	40S ribosomal protein S9	Q6ZWN5	-0.630092	25.7762	25.8165	27.0042	25.5101	24.2417	26.4963
RAB5C	Ras-related protein Rab-5C	P35278	-0.656396	26.3116	26.641	27.003	25.9871	25.4609	26.4531
ACOT7	Cytosolic acyl coenzyme A thioester hydrolase	Q91V12	-0.966383	26.0354	27.0014	26.6434	25.3556	24.4956	26.4396
PSMB6	Proteasome subunit beta type-6	Q60692	-0.714995	26.2257	26.0859	27.0002	25.0594	25.0931	26.607
WDR82	WD repeat-containing protein 82	Q8BFQ4	-0.236684	25.878	26.4178	26.9967	26.086	25.3684	26.9263
DDX1	ATP-dependent RNA helicase DDX1	Q91VR5	-0.54982	26.1335	26.7089	26.9957	25.7797	24.5836	26.9964
BNIP3L	BCL2/adenovirus E1B 19 kDa protein-interacting protein 3-like	Q9Z2F7	0.18834	23.17	26.8121	26.9961	26.6223	26.0097	26.9165
RELA	Transcription factor p65	Q04207	-3.64734	26.9946	22.6878	2	22.4332	20.8256	23.148
IQGAP1	Ras GTPase-activating-like protein IQGAP1	Q9JKF1	-0.737624	26.2099	26.546	26.9911	25.3078	25.0004	26.7157
RPS19	40S ribosomal protein S19	Q9CZX8	-0.45712	26.062	26.2039	26.9891	25.6992	25.6127	26.5548
SCFD1	Sec1 family domain-containing protein 1	Q8BRF7	-0.328192	26.063	26.3813	26.989	26.0304	25.4	26.8232
USP30	Ubiquitin carboxyl-terminal hydrolase 30	Q3UN04	0.21157	25.9898	25.6782	26.2144	26.9851	25.934	24.9559
ACTR1A	Alpha-centractin	P61164	-0.194387	26.1576	26.2271	26.9843	26.4866	25.4972	26.6959
RHOA	Transforming protein RhoA	Q9QUI0	-0.955604	26.6759	26.9805	26.9016	25.7572	25.1824	26.4771
PSMA7	Proteasome subunit alpha type-7	Q9Z2U0	-0.420781	26.23	26.8508	26.8677	26.047	25.2178	26.9796
SLC3A2	4F2 cell-surface antigen heavy chain	P10852	-0.381518	25.831	26.6162	26.9787	26.0712	25.3556	26.75
CLPB	Caseinolytic peptidase B protein homolog	Q60649	-1.29448	25.9836	26.4061	26.978	24.4819	24.6667	26.0005
ETHE1	Persulfide dioxygenase ETHE1, mitochondrial	Q9DCM0	3.59117	24.3012	21.8525	22.9955	2	2	26.9743
EIF4H	Eukaryotic translation initiation factor 4H	Q9WUK2	-0.572747	25.8028	26.5233	26.9689	26.0827	24.7423	26.4767
RPL27	60S ribosomal protein L27	P61358	-1.00178	2	24.8838	26.9682	25.0072	24.9126	25.745
RAC1	Ras-related C3 botulinum toxin substrate 1	P63001	-0.715584	26.7099	26.9663	26.8731	26.2446	25.4322	26.5278
PSMA1	Proteasome subunit alpha type-1	Q9R1P4	-0.746324	26.3588	26.5468	26.9658	25.7232	24.9222	26.5854
ERP29	Endoplasmic reticulum resident protein 29	P57759	-0.667686	26.2141	26.4539	26.9637	25.8163	24.8898	26.5623
HSPA4L	Heat shock 70 kDa protein 4L	P48722	-0.321054	26.1926	26.4016	26.9613	26.0992	25.4611	26.8249
SKI	Ski oncogene	Q60698	-0.441115	26.2416	26.627	26.87	25.8072	25.1532	26.9438
UBFD1	Ubiquitin domain-containing protein UBFD1	Q78JW9	-0.340476	25.9959	26.6855	26.943	26.2997	25.9391	26.4714
ATP6V1B2	V-type proton ATPase subunit B, brain isoform	P62814	-0.276199	26.9421	26.1191	26.2511	25.8071	25.7464	26.8094
ATP5F1C	ATP synthase subunit gamma, mitochondrial	Q91VR2	-0.177214	26.0797	26.3431	26.75	26.1303	25.0849	26.9404
RPS17	40S ribosomal protein S17	P63276	-0.758446	26.0595	26.9357	26.7966	25.0869	25.2733	26.7121
IDH3G	Isocitrate dehydrogenase [NAD] subunit gamma 1, mitochondrial	P70404	-0.504495	25.7403	26.6033	26.9323	25.9213	24.8379	26.6881
ATP6V1E1	V-type proton ATPase subunit E 1	P50518	-0.469802	26.4176	26.7639	26.9323	26.3971	25.2626	26.7241
ABCD3	ATP-binding cassette sub-family D member 3	P55096	-0.552007	26.0573	26.6331	26.9322	26.1518	24.9542	26.5595
ITSN2	Intersectin-2	Q9Z0R6	-0.382968	26.3014	26.6477	26.9309	26.2699	25.4067	26.799
CD9	CD9 antigen	P40240	-1.25026	26.1773	26.9265	24.8473	25.3573	2	24.4228
RPL28	60S ribosomal protein L28	P41105	-0.54298	25.2651	25.024	26.9246	24.9975	25.0716	26.0559
ABHD12	Lysophosphatidylserine lipase ABHD12	Q99LR1	-0.929698	25.9475	26.5767	26.923	25.5406	24.4584	26.2794
RPL21	60S ribosomal protein L21	O09167	-0.842439	26.0642	25.8262	26.9213	25.8308	24.7448	25.7231
MICU2	Calcium uptake protein 2, mitochondrial	Q8CD10	-0.690601	26.0261	26.5321	26.9194	25.6625	25.0176	26.4866
FSCN1	Fascin	Q61553	-0.513951	26.1445	26.9178	26.6333	26.0096	24.7664	26.8085
CTPS1	CTP synthase 1	P70698	-0.116617	25.3967	26.6392	26.3972	25.8338	24.9363	26.9175
RPS14	40S ribosomal protein S14	P62264	-0.466013	26.5001	25.6636	26.9134	26.0042	25.4201	26.3662
PGM2L1	Glucose 1,6-bisphosphate synthase	Q8CAA7	-0.294312	26.3618	26.5035	26.9091	26.0734	25.734	26.8886
CYCS	Cytochrome c, somatic	P62897	-0.530797	25.9646	26.5644	26.9085	25.3294	25.1931	26.8467
RPL12	60S ribosomal protein L12	P35979	-0.256878	26.3271	26.2788	26.4938	25.6603	25.2194	26.9041
ADRM1	Proteasomal ubiquitin receptor ADRM1	Q9JKV1	-0.320606	25.2798	25.9338	26.9012	25.8713	25.3421	26.2604
USP14	Ubiquitin carboxyl-terminal hydrolase 14	Q9JMA1	-0.553862	25.8904	26.3666	26.9002	25.6328	24.9519	26.606
CMAS	N-acylneuraminate cytidylyltransferase	Q99KK2	-0.539478	26.198	26.5866	26.8959	25.8605	25.5392	26.5542
OAT	Ornithine aminotransferase, mitochondrial	P29758	0.30914	25.6237	25.1244	25.6547	24.8374	24.2666	26.8934
PLXNB2	Plexin-B2	B2RXS4	-0.535587	26.1681	26.6173	26.8882	25.8604	24.9359	26.786
ACTBL2	Beta-actin-like protein 2	Q8BFZ3	-3.03645	26.8843	2	2	2	22.894	24.4171
RPS10	40S ribosomal protein S10	P63325	0.441547	25.0697	25.8517	25.9182	25.8469	24.9369	26.8822
WARS1	Tryptophan--tRNA ligase, cytoplasmic	P32921	-0.29201	25.7787	26.5057	26.8695	26.0903	25.3414	26.7264
TMED9	Transmembrane emp24 domain-containing protein 9	Q99KF1	-0.761633	26.124	26.3596	26.8587	25.7954	24.5365	26.3089
NSFL1C	NSFL1 cofactor p47	Q9CZ44	-0.550308	26.1675	26.3809	26.8543	25.8736	25.5843	26.2926
RDH11	Retinol dehydrogenase 11	Q9QYF1	-0.833185	26.0865	26.5556	26.8507	25.8122	24.6136	26.2297
NADK2	NAD kinase 2, mitochondrial	Q8C5H8	-0.463807	26.1935	26.3004	26.8448	25.7803	25.2158	26.6643
FAHD2	Fumarylacetoacetate hydrolase domain-containing protein 2A	Q3TC72	-0.576695	26.2901	26.7702	26.8434	26.216	25.2111	26.5121
JPT2	Jupiter microtubule associated homolog 2	Q6PGH2	-0.639016	25.4889	25.9786	26.8386	25.2663	24.8758	26.2285
NCL	Nucleolin	P09405	-0.449824	25.5479	25.7298	26.8349	25.6313	24.788	26.3128
ELMOD2	ELMO domain-containing protein 2	Q8BGF6	-0.519554	26.411	26.8322	26.8146	26.217	25.6316	26.5454
FXR1	RNA-binding protein FXR1	Q61584	-0.328398	25.9692	26.278	26.8311	26.1318	25.4	26.4923
NUP37	Nucleoporin Nup37	Q9CWU9	23.6999	2	2	2	26.8281	21.0157	25.3325
CISD1	CDGSH iron-sulfur domain-containing protein 1	Q91WS0	-1.54017	25.6216	26.7757	26.8256	24.3097	24.3298	25.7459
PSMB5	Proteasome subunit beta type-5	O55234	-0.753409	25.9548	26.3177	26.8246	25.5332	24.3607	26.4007
ETFA	Electron transfer flavoprotein subunit alpha, mitochondrial	Q99LC5	-0.368575	26.4107	26.8229	26.6839	26.334	25.64	26.682
RPS26	40S ribosomal protein S26	P62855	0.0210595	25.1333	24.6963	26.8207	25.9303	25.7844	25.9194
RPLP1	60S acidic ribosomal protein P1	P47955	-0.669076	2	24.451	26.8095	2	24.1809	26.0479
H3-5	Histone H3.3C	P02301	0.103305	23.5182	23.6876	26.8052	25.3621	24.3695	26.4005
EPB41L2	Band 4.1-like protein 2	O70318	-0.451262	26.1815	26.5874	26.8042	25.8353	25.4461	26.7069
PSMA5	Proteasome subunit alpha type-5	Q9Z2U1	-0.80808	26.3375	26.568	26.8033	25.5532	25.3377	26.2624
RPS5	40S ribosomal protein S5 [Cleaved into: 40S ribosomal protein S5, N-terminally processed]	P97461	-0.149308	25.3213	26.5145	24.9138	23.7033	24.3912	26.803
VAMP7	Vesicle-associated membrane protein 7	P70280	-0.151978	25.5543	26.1427	26.7843	25.8894	25.3226	26.7251
PPP1R7	Protein phosphatase 1 regulatory subunit 7	Q3UM45	-0.441699	25.1453	25.6776	26.7843	25.363	24.9137	26.2016
TFAM	Transcription factor A, mitochondrial	P40630	-0.177847	25.9213	26.2421	26.5146	25.6582	25.3452	26.7835
TMEM199	Transmembrane protein 199	Q5SYH2	-0.809612	26.0838	26.3315	26.7763	25.0524	24.9601	26.3729
ALDH4A1	Delta-1-pyrroline-5-carboxylate dehydrogenase, mitochondrial	Q8CHT0	-0.512133	26.0649	26.6921	26.7749	26.0044	25.5981	26.3854
TUSC3	Tumor suppressor candidate 3	Q8BTV1	-1.31437	26.0198	26.2147	26.7718	24.8208	24.9203	25.3698
HMGB2	High mobility group protein B2	P30681	-0.353261	25.9368	26.0931	26.7708	25.7368	25.0963	26.6342
CRELD2	Protein disulfide isomerase Creld2	Q9CYA0	-0.205906	25.2064	26.4086	26.7691	25.7999	25.3352	26.7025
CDC37	Hsp90 co-chaperone Cdc37	Q61081	-0.494147	26.1802	26.4505	26.7661	25.8226	25.1948	26.6093
TJP1	Tight junction protein ZO-1	P39447	-0.335213	26.5607	26.3172	26.4618	25.8403	25.3854	26.7656
UBA2	SUMO-activating enzyme subunit 2	Q9Z1F9	-0.987247	25.5293	26.3105	26.7645	24.8423	24.4359	26.0842
SRM	Spermidine synthase	Q64674	-0.310872	25.8226	26.3197	26.7631	25.9342	25.0867	26.6788
AIMP1	Aminoacyl tRNA synthase complex-interacting multifunctional protein 1	P31230	-0.400844	25.9773	26.6075	26.7618	26.1379	25.0351	26.652
RPL8	60S ribosomal protein L8	P62918	-0.300617	26.0016	25.658	26.7586	26.0291	25.1756	26.3126
FXR2	RNA-binding protein FXR2	Q9WVR4	-0.561351	25.7372	26.388	26.7558	25.925	24.6987	26.3113
LRPPRC	Leucine-rich PPR motif-containing protein, mitochondrial	Q6PB66	-1.89198	24.9105	24.2794	26.753	22.8277	23.4063	24.6262
DLGAP4	Disks large-associated protein 4	B1AZP2	-1.05822	25.1598	25.4879	26.7517	24.8425	23.7094	25.6057
CAMK2G	Calcium/calmodulin-dependent protein kinase type II subunit gamma	Q923T9	-0.817865	25.3569	26.1547	26.7512	25.5997	23.9454	25.9277
DEGS1	Sphingolipid delta	O09005	-0.36314	25.5821	26.1341	26.7501	26.3336	25.0133	25.9679
PA2G4	Proliferation-associated protein 2G4	P50580	-0.403005	25.6243	26.4522	26.749	26.1008	25.3404	26.2426
EIF5	Eukaryotic translation initiation factor 5	P59325	-0.577715	25.6424	26.41	26.7458	25.6169	24.7595	26.4295
CHCHD3	MICOS complex subunit Mic19	Q9CRB9	-0.892057	25.8618	25.4045	26.743	25.017	24.7588	25.7122
TMEM14C	Transmembrane protein 14C	Q9CQN6	-0.325914	25.08	25.7749	26.7412	25.4279	25.1563	26.2725
ITGB1	Integrin beta-1	P09055	-0.304546	25.6686	26.0109	26.4492	25.2107	24.3373	26.7401
PSMA6	Proteasome subunit alpha type-6	Q9QUM9	-0.478009	26.0906	26.3194	26.7396	25.8366	24.9818	26.5583
TIMM44	Mitochondrial import inner membrane translocase subunit TIM44	O35857	-0.386583	26.0351	26.3889	26.7386	25.9873	25.2432	26.5642
FIP1L1	Pre-mRNA 3'-end-processing factor FIP1	Q9D824	-0.43424	25.6182	25.7559	26.7367	25.5981	24.6517	26.3521
CRYM	Ketimine reductase mu-crystallin	O54983	0.392236	24.8056	25.0434	26.0859	25.3744	24.3946	26.7363
PSMD3	26S proteasome non-ATPase regulatory subunit 3	P14685	-0.467711	25.9947	26.4371	26.736	25.745	24.9373	26.6663
ARPC3	Actin-related protein 2/3 complex subunit 3	Q9JM76	-0.565956	25.7346	25.9573	26.7317	25.3274	24.7142	26.3808
GLUD1	Glutamate dehydrogenase 1, mitochondrial	P26443	0.118956	26.0893	25.8169	26.571	26.0845	26.0066	26.7314
PPP2R5C	Serine/threonine-protein phosphatase 2A 56 kDa regulatory subunit gamma isoform	Q60996	-0.25065	25.0055	26.1283	26.7314	25.7351	25.136	26.4376
MYO10	Unconventional myosin-X	F8VQB6	-0.554383	25.6537	25.8616	26.731	25.2874	24.1626	26.4797
PGAM1	Phosphoglycerate mutase 1	Q9DBJ1	-0.713791	25.9314	26.4603	26.7302	25.7831	24.9518	26.1213
ATP1B3	Sodium/potassium-transporting ATPase subunit beta-3	P97370	-0.424916	25.0898	25.2861	26.7302	25.8704	23.6078	25.9731
XPO7	Exportin-7	Q9EPK7	-0.551156	26.131	26.5036	26.7294	25.9569	24.7147	26.5515
PSMB1	Proteasome subunit beta type-1	O09061	0.489788	25.5091	24.8604	26.1081	26.0915	24.782	26.7266
CNN3	Calponin-3	Q9DAW9	-0.223123	26.1255	26.0508	26.4197	25.6387	25.0985	26.7261
SLC44A2	Choline transporter-like protein 2	Q8BY89	-0.694768	25.9839	26.4447	26.7213	25.559	25.116	26.2533
NDC1	Nucleoporin NDC1	Q8VCB1	-0.551478	25.6859	25.9139	26.7212	25.7715	24.9033	25.9933
RBBP7	Histone-binding protein RBBP7	Q60973	-0.85565	26.0538	26.3482	26.7203	24.6462	24.7974	26.4455
RPS12	40S ribosomal protein S12	P63323	0.056158	26.0509	2	26.7193	2	2	26.4796
ME2	NAD-dependent malic enzyme, mitochondrial	Q99KE1	-0.273942	25.3652	26.0088	26.7133	25.6634	25.2107	26.4332
ECI1	Enoyl-CoA delta isomerase 1, mitochondrial	P42125	0.0329615	25.9467	25.7186	26.2108	25.1964	25.6776	26.713
GCAT	2-amino-3-ketobutyrate coenzyme A ligase, mitochondrial	O88986	-0.323803	25.8044	26.1292	26.7064	25.7656	25.4407	26.4291
HSPA1B	Heat shock 70 kDa protein 1B	P17879	0.0280566	25.4147	26.3343	26.2822	26.0514	25.1038	26.7062
PC	Pyruvate carboxylase, mitochondrial	Q05920	-0.506476	26.0222	25.8729	26.7005	25.4273	25.2618	26.3005
TXNL1	Thioredoxin-like protein 1	Q8CDN6	-0.31654	25.5945	26.7004	26.2342	25.4097	25.4012	26.6145
GYS1	Glycogen [starch] synthase, muscle	Q9Z1E4	-0.444995	26.3846	26.6137	26.6973	26.1651	25.3762	26.5888
SEPTIN7	Septin-7	O55131	-0.325652	26.3657	26.4175	26.6309	26.0537	25.4288	26.6947
PSMC6	26S proteasome regulatory subunit 10B	P62334	-0.301285	26.0022	26.2419	26.5357	25.7733	24.982	26.6785
USP5	Ubiquitin carboxyl-terminal hydrolase 5	P56399	-0.375228	25.7282	26.2937	26.6773	25.7788	25.0485	26.5277
MYL12B	Myosin regulatory light chain 12B	Q3THE2	-0.53148	26.0798	25.0415	26.6672	24.8837	24.1534	26.5326
FKBP1A	Peptidyl-prolyl cis-trans isomerase FKBP1A	P26883	-0.11999	25.5723	25.4617	26.5556	25.6011	24.3919	26.6633
CSNK2A1	Casein kinase II subunit alpha	Q60737	-0.144261	25.8238	25.4325	25.7804	24.5002	24.0118	26.6625
H2BC7; H2BC11; H2BC13; H2BC15	Histone H2B type 1-F/J/L	P10853	-0.845511	25.46	25.6061	26.661	22.2195	24.2946	26.3861
RPL7A	60S ribosomal protein L7a	P12970	-0.544682	25.0954	25.0645	26.6607	25.3938	24.7026	25.5746
SACM1L	Phosphatidylinositol-3-phosphatase SAC1	Q9EP69	-0.424806	25.9234	26.197	26.6592	25.7963	25.0269	26.4426
PSMC4	26S proteasome regulatory subunit 6B	P54775	-0.232571	25.8056	26.3748	26.1864	25.7985	24.5574	26.6585
NAA16	N-alpha-acetyltransferase 16, NatA auxiliary subunit	Q9DBB4	-0.661423	25.8781	26.3444	26.6519	25.2429	24.8641	26.4119
HAT1	Histone acetyltransferase type B catalytic subunit	Q8BY71	-0.498943	25.6981	26.3365	26.6519	25.4262	24.7205	26.5807
SEC22B	Vesicle-trafficking protein SEC22b	O08547	-0.244873	26.0454	26.385	26.5016	25.7947	25.5537	26.6474
ETFB	Electron transfer flavoprotein subunit beta	Q9DCW4	-0.86306	25.9526	26.1696	26.6457	25.58	24.4861	25.8686
RUVBL1	RuvB-like 1	P60122	-0.344066	25.6775	26.1032	26.6444	25.8479	25.0681	26.3601
CAPZA2	F-actin-capping protein subunit alpha-2	P47754	-0.278512	26.0523	25.7074	26.1536	25.0288	24.5784	26.6431
LPIN2	Phosphatidate phosphatase LPIN2	Q99PI5	-0.267067	26.3958	26.364	26.2925	26.097	25.1457	26.6397
RPS15	40S ribosomal protein S15	P62843	-5.99035	2	22.1629	26.6372	18.0086	20.4695	2
WIPI2	WD repeat domain phosphoinositide-interacting protein 2	Q80W47	-0.515915	25.8289	25.9806	26.6364	25.5143	24.7461	26.3389
ATL3	Atlastin-3	Q91YH5	-0.26285	25.6393	26.4688	26.5146	25.9136	25.0054	26.6317
FAM3C	Protein FAM3C	Q91VU0	-1.05624	26.2356	26.4701	26.6266	25.0044	25.0581	25.9301
COPZ1	Coatomer subunit zeta-1	P61924	-0.491399	25.8334	26.0797	26.6202	25.4425	24.4022	26.5548
RPL4	60S ribosomal protein L4	Q9D8E6	-0.643616	24.8282	25.5181	26.6163	25.0605	24.741	25.6497
ESD	S-formylglutathione hydrolase	Q9R0P3	-0.310166	26.1891	25.9787	26.6156	25.8549	25.4371	26.4529
RPL13A	60S ribosomal protein L13a	P19253	0.117148	25.2582	26.1713	26.2835	26.0755	25.2873	26.6099
ATP5PB	ATP synthase F	Q9CQQ7	-0.414692	25.7834	26.3228	26.6097	25.8039	24.8518	26.4901
IMPDH2	Inosine-5'-monophosphate dehydrogenase 2	P24547	-0.497654	26.0483	26.244	26.6055	25.5908	25.1344	26.4297
GNAI2	Guanine nucleotide-binding protein G	P08752	-0.238171	25.5217	26.6048	26.1222	25.9675	24.8369	26.4817
CYC1	Cytochrome c1, heme protein, mitochondrial	Q9D0M3	-0.74926	25.8563	25.3048	26.6035	24.8433	24.9098	25.8344
SEPTIN6	Septin-6	Q9R1T4	0.0591225	25.6414	2	2	24.3831	25.2469	26.6024
HDLBP	Vigilin	Q8VDJ3	-0.328212	25.8115	26.2047	26.5727	25.7037	24.9109	26.6014
SEPTIN2	Septin-2	P42208	-0.581113	26.3452	26.429	26.5941	25.811	25.062	26.4424
FKBP2	Peptidyl-prolyl cis-trans isomerase FKBP2	P45878	-0.705862	26.2466	26.1797	26.0222	25.0796	19.3721	26.5906
PEX14	Peroxisomal membrane protein PEX14	Q9R0A0	-1.15435	25.1302	24.5704	26.5892	24.1175	23.7766	25.2706
PGAM5	Serine/threonine-protein phosphatase PGAM5, mitochondrial	Q8BX10	-0.600687	25.682	26.5841	26.3512	25.836	25.1405	25.872
TALDO1	Transaldolase	Q93092	-0.2225	25.8577	24.7782	26.5829	25.4937	25.1116	26.2432
RALA	Ras-related protein Ral-A	P63321	-0.561604	25.716	26.3664	26.5797	25.9209	24.4479	26.2077
XPO1	Exportin-1	Q6P5F9	-0.440728	25.9855	26.0121	26.5779	25.8365	24.7023	26.3477
EIF2S2	Eukaryotic translation initiation factor 2 subunit 2	Q99L45	-0.508319	25.4597	26.0297	26.5768	25.5949	24.726	26.1124
RUVBL2	RuvB-like 2	Q9WTM5	-0.45205	25.9346	26.1574	26.5742	25.5599	24.6528	26.5579
ACO2	Aconitate hydratase, mitochondrial	Q99KI0	-0.596121	26.1785	26.5221	26.5693	25.8231	25.3807	26.1948
TIGAR	Fructose-2,6-bisphosphatase TIGAR	Q8BZA9	-0.852902	26.5648	25.1319	25.9135	25.3735	20.5969	25.9596
VPS29	Vacuolar protein sorting-associated protein 29	Q9QZ88	-0.551833	25.6097	25.7979	26.5642	24.77	24.4753	26.431
MYO6	Unconventional myosin-VI	Q64331	-0.462241	25.6223	26.1693	26.5594	25.4851	24.8219	26.3816
SCAMP1	Secretory carrier-associated membrane protein 1	Q8K021	-0.0614016	25.5598	26.0792	26.1765	25.8428	24.7894	26.5586
SEPTIN11	Septin-11	Q8C1B7	-0.109588	25.726	26.2005	26.0421	25.7714	24.8834	26.557
NARS1	Asparagine--tRNA ligase, cytoplasmic	Q8BP47	-0.811441	24.4583	25.956	26.5516	23.662	21.6742	26.4179
RPL31	60S ribosomal protein L31	P62900	-1.60656	2	2	26.5509	25.1708	24.5284	25.0559
RPL24	60S ribosomal protein L24	Q8BP67	-0.337665	25.2654	24.3707	26.5506	25.3447	24.7682	25.7307
RAB4A	Ras-related protein Rab-4A	P56371	-0.867887	26.0997	26.0689	26.5472	25.6125	24.3306	25.8218
LPCAT1	Lysophosphatidylcholine acyltransferase 1	Q3TFD2	-0.513771	25.9492	26.0335	26.5462	25.5627	24.0256	26.5087
STT3B	Dolichyl-diphosphooligosaccharide--protein glycosyltransferase subunit STT3B	Q3TDQ1	-0.789355	25.7495	26.5394	26.4716	25.4569	24.8684	25.981
PSMC5	26S proteasome regulatory subunit 8	P62196	-0.354935	25.6449	25.9615	26.5378	25.2599	25.4449	26.2969
GRHPR	Glyoxylate reductase/hydroxypyruvate reductase	Q91Z53	-0.505481	25.7384	26.0628	26.5371	25.1553	25.5129	26.1047
IARS1	Isoleucine--tRNA ligase, cytoplasmic	Q8BU30	-0.379735	25.6652	25.7054	26.5363	25.3881	24.6761	26.375
ABCF3	ATP-binding cassette sub-family F member 3	Q8K268	-0.858848	25.6169	26.1874	26.5341	25.2057	24.5933	25.8405
UGGT1	UDP-glucose:glycoprotein glucosyltransferase 1	Q6P5E4	-0.375199	25.6555	26.356	26.5337	26.0039	25.2051	26.1777
USP7	Ubiquitin carboxyl-terminal hydrolase 7	Q6A4J8	-0.570168	25.7788	26.0911	26.5336	25.0197	25.1734	26.2624
SAMM50	Sorting and assembly machinery component 50 homolog	Q8BGH2	-0.126601	24.1119	26.396	26.5335	25.9663	24.68	26.4867
PSMD11	26S proteasome non-ATPase regulatory subunit 11	Q8BG32	-0.474532	25.7139	26.1424	26.5228	25.4538	24.8778	26.3498
GMPS	GMP synthase [glutamine-hydrolyzing]	Q3THK7	-0.610369	25.5492	26.4148	26.5143	25.4316	24.4149	26.3566
NLRP9C	NACHT, LRR and PYD domains-containing protein 9C	Q66X01	0.278571	21.8603	2	26.5015	26.1365	26.0145	25.1885
POLE3	DNA polymerase epsilon subunit 3	Q9JKP7	0.0464998	26.1209	26.0009	25.5076	25.0329	2	26.5013
PSMD1	26S proteasome non-ATPase regulatory subunit 1	Q3TXS7	-0.593086	26.4953	26.0934	26.4922	25.5521	25.219	26.3324
PDHA1	Pyruvate dehydrogenase E1 component subunit alpha, somatic form, mitochondrial	P35486	-0.211103	25.4721	25.8972	26.4934	25.4972	25.1481	26.4436
ACBD3	Golgi resident protein GCP60	Q8BMP6	-0.29952	26.2074	26.4906	26.1596	25.8402	25.5996	26.4164
RPL23A	60S ribosomal protein L23a	P62751	-0.342279	24.9551	25.4054	26.4903	25.349	25.0381	25.7866
PSMD6	26S proteasome non-ATPase regulatory subunit 6	Q99JI4	-0.588875	25.4447	25.5692	26.4886	25.3136	24.237	25.9449
RPL23	60S ribosomal protein L23	P62830	-0.363434	25.8229	25.39	25.945	24.1737	24.0703	26.486
SRSF3	Serine/arginine-rich splicing factor 3	P84104	-0.191937	25.8395	25.0373	26.1458	24.8302	24.5277	26.4814
TMEM165	Transmembrane protein 165	P52875	-1.10983	26.0094	25.8598	26.4813	24.3014	24.2133	25.9041
SEC61B	Protein transport protein Sec61 subunit beta	Q9CQS8	-1.00034	25.1855	25.9342	26.4803	24.2891	23.8912	25.8826
KHDC1A	KH homology domain-containing protein 1A	Q3UWR2	-0.676709	25.7367	26.1526	26.4785	25.1043	24.9516	26.0939
RHOT1	Mitochondrial Rho GTPase 1	Q8BG51	-1.13764	25.3276	25.8311	26.4718	25.0276	23.7898	25.2487
MTAP	S-methyl-5'-thioadenosine phosphorylase	Q9CQ65	-1.4981	25.8731	26.0056	26.4673	25.1613	24.6845	23.7353
ARMC1	Armadillo repeat-containing protein 1	Q9D7A8	-0.655692	25.9109	26.0738	26.4626	25.2355	24.7651	26.1712
SCAMP2	Secretory carrier-associated membrane protein 2	Q9ERN0	-0.691932	26.0695	26.4034	26.4591	25.3796	24.7998	26.3028
GLRX3	Glutaredoxin-3	Q9CQM9	-0.644624	25.9902	26.2581	26.4577	25.3734	24.8998	26.2198
NANS	Sialic acid synthase	Q99J77	-0.342937	25.3003	26.0199	26.4542	25.5469	25.0564	26.1565
FSD1	Fibronectin type III and SPRY domain-containing protein 1	Q7TPM6	-0.737595	25.4146	26.1349	26.4536	25.1735	24.4114	25.9755
HNRNPF	Heterogeneous nuclear ribonucleoprotein F	Q9Z2X1	-0.166471	25.6106	25.705	26.1871	25.3137	24.7831	26.4534
WDR5	WD repeat-containing protein 5	P61965	-1.32484	26.1675	26.1309	26.4522	25.2144	22.3207	25.6294
SPRY4	Protein sprouty homolog 4	Q9WTP2	-0.805582	25.1879	25.7528	26.4504	25.4285	23.8162	25.4786
RPL6	60S ribosomal protein L6	P47911	0.194626	24.5134	24.1836	26.4477	25.4699	25.379	25.9281
SEC61A1	Protein transport protein Sec61 subunit alpha isoform 1	P61620	-0.462273	26.1839	26.4469	26.3691	25.8662	25.0947	26.3852
CTPS2	CTP synthase 2	P70303	-0.405152	25.9061	25.8794	26.1823	25.2895	24.2053	26.4433
CPA1	Carboxypeptidase A1	Q7TPZ8	-0.521492	25.7178	26.2214	26.4432	25.3776	24.7558	26.3339
PATL2	Protein PAT1 homolog 2	A2ARM1	-0.532322	25.9757	26.1207	26.4423	25.6495	24.3829	26.3344
PSMD14	26S proteasome non-ATPase regulatory subunit 14	O35593	-0.72423	25.9817	26.3991	26.441	25.4194	23.9397	26.3887
SH3KBP1	SH3 domain-containing kinase-binding protein 1	Q8R550	-0.806605	26.1298	26.4403	25.238	25.5902	24.6227	25.2649
IPO9	Importin-9	Q91YE6	-0.264052	25.6959	26.0549	26.44	25.8808	24.8392	26.3799
PSMC3	26S proteasome regulatory subunit 6A	O88685	-0.335399	25.8331	25.9087	26.4385	25.5842	24.9489	26.3694
RTN4IP1	Reticulon-4-interacting protein 1, mitochondrial	Q924D0	-0.887578	21.2202	2	26.4382	21.7914	2	25.4812
MAPRE2	Microtubule-associated protein RP/EB family member 2	Q8R001	-0.915433	25.8149	26.2431	26.4279	24.8791	24.878	25.8282
ME1	NADP-dependent malic enzyme	P06801	-0.587295	25.1698	25.8712	26.4203	24.4174	24.6948	26.183
SEC23A	Protein transport protein Sec23A	Q01405	-0.550228	26.0651	26.4147	26.4071	25.6106	24.8861	26.3838
ADPGK	ADP-dependent glucokinase	Q8VDL4	-0.669386	25.7696	26.2166	26.4133	25.491	24.7355	25.9782
APCS	Serum amyloid P-component	P12246	-1.14008	26.4069	2	2	24.3371	25.9037	25.1466
DNAJA3	DnaJ homolog subfamily A member 3, mitochondrial	Q99M87	-0.433723	25.1262	25.8192	26.404	25.5731	24.6422	25.8523
KDM2B	Lysine-specific demethylase 2B	Q6P1G2	-1.41962	24.7769	25.2837	26.4018	23.9559	21.2803	25.2657
PFN2	Profilin-2	Q9JJV2	-1.2214	25.5648	25.0277	26.4016	22.6686	22.8022	25.8383
STRN	Striatin	O55106	-0.571517	25.8275	26.1882	26.4002	25.6133	24.8226	26.0631
PSMA2	Proteasome subunit alpha type-2	P49722	-0.37755	25.2779	25.9176	26.2547	24.9054	24.384	26.3978
FABP5	Fatty acid-binding protein 5	Q05816	-1.00657	25.3078	25.5182	26.3941	24.3224	23.3938	25.7513
EIF4E3	Eukaryotic translation initiation factor 4E type 3	Q9DBB5	-1.26741	25.7946	26.3938	26.3125	24.3424	24.6529	25.5097
RPS25	40S ribosomal protein S25	P62852	-0.217656	25.4241	26.1382	26.3936	26.1089	25.087	26.0615
RHOT2	Mitochondrial Rho GTPase 2	Q8JZN7	-0.580734	25.4205	26.0761	26.3935	25.572	24.5601	25.8777
CORO1B	Coronin-1B	Q9WUM3	-0.677148	25.7109	25.8678	26.3929	25.1795	24.3447	26.0284
PPA1	Inorganic pyrophosphatase	Q9D819	-0.340176	25.161	25.4557	26.3632	24.8913	23.8393	26.3917
FERMT2	Fermitin family homolog 2	Q8CIB5	-0.37943	25.2908	25.7929	26.3839	25.1571	24.4421	26.3128
UBE2O	(E3-independent) E2 ubiquitin-conjugating enzyme UBE2O	Q6ZPJ3	-0.761524	25.3077	25.8554	26.3836	25.0404	23.8541	25.8923
CPNE3	Copine-3	Q8BT60	-0.096726	25.0881	25.9269	26.3786	25.4348	25.4542	26.3114
PDCD5	Programmed cell death protein 5	P56812	-1.13828	25.5901	25.6447	26.3752	23.7921	23.9876	25.7172
CAPZA1	F-actin-capping protein subunit alpha-1	P47753	-0.458145	25.741	25.9895	26.3727	25.9252	24.1404	26.0682
PCNA	Proliferating cell nuclear antigen	P17918	-0.243336	25.6418	26.0519	26.2415	25.8232	24.5053	26.3718
CDS1	Phosphatidate cytidylyltransferase 1	P98191	-0.549279	25.473	26.1158	26.3669	25.3484	24.4963	26.1464
RAP1B	Ras-related protein Rap-1b	Q99JI6	-0.0773189	25.4747	25.9963	26.3661	25.6997	25.655	26.2942
PSMB4	Proteasome subunit beta type-4	P99026	-0.772975	25.6546	26.2585	26.3637	25.1206	24.0702	26.1475
EIF3B	Eukaryotic translation initiation factor 3 subunit B	Q8JZQ9	-0.523784	25.7783	25.8527	26.3607	25.0779	24.5315	26.2969
PDXDC1	Pyridoxal-dependent decarboxylase domain-containing protein 1	Q99K01	-0.587015	25.5834	26.0742	26.3598	25.2469	24.8464	26.0159
GSR	Glutathione reductase, mitochondrial	P47791	-0.505114	25.4362	25.7144	26.3554	25.4987	24.4431	25.8636
PARL	Presenilins-associated rhomboid-like protein, mitochondrial	Q5XJY4	0.347002	24.9918	25.8889	24.9886	25.8913	23.9167	26.3533
PIK3R1	Phosphatidylinositol 3-kinase regulatory subunit alpha	P26450	-0.277498	25.6754	26.0889	26.1253	25.487	24.881	26.3505
COPG2	Coatomer subunit gamma-2	Q9QXK3	-0.456197	25.4127	25.9219	26.3504	25.3014	24.7672	26.0886
CDO1	Cysteine dioxygenase type 1	P60334	-0.209174	25.8887	25.2261	26.048	24.1353	25.3864	26.348
IGSF8	Immunoglobulin superfamily member 8	Q8R366	0.344721	24.7686	25.0575	24.7094	23.8873	23.7948	26.3479
MARCKS	Myristoylated alanine-rich C-kinase substrate	P26645	-0.123821	25.2889	25.1228	25.9842	24.7472	24.1429	26.3475
HSPA2	Heat shock-related 70 kDa protein 2	P17156	-0.767491	25.3404	25.9631	26.3471	25.1921	24.3504	25.6813
STX5	Syntaxin-5	Q8K1E0	-0.533129	25.5118	26.1912	26.3439	25.2433	24.6841	26.2206
PDPK1	3-phosphoinositide-dependent protein kinase 1	Q9Z2A0	-0.412198	25.7239	25.8022	26.1673	25.0569	24.4167	26.3401
TPP2	Tripeptidyl-peptidase 2	Q64514	-0.415408	25.5972	26.0084	26.3396	25.3765	25.0616	26.1365
CRIP2	Cysteine-rich protein 2	Q9DCT8	-1.76495	25.108	25.7422	26.3357	24.8811	23.7097	22.8297
HIBADH	3-hydroxyisobutyrate dehydrogenase, mitochondrial	Q99L13	-0.334915	25.5974	26.0696	26.2547	25.6101	24.5074	26.3325
EIF4E	Eukaryotic translation initiation factor 4E	P63073	-0.101816	25.5571	25.9851	26.3323	25.766	2	26.0054
TTC9C	Tetratricopeptide repeat protein 9C	Q810A3	-0.334946	25.2468	25.9036	26.3298	25.3165	24.5801	26.2774
SLC25A1	Tricarboxylate transport protein, mitochondrial	Q8JZU2	0.161565	25.0654	25.7285	25.8713	25.8495	24.5941	26.3294
OOG1	Oogenesin-1	E9Q5G7	0.35075	23.6965	24.563	25.8652	24.9737	23.324	26.3142
RPS6KA1	Ribosomal protein S6 kinase alpha-1	P18653	-2.01146	23.2189	26.3138	23.7446	22.7424	22.7238	23.5929
OSBPL8	Oxysterol-binding protein-related protein 8	B9EJ86	-0.444871	25.4056	26.156	26.3106	25.6366	24.5374	26.1058
KIF1B	Kinesin-like protein KIF1B	Q60575	-0.191991	2	25.1464	26.3041	2	2	25.6464
C4B	Complement C4-B [Cleaved into: Complement C4 beta chain; Complement C4 alpha chain; C4a anaphylatoxin; Complement C4 gamma chain]	P01029	-22.9959	22.2995	26.3035	23.5632	2	2	2
NLN	Neurolysin, mitochondrial	Q91YP2	-0.35609	25.4791	25.9024	26.2992	25.1681	24.923	26.2633
UFD1	Ubiquitin recognition factor in ER-associated degradation protein 1	P70362	0.90198	23.8685	24.47	24.1386	23.9916	22.8111	26.2982
PCCA	Propionyl-CoA carboxylase alpha chain, mitochondrial	Q91ZA3	-0.402168	25.598	26.2083	26.1453	25.4435	24.5878	26.2965
OSBP	Oxysterol-binding protein 1	Q3B7Z2	-0.705352	25.3834	25.8192	26.2909	25.3912	24.4154	25.49
VTN	Vitronectin	P29788	-0.277109	25.7978	26.0315	26.1401	25.4384	25.1902	26.2894
TFRC	Transferrin receptor protein 1	Q62351	-0.0697741	25.2488	25.4494	26.2857	25.6832	24.754	26.2061
PRKCSH	Glucosidase 2 subunit beta	O08795	-0.418856	25.814	25.9975	26.2821	25.6234	24.7424	26.1703
ARL6IP1	ADP-ribosylation factor-like protein 6-interacting protein 1	Q9JKW0	-1.0131	25.4621	26.2733	25.922	25.0913	24.2244	25.2259
NAXE	NAD(P)H-hydrate epimerase	Q8K4Z3	-0.792465	25.5007	26.0365	26.2693	25.184	24.0419	25.801
NPM1	Nucleophosmin	Q61937	0.0381301	25.8402	25.2399	25.7103	25.6505	24.5907	26.2678
MAP2K4	Dual specificity mitogen-activated protein kinase kinase 4	P47809	-0.28121	25.6185	26.2338	26.0183	25.7166	24.7112	26.2653
ATP6V1C1	V-type proton ATPase subunit C 1	Q9Z1G3	-0.41261	25.7031	25.9728	26.2636	25.7569	24.8633	25.9274
EIF3L	Eukaryotic translation initiation factor 3 subunit L	Q8QZY1	-0.535755	25.5177	26.0656	26.2614	25.1441	24.5178	26.1789
VAMP3	Vesicle-associated membrane protein 3	P63024	-0.326597	25.6308	25.7788	26.1219	25.1108	24.7975	26.2567
ATP6V1H	V-type proton ATPase subunit H	Q8BVE3	-0.346115	26.1649	25.8653	25.9525	25.4413	24.9722	26.2514
RELCH	RAB11-binding protein RELCH	Q148V7	-1.03329	25.0136	25.3836	26.2514	24.2124	23.4457	25.4585
TTLL12	Tubulin--tyrosine ligase-like protein 12	Q3UDE2	-0.372314	24.902	26.0227	26.2508	25.2147	24.6995	26.1093
PSMA3	Proteasome subunit alpha type-3	O70435	-0.470968	24.8641	25.864	26.2486	25.3379	24.2922	25.8544
MICU1	Calcium uptake protein 1, mitochondrial	Q8VCX5	-0.717706	25.2017	26.0016	26.2463	25.2992	24.2781	25.6065
PEX11B	Peroxisomal membrane protein 11B	Q9Z210	-0.292506	25.5812	25.406	26.2458	25.4566	24.9276	25.9383
AARSD1	Alanyl-tRNA editing protein Aarsd1	Q3THG9	-0.155282	25.4526	25.298	25.4836	24.3012	24.297	26.2375
KRT14	Keratin, type I cytoskeletal 14	Q61781	1.09299	21.0577	2	25.2383	26.2359	23.2623	2
IGBP1	Immunoglobulin-binding protein 1	Q61249	-0.507614	25.7739	25.9257	26.232	25.3527	24.6105	26.1048
PPP2CB	Serine/threonine-protein phosphatase 2A catalytic subunit beta isoform	P62715	-0.912582	25.5862	26.0008	26.2301	25.0508	22.66	25.9057
PSMD7	26S proteasome non-ATPase regulatory subunit 7	P26516	-0.381637	25.0626	25.9015	26.2219	25.6334	23.8966	26.0066
POLR2G	DNA-directed RNA polymerase II subunit RPB7	P62488	-0.72125	24.695	25.4914	26.2212	24.911	23.5429	25.5395
SUCLA2	Succinate--CoA ligase [ADP-forming] subunit beta, mitochondrial	Q9Z2I9	-1.36034	25.3925	26.2208	26.1949	24.5546	23.4869	25.294
NME1	Nucleoside diphosphate kinase A	P15532	0.31472	25.6884	25.7698	26.2023	2	2	26.2197
LAMP1	Lysosome-associated membrane glycoprotein 1	P11438	-0.975451	25.8632	25.7247	26.2196	25.3928	23.9496	25.2069
TMEM168	Transmembrane protein 168	Q91VX9	-0.320937	25.6659	25.5275	26.2189	25.3755	24.7583	26.1006
DNAJC3	DnaJ homolog subfamily C member 3	Q91YW3	-0.69644	26.111	25.9428	26.2185	25.4963	24.5747	25.8479
RPS15A	40S ribosomal protein S15a	P62245	-0.643144	25.1698	25.6025	26.211	24.655	23.8607	25.9512
GCLM	Glutamate--cysteine ligase regulatory subunit	O09172	-0.228957	25.5459	25.8077	26.209	25.4821	25.0951	26.1679
LETM1	Mitochondrial proton/calcium exchanger protein	Q9Z2I0	-0.326187	25.562	26.1198	26.1106	25.5734	24.7533	26.2032
GSPT1	Eukaryotic peptide chain release factor GTP-binding subunit ERF3A	Q8R050	-0.361346	25.5573	25.9712	26.203	25.3561	24.8965	26.1718
DNAJB6	DnaJ homolog subfamily B member 6	O54946	-0.350253	25.4879	25.8103	25.9749	25.0453	24.461	26.2
AP1M1	AP-1 complex subunit mu-1	P35585	-0.983954	26.1987	25.6485	25.8862	24.9339	24.7446	25.1304
PIN4	Peptidyl-prolyl cis-trans isomerase NIMA-interacting 4	Q9CWW6	-1.29409	26.1091	24.8932	26.1955	24.5969	24.5312	24.513
CKAP5	Cytoskeleton-associated protein 5	A2AGT5	0.0375214	25.1615	25.7137	26.1955	26.0857	25.3294	25.8502
DARS1	Aspartate--tRNA ligase, cytoplasmic	Q922B2	-0.251405	25.4153	24.8524	26.1898	25.4209	24.7232	25.7057
SCP2	Sterol carrier protein 2	P32020	-0.533002	25.441	25.7085	26.0902	24.5065	24.1699	26.1803
TSFM	Elongation factor Ts, mitochondrial	Q9CZR8	-1.09263	24.6793	25.748	26.1796	24.4616	24.2267	24.9281
H1.8	Histone H1.8	Q8VIK3	-1.24139	26.1783	22.638	25.4015	23.8506	21.5712	25.0766
SDHA	Succinate dehydrogenase [ubiquinone] flavoprotein subunit, mitochondrial	Q8K2B3	-0.110682	25.7555	25.8275	26.1737	25.8446	25.4147	26.1161
GNAS	Guanine nucleotide-binding protein G	Q6R0H7	-0.520093	26.1711	25.8327	25.8578	25.242	24.9913	25.9255
ANO10	Anoctamin-10	Q8BH79	-0.336149	24.8642	25.0906	26.1477	24.3191	23.8379	26.1692
NUP93	Nuclear pore complex protein Nup93	Q8BJ71	-0.491091	25.5196	25.8635	26.1669	25.2661	24.6342	25.9511
IGF2R	Cation-independent mannose-6-phosphate receptor	Q07113	-0.693951	20.5583	2	26.1666	24.0927	21.004	25.6119
RPL10	60S ribosomal protein L10	Q6ZWV3	-0.418933	24.711	24.2533	26.1603	25.0255	24.1571	25.2071
DIAPH1	Protein diaphanous homolog 1	O08808	-0.734898	25.3014	25.8287	26.1565	24.9791	24.0278	25.724
RPS8	40S ribosomal protein S8	P62242	-0.490268	25.3978	23.8902	26.1536	25.0757	24.1549	25.3115
ZFPL1	Zinc finger protein-like 1	Q9DB43	0.008999	25.018	25.8932	25.2465	24.843	24.9507	26.1494
TM9SF4	Transmembrane 9 superfamily member 4	Q8BH24	-0.788039	25.3876	25.8321	26.147	25.1357	23.9039	25.5896
LACTB	Serine beta-lactamase-like protein LACTB, mitochondrial	Q9EP89	-0.341186	25.8603	25.704	26.0585	25.5394	24.4969	26.1403
KRT42	Keratin, type I cytoskeletal 42	Q6IFX2	-0.49212	25.2261	2	26.0114	26.14	24.0202	24.4573
UBE2N	Ubiquitin-conjugating enzyme E2 N	P61089	-0.862972	25.99	26.1373	25.9125	25.312	24.9814	25.1476
ARL1	ADP-ribosylation factor-like protein 1	P61211	-0.557492	25.1903	25.599	26.136	24.9368	23.8879	25.9093
OGFR	Opioid growth factor receptor	Q99PG2	-2.19464	24.9064	25.6464	26.1267	21.0338	20.2291	24.8845
AP1M2	AP-1 complex subunit mu-2	Q9WVP1	-0.551044	25.4644	25.4379	26.1215	25.2506	24.6219	25.4773
SDF2L1	Stromal cell-derived factor 2-like protein 1	Q9ESP1	-0.0620417	25.4386	25.6553	26.1204	2	2	25.7047
NAP1L1	Nucleosome assembly protein 1-like 1	P28656	-0.15234	25.3783	25.1853	26.1172	25.0393	2	25.7953
PPP1CA	Serine/threonine-protein phosphatase PP1-alpha catalytic subunit	P62137	-0.636995	25.3515	25.9558	26.1166	24.8666	23.7841	26.084
SDF2	Stromal cell-derived factor 2	Q9DCT5	-1.47872	25.6853	25.1404	26.1123	23.4243	23.8446	24.9468
ETF1	Eukaryotic peptide chain release factor subunit 1	Q8BWY3	-0.544989	25.1745	25.7168	26.1085	25.3598	24.1394	25.6266
TBC1D14	TBC1 domain family member 14	Q8CGA2	-4.05631	2	23.2561	26.1067	21.2377	2	2
NAA50	N-alpha-acetyltransferase 50	Q6PGB6	-0.321497	25.6968	25.6906	25.7076	25.0865	24.4625	26.1008
CA14	Carbonic anhydrase 14	Q9WVT6	-0.496878	25.1491	25.8768	26.0995	25.3988	24.2238	25.7683
RPL3	60S ribosomal protein L3	P27659	-0.906267	24.7924	25.4193	26.0987	24.6137	23.6127	25.2276
NECAP2	Adaptin ear-binding coat-associated protein 2	Q9D1J1	-1.11687	25.339	23.4204	26.0972	24.8638	21.6763	24.5144
IST1	IST1 homolog	Q9CX00	-0.450173	25.8422	26.0965	25.5994	25.1392	24.8237	26.0001
HM13	Minor histocompatibility antigen H13	Q9D8V0	1.0933	25.168	23.0869	24.3462	26.0947	24.848	25.3606
CHCHD6	MICOS complex subunit Mic25	Q91VN4	-0.901863	25.5027	25.7618	26.0939	24.6077	23.8007	25.6877
CTNNB1	Catenin beta-1	Q02248	-0.386302	25.5155	25.6719	25.7557	24.683	24.4336	26.0884
COPS8	COP9 signalosome complex subunit 8	Q8VBV7	-0.118122	25.029	25.7051	25.7543	25.2326	24.4761	26.0881
BAG6	Large proline-rich protein BAG6	Q9Z1R2	-0.341878	25.494	25.6894	26.0732	25.1626	24.676	26.0878
CSAD	Cysteine sulfinic acid decarboxylase	Q9DBE0	0.0476738	24.8598	24.4119	25.7903	24.5929	24.1026	26.0854
MAPK1	Mitogen-activated protein kinase 1	P63085	-0.938804	25.4507	25.6026	26.0817	24.4422	23.9384	25.5368
PRKAR1A	cAMP-dependent protein kinase type I-alpha regulatory subunit [Cleaved into: cAMP-dependent protein kinase type I-alpha regulatory subunit, N-terminally processed]	Q9DBC7	-0.517668	25.4372	25.9129	26.0797	25.2785	24.3791	25.9061
ATP5MG	ATP synthase subunit g, mitochondrial	Q9CPQ8	22.8647	2	2	2	23.5039	23.1189	26.0741
PSMB7	Proteasome subunit beta type-7	P70195	-0.810052	25.1771	25.1235	26.0722	23.3443	24.3769	25.5839
CHMP2A	Charged multivesicular body protein 2a	Q9DB34	-1.05191	25.4013	25.235	26.0716	24.694	23.1299	25.184
KIT	Mast/stem cell growth factor receptor Kit	P05532	-0.423022	25.647	25.5306	26.0698	25.4426	24.4336	25.8292
MTUS1	Microtubule-associated tumor suppressor 1 homolog	Q5HZI1	-0.274032	25.2321	25.6205	26.0668	25.4308	24.5396	25.9263
PTTG1	Securin	Q9CQJ7	-0.449274	25.1398	26.0524	26.0627	25.5453	24.7204	25.6532
RPL22	60S ribosomal protein L22	P67984	0.0846266	25.2276	25.6302	25.5744	25.5265	24.9002	26.0624
LHPP	Phospholysine phosphohistidine inorganic pyrophosphate phosphatase	Q9D7I5	-0.639549	24.6149	24.9627	26.059	25.0455	20.2439	25.4704
NFS1	Cysteine desulfurase, mitochondrial	Q9Z1J3	-0.466237	25.3242	26.0042	26.0577	25.3063	24.7159	25.8537
TBCA	Tubulin-specific chaperone A	P48428	-1.01452	25.0541	24.9285	26.0535	23.3701	23.2082	25.4859
STX17	Syntaxin-17	Q9D0I4	-0.425895	25.0914	25.431	26.0524	25.0236	24.194	25.809
BLMH	Bleomycin hydrolase	Q8R016	-0.511405	24.852	25.635	26.0516	25.4694	23.3061	25.5687
CGN	Cingulin	P59242	-0.441785	25.3923	25.9789	26.0509	25.6097	24.568	25.7445
UBXN4	UBX domain-containing protein 4	Q8VCH8	-0.622774	24.7782	25.994	26.0503	25.3844	23.805	25.5393
MARCKSL1	MARCKS-related protein	P28667	-0.336388	25.7205	25.8892	25.8914	25.4582	24.6743	26.0493
STOML2	Stomatin-like protein 2, mitochondrial	Q99JB2	-0.524854	25.0113	26.0478	25.8198	25.4948	23.8894	25.5772
HOOK1	Protein Hook homolog 1	Q8BIL5	-0.704514	25.5713	25.6935	26.0441	25.2252	24.0703	25.5614
PSMD9	26S proteasome non-ATPase regulatory subunit 9	Q9CR00	-0.00659001	25.1991	25.5472	25.5542	25.6407	23.8093	26.044
ACOT8	Acyl-coenzyme A thioesterase 8	P58137	-0.581451	25.5556	25.688	26.0438	24.9122	24.7471	25.7282
TPMT	Thiopurine S-methyltransferase	O55060	-0.738764	25.555	25.504	26.0418	25.3842	23.7227	25.3176
FBP2	Fructose-1,6-bisphosphatase isozyme 2	P70695	-0.0497455	25.4603	24.5944	26.0407	25.2087	25.1053	25.8598
TBCD	Tubulin-specific chaperone D	Q8BYA0	-0.545938	24.3292	24.5628	26.0377	24.8434	24.1711	24.8191
NIPSNAP1	Protein NipSnap homolog 1	O55125	0.371387	25.1622	25.5057	26.0213	25.9416	26.0368	25.9542
BCAP31	B-cell receptor-associated protein 31	Q61335	-0.484396	25.4774	25.8774	25.7702	24.8468	24.2064	26.0365
RRAGC	Ras-related GTP-binding protein C	Q99K70	-0.597621	25.7121	25.7501	26.0305	25.0922	24.6887	25.7416
IFITM3	Interferon-induced transmembrane protein 3	Q9CQW9	-0.896753	26.0283	25.8918	25.8911	24.4257	24.5163	25.7667
STRA6	Receptor for retinol uptake STRA6	O70491	1.75475	23.699	23.3349	22.1856	23.9808	23.6145	26.0266
PRPF19	Pre-mRNA-processing factor 19	Q99KP6	-0.225946	24.6107	25.2746	26.0231	24.8083	24.4078	25.9152
ESYT1	Extended synaptotagmin-1	Q3U7R1	0.490511	24.496	25.0214	25.0483	25.2108	24.4449	26.0225
TPM3	Tropomyosin alpha-3 chain	P21107	0.288712	25.3198	24.4262	25.4487	24.3726	2	26.0199
DDX39B	Spliceosome RNA helicase Ddx39b	Q9Z1N5	-1.00627	26.0197	24.2996	24.3901	24.0103	23.5347	24.6344
BPNT1	3'(2'),5'-bisphosphate nucleotidase 1	Q9Z0S1	-0.56671	25.5178	25.5743	26.0192	25.0567	24.5873	25.6314
LSM4	U6 snRNA-associated Sm-like protein LSm4	Q9QXA5	-0.0434709	25.7994	25.7406	26.0169	2	2	25.8138
PRKCD	Protein kinase C delta type	P28867	0.13815	24.9597	25.2366	25.4058	25.3031	24.1847	26.0163
ISCA1	Iron-sulfur cluster assembly 1 homolog, mitochondrial	Q9D924	-1.38376	2	25.4018	26.0161	24.0174	23.4665	25.0982
AP2M1	AP-2 complex subunit mu	P84091	-0.372567	25.089	25.6691	25.9979	24.8612	24.4397	26.0042
KPNA7	Importin subunit alpha-8	C0LLJ0	-0.19437	24.8296	25.3035	25.5271	24.6584	23.3892	25.9985
CNOT1	CCR4-NOT transcription complex subunit 1	Q6ZQ08	-0.445756	25.1864	25.5417	25.9969	24.8279	24.4949	25.8297
H1-5	Histone H1.5	P43276	-0.468404	25.5524	25.8523	2	2	23.5676	25.9959
EIF4G2	Eukaryotic translation initiation factor 4 gamma 2	Q62448	-1.16082	24.921	25.6884	25.994	24.2642	23.499	25.1126
CLTA	Clathrin light chain A	O08585	-0.208097	25.0514	25.3655	25.994	25.1294	24.5916	25.9178
VCL	Vinculin	Q64727	-0.734618	24.9434	25.0445	25.9928	23.7705	24.5262	25.3186
MMS19	MMS19 nucleotide excision repair protein homolog	Q9D071	-0.597662	24.591	25.1681	25.9917	24.6933	23.6638	25.4327
ATAD1	Outer mitochondrial transmembrane helix translocase	Q9D5T0	-0.967717	24.8651	25.5456	25.9873	24.3773	23.4473	25.3049
CLYBL	Citramalyl-CoA lyase, mitochondrial	Q8R4N0	-0.786832	24.5773	25.894	25.9818	24.7309	23.5025	25.556
RPS27	40S ribosomal protein S27	Q6ZWU9	0.171398	24.745	25.981	25.868	2	2	25.7996
ABR	Active breakpoint cluster region-related protein	Q5SSL4	-0.281857	24.8724	24.9278	25.9804	24.909	24.2968	25.6826
HNRNPC	Heterogeneous nuclear ribonucleoproteins C1/C2	Q9Z204	1.88503	23.9544	22.5901	23.6305	25.9788	24.7013	25.1764
MAPRE1	Microtubule-associated protein RP/EB family member 1	Q61166	-0.742323	25.7018	25.7341	25.9766	24.9126	24.178	25.7102
EIF4B	Eukaryotic translation initiation factor 4B	Q8BGD9	-0.887546	25.48	25.973	25.7166	25.1666	23.4128	25.3195
LMNB1	Lamin-B1	P14733	-0.229516	25.9688	22.8159	23.2899	25.7687	22.5278	22.9033
ATP6AP2	Renin receptor	Q9CYN9	-0.441847	25.4624	25.7884	25.959	25.3361	24.3061	25.8769
SYNPO	Synaptopodin	Q8CC35	-0.488153	25.209	25.9549	25.3444	24.4935	24.3804	25.8127
RPA1	Replication protein A 70 kDa DNA-binding subunit	Q8VEE4	-0.923058	25.5135	25.9524	25.939	24.6334	24.2012	25.5201
REEP2	Receptor expression-enhancing protein 2	Q8VCD6	-0.697199	24.6858	25.8377	25.9482	25.1525	23.1246	25.4899
ELOC	Elongin-C	P83940	-0.238593	25.4622	25.9334	25.9475	2	2	25.5594
LMAN2	Vesicular integral-membrane protein VIP36	Q9DBH5	-0.434127	24.5436	25.6154	25.947	25.2471	23.9069	25.5307
EIF1A	Eukaryotic translation initiation factor 1A	Q60872	-0.811494	24.3954	25.946	25.7274	24.8849	24.1236	24.9226
EIF5B	Eukaryotic translation initiation factor 5B	Q05D44	-3.95128	21.3449	2	25.9458	21.0528	2	2
RPL38	60S ribosomal protein L38	Q9JJI8	-0.398678	25.4622	25.3731	25.7768	24.5172	24.4712	25.9398
MYO18A	Unconventional myosin-XVIIIa	Q9JMH9	-1.10506	25.5074	25.9385	25.569	25.2234	23.7479	24.3875
RPL26	60S ribosomal protein L26	P61255	-0.422335	24.8352	25.4205	25.9384	24.6349	24.4309	25.7172
MAPK3	Mitogen-activated protein kinase 3	Q63844	-0.584835	25.0359	24.7398	25.9364	24.6487	23.999	25.3018
EIF3I	Eukaryotic translation initiation factor 3 subunit I	Q9QZD9	0.0672398	25.4083	25.4175	24.1961	25.0339	23.8919	25.9277
ASZ1	Ankyrin repeat, SAM and basic leucine zipper domain-containing protein 1	Q8VD46	-0.517826	25.2668	25.9239	25.6118	24.9997	24.4956	25.6115
VPS4A	Vacuolar protein sorting-associated protein 4A	Q8VEJ9	0.141334	24.7274	25.1294	25.5209	25.3248	24.1522	25.9214
PGD	6-phosphogluconate dehydrogenase, decarboxylating	Q9DCD0	-0.442525	25.5049	25.3881	25.9209	25.4018	24.9694	25.1377
DYNLL1	Dynein light chain 1, cytoplasmic	P63168	-0.457305	25.9205	25.3213	24.0776	25.4424	24.6732	24.0472
RBM38	RNA-binding protein 38	Q62176	-0.968491	24.5485	25.2363	25.9167	24.7699	23.8571	24.3448
PSMD8	26S proteasome non-ATPase regulatory subunit 8	Q9CX56	-0.822091	24.0369	25.915	25.3282	24.1066	23.5552	25.2155
EEFSEC	Selenocysteine-specific elongation factor	Q9JHW4	-0.952324	25.1988	25.3744	25.9138	24.6741	23.902	24.9586
TDRD1	Tudor domain-containing protein 1	Q99MV1	-0.0370083	25.4229	25.3244	25.2649	25.3591	24.0892	25.9135
GCN1	eIF-2-alpha kinase activator GCN1	E9PVA8	-2.06006	24.1264	25.8305	25.9085	20.4775	23.1399	24.4615
EIF3E	Eukaryotic translation initiation factor 3 subunit E	P60229	-0.531189	25.0197	24.9983	25.9046	24.4439	24.0659	25.57
NRDC	Nardilysin	Q8BHG1	-0.567978	24.7662	24.9509	25.9008	24.5701	23.7761	25.3946
NGLY1	Peptide-N(4)-(N-acetyl-beta-glucosaminyl)asparagine amidase	Q9JI78	-0.184989	25.1878	25.4272	25.7308	24.8781	24.7811	25.9002
DIPK2A	Divergent protein kinase domain 2A	Q3USZ8	-0.647272	24.561	25.6009	25.8937	24.731	23.9386	25.3968
GK	Glycerol kinase	Q64516	-0.412768	25.746	25.8932	25.7971	25.4685	24.8737	25.7316
EIF4A2	Eukaryotic initiation factor 4A-II	P10630	-0.279695	2	25.4837	25.2372	25.8921	24.791	23.8899
UBE2G1	Ubiquitin-conjugating enzyme E2 G1	P62254	-0.0885322	24.9318	25.658	25.3389	24.0831	2	25.8881
GFPT1	Glutamine--fructose-6-phosphate aminotransferase [isomerizing] 1	P47856	-0.42395	25.1119	25.6409	25.7042	24.7026	24.0511	25.8878
RPS16	40S ribosomal protein S16	P14131	-0.0895383	25.8329	25.1509	25.5473	25.0917	25.2338	25.887
UBE2S	Ubiquitin-conjugating enzyme E2 S	Q921J4	-0.58502	24.2984	24.7698	25.8861	24.9446	2	24.032
MYH10	Myosin-10	Q61879	0.0520826	24.9148	25.0658	24.8218	23.7805	24.4924	25.8843
NDUFA9	NADH dehydrogenase [ubiquinone] 1 alpha subcomplex subunit 9, mitochondrial	Q9DC69	0.0559185	24.537	24.9363	25.5583	24.7913	24.2049	25.878
COBLL1	Cordon-bleu protein-like 1	Q3UMF0	-0.735203	25.1536	25.4668	25.8776	24.863	23.9049	25.2924
SLC25A10	Mitochondrial dicarboxylate carrier	Q9QZD8	0.0481132	24.7419	25.0909	25.0913	24.718	23.7078	25.8769
DCUN1D1	DCN1-like protein 1	Q9QZ73	-0.939659	25.1056	25.1612	25.874	24.7087	23.0688	25.0286
MRPS22	28S ribosomal protein S22, mitochondrial	Q9CXW2	-0.857646	2	2	25.8702	24.8924	24.3153	25.5617
MTCH1	Mitochondrial carrier homolog 1	Q791T5	-0.565298	24.998	24.9116	25.8702	23.8523	24.0593	25.654
SAE1	SUMO-activating enzyme subunit 1	Q9R1T2	-0.587767	25.3285	25.6083	25.8673	25.1686	24.1126	25.4845
NPEPPS	Puromycin-sensitive aminopeptidase	Q11011	-0.275689	25.2379	25.605	25.7867	24.9674	24.7876	25.8598
APOOL	MICOS complex subunit Mic27	Q78IK4	-0.512754	24.767	25.5392	25.8595	24.8093	24.2748	25.491
DYNC1I2	Cytoplasmic dynein 1 intermediate chain 2	O88487	-0.0557097	25.8551	25.058	25.3805	25.6127	24.6666	25.7412
CCDC115	Coiled-coil domain-containing protein 115	Q8VE99	-1.48275	25.2746	25.1258	25.8538	24.3931	22.2819	24.4033
DHFR	Dihydrofolate reductase	P00375	0.0459585	25.2946	25.1212	25.853	25.7614	24.753	25.779
SUPV3L1	ATP-dependent RNA helicase SUPV3L1, mitochondrial	Q80YD1	-0.10871	25.853	25.5846	25.109	2	24.988	25.7816
CUL4A	Cullin-4A	Q3TCH7	-0.51984	24.7263	25.4591	25.8522	24.4664	23.9526	25.6961
HADH	Hydroxyacyl-coenzyme A dehydrogenase, mitochondrial	Q61425	-0.581006	24.1626	25.0486	25.8507	24.3949	23.6421	25.291
BEGAIN	Brain-enriched guanylate kinase-associated protein	Q68EF6	-0.737123	25.2388	25.8502	2	24.8395	2	2
ARHGEF16	Rho guanine nucleotide exchange factor 16	Q3U5C8	-0.585421	25.6109	24.9664	25.8359	24.7108	24.6417	25.3336
PIK3CD	Phosphatidylinositol 4,5-bisphosphate 3-kinase catalytic subunit delta isoform	O35904	-0.125539	25.1765	25.4736	25.3421	25.1343	24.2418	25.8335
CALU	Calumenin	O35887	-0.0509626	25.8264	25.3234	25.2881	25.3849	25.1318	25.7629
DNAJC9	DnaJ homolog subfamily C member 9	Q91WN1	-0.967464	25.1617	25.4006	25.8187	24.1739	24.0942	25.0722
SPAST	Spastin	Q9QYY8	-0.498797	24.1633	24.7093	25.8184	24.4865	24.0379	25.0128
KCMF1	E3 ubiquitin-protein ligase KCMF1	Q80UY2	-0.749497	25.817	23.5728	24.9799	25.1694	22.3245	24.2005
SLC16A1	Monocarboxylate transporter 1	P53986	-0.398122	25.442	25.4151	25.816	25.4866	24.8787	25.0816
SFPQ	Splicing factor, proline- and glutamine-rich	Q8VIJ6	-0.895358	25.5589	25.2104	25.8127	24.2072	22.894	25.6311
PSMD12	26S proteasome non-ATPase regulatory subunit 12	Q9D8W5	-0.636695	25.5321	25.797	25.811	25.1938	24.4209	25.4466
COASY	Bifunctional coenzyme A synthase	Q9DBL7	-0.173944	25.2647	25.2293	25.8079	25.253	24.744	25.7021
BIN2	Bridging integrator 2	D3Z6Q9	-0.658919	24.7681	24.9912	25.8042	24.0083	23.8445	25.4038
OXCT1	Succinyl-CoA:3-ketoacid coenzyme A transferase 1, mitochondrial	Q9D0K2	-0.33848	24.485	25.1454	25.8039	24.6976	24.5763	25.3248
ACAA1A	3-ketoacyl-CoA thiolase A, peroxisomal	Q921H8	-0.614734	25.6385	25.5958	25.8035	25.0424	24.8048	25.3104
NDUFB11	NADH dehydrogenase [ubiquinone] 1 beta subcomplex subunit 11, mitochondrial	O09111	-0.97529	24.9219	25.1406	25.799	23.911	23.5146	25.1378
TENM4	Teneurin-4	Q3UHK6	-0.645708	25.1531	24.4135	25.7985	24.6314	24.2909	24.7856
NUB1	NEDD8 ultimate buster 1	P54729	-1.16929	25.54	25.7684	25.7968	24.0867	24.1774	25.1109
HTRA1	Serine protease HTRA1	Q9R118	-0.310056	25.5101	24.9964	25.0214	24.6901	22.8682	25.7967
EIF3C	Eukaryotic translation initiation factor 3 subunit C	Q8R1B4	-0.298154	25.1833	25.6436	25.7366	25.1794	24.4439	25.7963
SEL1L	Protein sel-1 homolog 1	Q9Z2G6	-0.500261	24.831	25.4149	25.5368	23.1957	24.2262	25.7873
AP2A1	AP-2 complex subunit alpha-1	P17426	-0.551507	25.4737	25.7506	25.6786	24.8316	24.2012	25.7849
UGP2	UTP--glucose-1-phosphate uridylyltransferase	Q91ZJ5	-1.19805	25.0964	25.7839	25.6955	24.4729	23.694	24.7206
RMDN3	Regulator of microtubule dynamics protein 3	Q3UJU9	-0.529643	24.9976	25.2391	25.7836	25.0322	23.7077	25.3456
SLC25A35	Solute carrier family 25 member 35	Q5SWT3	-0.497474	24.7315	25.616	25.7753	25.0643	24.1607	25.3578
RNF170	E3 ubiquitin-protein ligase RNF170	Q8CBG9	-0.608359	25.456	25.6732	25.7718	24.8028	24.0023	25.7593
SNX3	Sorting nexin-3	O70492	-0.306825	24.8848	25.107	25.5389	24.0292	24.2057	25.7695
PLPP3	Phospholipid phosphatase 3	Q99JY8	-1.46793	2	25.6319	25.7659	22.5124	22.0314	25.5423
HNRNPH1	Heterogeneous nuclear ribonucleoprotein H	O35737	-0.826272	25.2879	25.7653	25.5481	24.0409	23.818	25.6009
WASL	Actin nucleation-promoting factor WASL	Q91YD9	-0.648565	24.9715	25.2739	25.7649	24.2527	24.0901	25.4359
WNK2	Serine/threonine-protein kinase WNK2	Q3UH66	-0.118151	25.3734	24.6379	25.7631	25.1507	24.6522	25.6584
TBCB	Tubulin-folding cofactor B	Q9D1E6	-1.18356	25.6792	25.3346	25.7625	23.8236	23.4291	25.2963
PLD3	5'-3' exonuclease PLD3	O35405	-1.44528	25.3667	25.1414	25.7623	24.3136	22.8186	24.3995
LBR	Delta(14)-sterol reductase LBR	Q3U9G9	-1.29429	24.7365	24.914	25.7552	23.4729	23.8425	24.3028
ADAM10	Disintegrin and metalloproteinase domain-containing protein 10	O35598	0.67511	23.8757	24.284	25.0601	25.0938	24.2967	25.7552
HACD3	Very-long-chain (3R)-3-hydroxyacyl-CoA dehydratase 3	Q8K2C9	-0.454342	25.3702	25.6093	25.7463	24.9728	24.2919	25.755
ATP5IF1	ATPase inhibitor, mitochondrial	O35143	0.193064	24.9223	24.7408	23.5911	22.7159	24.2067	25.7541
ARMC10	Armadillo repeat-containing protein 10	Q9D0L7	-0.920286	24.2544	24.4364	25.7509	24.1265	23.3959	24.4587
RAB38	Ras-related protein Rab-38	Q8QZZ8	0.712727	22.9353	23.8608	24.8081	25.7495	23.4822	24.1115
SNX18	Sorting nexin-18	Q91ZR2	-0.375822	25.0638	24.8745	25.533	24.192	23.609	25.7439
AARS1	Alanine--tRNA ligase, cytoplasmic	Q8BGQ7	-0.293088	25.1319	25.5254	25.7418	24.8557	24.9724	25.6303
RPL29	60S ribosomal protein L29	P47915	-1.82418	2	2	25.7399	24.3076	23.376	2
PRKAR2A	cAMP-dependent protein kinase type II-alpha regulatory subunit	P12367	-0.569853	25.1937	24.7485	25.7335	24.5938	23.6227	25.3973
RRM2B	Ribonucleoside-diphosphate reductase subunit M2 B	Q6PEE3	-0.54378	24.8772	25.3717	25.7328	24.5332	24.1111	25.4792
NOPCHAP1	NOP protein chaperone 1	Q9CX66	-0.639106	24.7838	25.3039	25.7312	24.6958	22.8317	25.4636
NRBP1	Nuclear receptor-binding protein	Q99J45	-0.547487	24.9591	25.3164	25.7297	24.8432	23.6586	25.4436
PCMT1	Protein-L-isoaspartate	P23506	0.586512	24.7224	24.8967	25.158	25.2827	2	25.7296
ELOB	Elongin-B	P62869	-0.272671	24.5198	24.9025	25.7247	23.8829	2	25.4461
SYVN1	E3 ubiquitin-protein ligase synoviolin	Q9DBY1	-0.452721	22.382	25.4575	25.7245	24.5787	22.6592	25.4704
ACADSB	Short/branched chain specific acyl-CoA dehydrogenase, mitochondrial	Q9DBL1	-0.664833	25.7011	25.7199	25.6065	25.239	23.809	25.4921
NUDT14	Uridine diphosphate glucose pyrophosphatase NUDT14	Q9D142	-0.853906	24.5903	25.7192	24.2856	24.6115	23.4144	24.1825
RPL18A	60S ribosomal protein L18a	P62717	-0.850379	2	24.0155	25.7111	24.9034	23.4715	24.0016
UBE2Z	Ubiquitin-conjugating enzyme E2 Z	Q3UE37	-0.242003	24.6742	25.0066	25.706	24.7471	24.5996	25.3858
AIP	AH receptor-interacting protein	O08915	-0.549534	24.742	25.17	25.7017	24.6938	23.6569	25.32
HMGB1	High mobility group protein B1	P63158	0.1943	25.3513	24.1935	24.8416	24.6962	24.4963	25.6993
SLC12A7	Solute carrier family 12 member 7	Q9WVL3	-0.849467	24.0424	25.2981	25.6971	23.981	21.9224	25.3288
PDK1	[Pyruvate dehydrogenase	Q8BFP9	-4.08432	25.2091	25.6942	2	21.3876	2	2
MCM6	DNA replication licensing factor MCM6	P97311	1.39134	22.7679	23.1828	24.08	24.7617	22.8552	25.6918
EIF6	Eukaryotic translation initiation factor 6	O55135	-0.747047	25.0029	25.1479	25.6911	24.5547	23.2989	25.2353
TMED2	Transmembrane emp24 domain-containing protein 2	Q9R0Q3	-0.905122	25.6849	25.0984	25.3249	25.3461	23.3205	24.0444
RPS6KA3	Ribosomal protein S6 kinase alpha-3	P18654	-1.30138	24.6554	24.3179	25.6848	23.4069	22.5651	24.5023
MLYCD	Malonyl-CoA decarboxylase, mitochondrial	Q99J39	-0.505893	24.3003	25.1816	25.683	24.4168	23.8531	25.3148
PCYOX1	Prenylcysteine oxidase 1	Q9CQF9	-1.54442	24.5368	25.6401	25.6786	23.3073	22.0604	24.8351
NPLOC4	Nuclear protein localization protein 4 homolog	P60670	-0.581366	24.1848	24.944	25.6764	24.2379	22.7215	25.3731
SYNGR3	Synaptogyrin-3	Q8R191	-0.760704	24.7371	25.4519	25.6752	24.4317	24.1629	25.0108
KBTBD12	Kelch repeat and BTB domain-containing protein 12	Q9D618	-0.895045	24.4097	2	25.6676	24.2765	2	2
ALB	Albumin	P07724	-0.0270574	24.3482	25.5565	25.4878	25.6672	23.7592	25.5192
REEP5	Receptor expression-enhancing protein 5	Q60870	-0.761184	24.978	25.5822	25.6663	24.9235	24.4709	24.6031
LAMB1	Laminin subunit beta-1	P02469	-1.16701	23.8551	25.6661	25.3432	24.3576	23.0374	24.2036
SAR1A	GTP-binding protein SAR1a	P36536	-0.0355664	24.7477	25.1345	25.447	25.1179	24.1359	25.665
PSPC1	Paraspeckle component 1	Q8R326	-0.540931	25.664	19.9645	2	2	24.9349	22.3025
EIF2B1	Translation initiation factor eIF-2B subunit alpha	Q99LC8	-1.00368	24.2845	25.0203	25.6592	24.5515	23.4373	24.0726
AP3B1	AP-3 complex subunit beta-1	Q9Z1T1	-1.74604	25.0724	25.4199	25.6589	21.7061	23.4381	24.5702
HSD17B12	Very-long-chain 3-oxoacyl-CoA reductase	O70503	-0.198592	24.5226	25.0891	25.3876	24.5218	23.6834	25.654
RAB6A	Ras-related protein Rab-6A	P35279	-0.879907	24.5514	25.2236	25.6539	24.0387	23.4834	25.035
PPM1F	Protein phosphatase 1F	Q8CGA0	-0.794878	24.035	24.5137	25.65	24.0995	24.5886	23.3722
RAB5B	Ras-related protein Rab-5B	P61021	-1.14038	24.9969	24.206	25.648	24.3589	24.1435	22.8898
TM9SF3	Transmembrane 9 superfamily member 3	Q9ET30	-0.931927	24.3444	23.5825	25.6471	23.8869	21.588	24.6665
SLC12A9	Solute carrier family 12 member 9	Q99MR3	-0.348913	24.5839	25.2423	25.6453	24.9105	24.0692	25.3571
NDUFV1	NADH dehydrogenase [ubiquinone] flavoprotein 1, mitochondrial	Q91YT0	-0.714141	25.06	25.2113	25.6451	24.6565	23.1383	25.3
PLS3	Plastin-3	Q99K51	-0.573403	24.8679	24.0258	25.6407	22.5665	24.4296	25.1947
AAAS	Aladin	P58742	-0.593244	25.0995	25.4623	25.6399	24.923	23.4984	25.4384
GNB4	Guanine nucleotide-binding protein subunit beta-4	P29387	-1.12075	24.0824	24.2108	25.6396	23.4872	20.0313	24.7546
PDK3	[Pyruvate dehydrogenase	Q922H2	-0.74111	24.7178	25.4033	25.6367	24.2709	23.4648	25.3392
NHE-RF1	Na(+)/H(+) exchange regulatory cofactor NHE-RF1	P70441	0.738688	24.4762	23.9375	24.3394	25.6295	2	23.8893
TSN	Translin	Q62348	-0.559395	23.964	24.8866	25.6293	24.4205	23.5155	24.9727
EHD4	EH domain-containing protein 4	Q9EQP2	-0.768462	25.3645	25.1066	25.6205	24.3813	23.8276	25.2575
SART3	Squamous cell carcinoma antigen recognized by T-cells 3	Q9JLI8	-0.116394	24.1918	25.2383	25.5332	24.86	24.0205	25.6185
ATP2B1	Plasma membrane calcium-transporting ATPase 1	G5E829	-0.0847433	24.4874	24.8109	25.412	24.3305	24.214	25.6173
SEC31A	Protein transport protein Sec31A	Q3UPL0	-0.673705	25.1472	25.586	25.6129	24.6678	23.8001	25.4482
VAMP8	Vesicle-associated membrane protein 8	O70404	-0.578278	24.8236	24.929	25.5324	23.4705	23.3839	25.6101
PAK1	Serine/threonine-protein kinase PAK 1	O88643	-0.283727	25.0868	24.9579	25.4442	24.5153	24.1482	25.6032
KYAT3	Kynurenine--oxoglutarate transaminase 3	Q71RI9	-1.21774	25.6031	24.6456	23.5079	22.9364	23.1165	24.338
RRAS2	Ras-related protein R-Ras2	P62071	-0.726686	24.9482	25.2681	25.6022	24.497	23.5726	25.2024
DLGAP5	Disks large-associated protein 5	Q8K4R9	-0.0581096	24.6385	24.5711	25.4839	25.0654	22.9829	25.5955
CELF1	CUGBP Elav-like family member 1	P28659	-0.504154	25.4151	24.7432	25.5928	24.2848	24.0883	25.539
RPL32	60S ribosomal protein L32	P62911	-1.25518	2	2	25.5924	23.7449	23.1624	25.2584
MEA1	Male-enhanced antigen 1	Q64327	-0.789665	24.3706	2	25.5917	23.6756	2	24.7595
PAFAH1B3	Platelet-activating factor acetylhydrolase IB subunit alpha1	Q61205	-0.362137	25.5826	25.3993	25.578	25.4808	23.8503	25.5911
ATP6V0A1	V-type proton ATPase 116 kDa subunit a 1	Q9Z1G4	-1.41628	23.8091	25.5898	24.5975	22.7598	22.5554	24.3013
MLEC	Malectin	Q6ZQI3	-0.866857	25.3518	25.5869	25.4098	24.7387	23.6633	25.0308
PIK3R4	Phosphoinositide 3-kinase regulatory subunit 4	Q8VD65	-0.463561	24.6823	25.5857	25.5763	24.6512	24.0239	25.5439
NT5C2	Cytosolic purine 5'-nucleotidase	Q3V1L4	-0.863166	24.6342	24.2865	25.5782	23.9749	23.2186	24.6786
PTPN18	Tyrosine-protein phosphatase non-receptor type 18	Q61152	-0.363707	24.9165	25.0335	25.5163	24.1636	24.2386	25.5758
KNTC1	Kinetochore-associated protein 1	Q8C3Y4	0.0172233	24.5804	25.5749	24.3746	24.8695	25.0278	24.9813
NUDT7	Peroxisomal coenzyme A diphosphatase NUDT7	Q99P30	-0.168101	24.4492	24.7371	25.5739	2	2	24.8341
ATG12	Ubiquitin-like protein ATG12	Q9CQY1	0.190966	25.0099	25.3273	24.9163	24.9282	2	25.5731
PFAS	Phosphoribosylformylglycinamidine synthase	Q5SUR0	-0.817088	24.0832	24.6954	25.5725	2	23.1544	24.6622
MFN1	Mitofusin-1	Q811U4	0.206126	24.2405	25.5104	24.7407	25.4407	23.8298	25.5723
EIF4A3	Eukaryotic initiation factor 4A-III	Q91VC3	0.156241	24.6157	25.2047	24.9657	25.4143	23.7027	25.5721
EIF3G	Eukaryotic translation initiation factor 3 subunit G	Q9Z1D1	-0.383256	23.3554	25.0605	25.0346	23.1928	20.8972	25.5716
CHMP5	Charged multivesicular body protein 5	Q9D7S9	-0.414477	24.5981	25.4405	25.3384	24.2632	23.8449	25.571
PPP5C	Serine/threonine-protein phosphatase 5	Q60676	0.0168632	24.7028	25.2409	25.5699	24.6393	25.4061	25.5029
UCHL3	Ubiquitin carboxyl-terminal hydrolase isozyme L3	Q9JKB1	-0.73788	25.3421	24.9809	25.5678	24.4223	23.8635	25.1579
PGP	Glycerol-3-phosphate phosphatase	Q8CHP8	-0.836862	25.281	25.5664	25.3382	24.1608	23.6334	25.3452
OSTF1	Osteoclast-stimulating factor 1	Q62422	-0.707958	25.2176	24.8996	25.5639	24.2883	24.0256	25.0953
RPL30	60S ribosomal protein L30	P62889	-0.2497	24.9659	24.8517	25.5622	24.5303	24.6797	25.3776
ETFDH	Electron transfer flavoprotein-ubiquinone oxidoreductase, mitochondrial	Q921G7	-2.15541	22.3526	22.7069	25.5617	21.9125	21.8177	22.5667
PPP4R1	Serine/threonine-protein phosphatase 4 regulatory subunit 1	Q8K2V1	-0.964112	24.8005	24.8149	25.5615	23.8267	22.9457	24.9554
PPME1	Protein phosphatase methylesterase 1	Q8BVQ5	-0.628668	25.2376	25.1574	25.5601	24.5248	23.7536	25.3747
KIF2A	Kinesin-like protein KIF2A	P28740	-0.311408	24.9799	24.9241	25.5588	24.5786	24.1337	25.5372
ACAA1B	3-ketoacyl-CoA thiolase B, peroxisomal	Q8VCH0	-0.799275	22.7791	25.3288	25.5586	24.1855	22.3899	24.9395
HOXB1	Homeobox protein Hox-B1	P17919	-0.573459	24.8688	24.761	25.5581	2	23.7826	25.0261
CORO7	Coronin-7	Q9D2V7	-1.49239	22.1395	24.0654	25.5544	23.5737	22.83	22.3792
PDLIM2	PDZ and LIM domain protein 2	Q8R1G6	-0.766125	24.8495	25.142	25.5542	24.482	23.7419	24.8883
RPLP2	60S acidic ribosomal protein P2	P99027	-0.868124	23.9271	24.5061	25.5528	22.457	2	24.673
PPP1CB	Serine/threonine-protein phosphatase PP1-beta catalytic subunit	P62141	-0.366101	25.1613	23.4654	25.5511	24.1537	23.4827	25.4508
TPD52	Tumor protein D52	Q62393	-0.458638	24.0168	23.625	25.55	23.932	23.3692	24.8705
RPS18	40S ribosomal protein S18	P62270	-0.895656	24.6569	2	25.3668	25.5489	21.9658	21.5299
RPS6	40S ribosomal protein S6	P62754	-0.811146	24.7249	24.6088	25.5483	23.8494	23.313	24.9679
STRAP	Serine-threonine kinase receptor-associated protein	Q9Z1Z2	-0.0695427	24.0437	25.1738	25.1199	24.5321	23.7404	25.5469
SNX12	Sorting nexin-12	O70493	-0.72874	25.0918	25.3149	25.5469	24.4278	23.4456	25.3359
HNRNPD	Heterogeneous nuclear ribonucleoprotein D0	Q60668	-0.16033	24.6372	24.5575	25.5463	2	24.3279	25.1972
NONO	Non-POU domain-containing octamer-binding protein	Q99K48	-1.31136	24.8712	24.9249	25.5457	22.4948	22.372	25.0019
TIMM50	Mitochondrial import inner membrane translocase subunit TIM50	Q9D880	0.0686117	25.3423	24.2074	24.7888	25.0236	23.5525	25.5436
RBMX	RNA-binding motif protein, X chromosome	Q9WV02	-1.35751	23.8349	24.6755	25.5417	23.9242	21.7223	23.9297
SEC13	Protein SEC13 homolog	Q9D1M0	-0.754308	24.4555	24.7519	25.5403	24.0319	22.4576	25.1175
MINDY3	Ubiquitin carboxyl-terminal hydrolase MINDY-3	Q9CV28	-0.450908	25.038	25.203	25.5336	24.7688	24.3135	25.2375
SLC7A1	High affinity cationic amino acid transporter 1	Q09143	-0.122868	24.7807	24.7762	24.2565	24.1076	22.1382	25.5335
SERBP1	Plasminogen activator inhibitor 1 RNA-binding protein	Q9CY58	-0.645676	25.0812	25.5282	25.4459	24.7052	23.5387	25.3678
COPE	Coatomer subunit epsilon	O89079	-0.407158	24.5999	25.5261	25.3468	25.1153	24.2996	24.8763
BCAP29	B-cell receptor-associated protein 29	Q61334	-0.364003	24.9669	25.3684	25.5224	24.8064	24.1845	25.5219
SMC4	Structural maintenance of chromosomes protein 4	Q8CG47	-0.257449	24.6265	25.1373	25.5209	24.5288	24.3401	25.4976
ARPC5L	Actin-related protein 2/3 complex subunit 5-like protein	Q9D898	-0.234179	23.6074	24.9214	24.9617	23.0572	23.0978	25.5152
PFDN2	Prefoldin subunit 2	O70591	-0.8527	24.2817	23.9055	25.5113	24.3722	23.1442	2
PGM2	Phosphopentomutase	Q7TSV4	-0.218254	25.127	25.1955	25.5069	25.1495	24.7023	25.2891
MINK1	Misshapen-like kinase 1	Q9JM52	0.0548563	24.721	24.3437	24.6289	23.9296	23.7525	25.5069
PITHD1	PITH domain-containing protein 1	Q8BWR2	-0.35002	22.5588	24.6035	25.5065	24.3338	23.3613	24.8539
LMNA	Prelamin-A/C [Cleaved into: Lamin-A/C]	P48678	-0.484049	25.0581	25.1403	25.5053	24.8591	23.7266	25.2946
TMEM41B	Transmembrane protein 41B	Q8K1A5	-0.773082	23.8184	23.5119	25.4993	23.277	2	24.1623
SMS	Spermine synthase	P97355	-0.4393	24.8043	25.2787	25.4966	24.4237	24.4434	25.2969
PTGR1	Prostaglandin reductase 1	Q91YR9	-0.322029	24.3459	24.4739	25.4942	24.8175	22.9433	25.0964
RPL17	60S ribosomal protein L17	Q9CPR4	-0.430714	24.4375	23.1947	25.4828	23.9362	23.1174	25.0027
MT-CO3	Cytochrome c oxidase subunit 3	P00416	-1.04067	24.9425	25.3099	25.4827	23.922	22.9809	25.0406
UBAP2	Ubiquitin-associated protein 2	Q91VX2	-0.15792	24.7373	25.1284	25.3689	24.8339	24.2551	25.4818
CTNNA1	Catenin alpha-1	P26231	-0.4736	25.4384	25.2935	25.3891	24.7934	24.1179	25.4777
RRM1	Ribonucleoside-diphosphate reductase large subunit	P07742	-1.07156	24.6184	25.3079	25.4737	24.1531	22.5462	24.8097
PPID	Peptidyl-prolyl cis-trans isomerase D	Q9CR16	-0.628671	24.7585	25.2083	25.472	24.6336	23.1588	25.1847
CCDC6	Coiled-coil domain-containing protein 6	D3YZP9	-0.90693	24.7672	24.8978	25.4708	24.4281	23.4013	24.4581
ARL3	ADP-ribosylation factor-like protein 3	Q9WUL7	-1.00022	24.5905	24.6554	25.4703	23.5986	23.1782	24.6804
SUCLG1	Succinate--CoA ligase [ADP/GDP-forming] subunit alpha, mitochondrial	Q9WUM5	0.386158	24.0424	24.8875	24.8708	25.0552	24.3845	25.47
GPX3	Glutathione peroxidase 3	P46412	-0.191311	24.4969	24.2483	24.4858	23.3217	20.8602	25.4669
HSPE1	10 kDa heat shock protein, mitochondrial	Q64433	-0.258604	24.6554	24.7557	25.4645	24.9833	23.1704	25.3191
HMOX2	Heme oxygenase 2	O70252	-0.774161	25.3083	24.9726	25.46	24.0362	23.8919	25.1705
TPRG1L	Tumor protein p63-regulated gene 1-like protein	Q9DBS2	-0.979184	23.6	24.2623	25.4589	24.1587	22.5907	23.8392
TFB1M	Dimethyladenosine transferase 1, mitochondrial	Q8JZM0	-0.593974	24.939	25.3214	25.453	24.4642	23.6269	25.3718
EIF3H	Eukaryotic translation initiation factor 3 subunit H	Q91WK2	-0.261314	24.9022	24.8221	25.0988	24.5085	23.4162	25.4498
TJP2	Tight junction protein ZO-2	Q9Z0U1	-0.954046	24.7846	24.5415	25.4497	23.9018	23.5296	24.4797
PAICS	Bifunctional phosphoribosylaminoimidazole carboxylase/phosphoribosylaminoimidazole succinocarboxamide synthetase	Q9DCL9	-0.322153	24.7211	25.4452	25.1135	24.1513	24.6381	25.3564
RPL19	60S ribosomal protein L19	P84099	-0.0650127	22.97	23.2266	25.4368	24.9761	22.1842	24.4479
SLC25A20	Mitochondrial carnitine/acylcarnitine carrier protein	Q9Z2Z6	0.845233	24.3948	22.9295	24.3792	2	24.0086	25.4312
ALDH16A1	Aldehyde dehydrogenase family 16 member A1	Q571I9	-0.468446	25.371	24.718	25.4308	24.8727	24.037	25.1041
ERO1B	ERO1-like protein beta	Q8R2E9	-0.753511	24.4312	24.8244	25.4292	23.8432	23.4537	24.8997
FBXO7	F-box only protein 7	Q3U7U3	-0.579133	23.0804	23.3529	25.4245	22.836	22.3746	24.8541
DNM2	Dynamin-2	P39054	-0.42362	24.6834	25.1618	25.4237	24.7575	23.9187	25.1569
LMAN1	Protein ERGIC-53	Q9D0F3	-0.501682	24.9267	24.2445	25.4236	24.0261	23.0011	25.3535
HDAC6	Histone deacetylase 6	Q9Z2V5	-0.171823	25.0891	25.4233	24.6721	24.5746	24.7015	25.3608
ACAT2	Acetyl-CoA acetyltransferase, cytosolic	Q8CAY6	-1.1897	23.7141	2	25.4228	24.0041	21.9204	24.0882
BSG	Basigin	P18572	0.351545	21.8118	24.4096	25.422	24.7234	25.0133	24.7858
TDRKH	Tudor and KH domain-containing protein	Q80VL1	-0.573649	25.0881	24.843	25.3045	24.1978	22.911	25.4202
XRCC5	X-ray repair cross-complementing protein 5	P27641	-1.04226	24.9113	24.9203	25.4199	23.987	23.0261	24.7059
FIS1	Mitochondrial fission 1 protein	Q9CQ92	-0.525157	24.0493	25.2188	24.9689	23.4026	22.5324	25.419
CSRP1	Cysteine and glycine-rich protein 1	P97315	-0.264252	24.0975	25.4132	25.3258	24.8617	23.9347	25.2766
SLC16A3	Monocarboxylate transporter 4	P57787	-1.33362	2	25.4122	25.2214	24.5436	23.0662	2
HAUS8	HAUS augmin-like complex subunit 8	Q99L00	-1.18304	23.6065	24.4841	25.4099	23.0618	22.5061	24.3157
AGFG1	Arf-GAP domain and FG repeat-containing protein 1	Q8K2K6	0.0423686	24.4364	24.4434	24.9301	24.0853	24.0555	25.4092
HNRNPK	Heterogeneous nuclear ribonucleoprotein K	P61979	-0.752289	24.6089	24.721	25.404	23.775	23.3176	24.9828
RAP2B	Ras-related protein Rap-2b	P61226	-0.370036	24.8846	24.8238	24.8427	23.5461	23.7014	25.4021
RAB18	Ras-related protein Rab-18	P35293	0.239637	23.9805	24.3396	24.8753	22.7763	24.8178	25.3971
CNOT2	CCR4-NOT transcription complex subunit 2	Q8C5L3	-0.0205697	24.2206	24.1461	24.89	23.9338	22.9363	25.3967
IARS2	Isoleucine--tRNA ligase, mitochondrial	Q8BIJ6	0.127738	24.561	24.7987	24.7251	24.454	24.4057	25.3918
TLN1	Talin-1	P26039	2.06844	22.3433	21.3276	23.3022	24.5708	22.922	25.3869
FUBP1	Far upstream element-binding protein 1	Q91WJ8	-0.609277	24.1152	23.765	25.3829	23.4762	23.0658	24.8137
SYNCRIP	Heterogeneous nuclear ribonucleoprotein Q	Q7TMK9	-0.701066	25.3817	24.898	25.3622	24.5696	24.0068	24.8809
TARDBP	TAR DNA-binding protein 43	Q921F2	-0.333585	24.4513	25.3493	24.7071	23.139	24.3184	25.3812
ITGB5	Integrin beta-5	O70309	0.63322	24.4147	22.8909	24.2775	23.6053	24.3865	25.3778
HECTD1	E3 ubiquitin-protein ligase HECTD1	Q69ZR2	-0.251284	24.0381	24.0774	25.3775	24.2163	23.5785	25.0169
RPS23	40S ribosomal protein S23	P62267	-0.286537	24.6071	23.9729	25.3767	24.72	24.0541	24.582
ITGB3	Integrin beta-3	O54890	-23.014	25.3751	24.5311	2	2	2	2
ACSL4	Long-chain-fatty-acid--CoA ligase 4	Q9QUJ7	0.169756	24.231	24.4465	24.3858	24.2912	23.0203	25.3741
NUDT9	ADP-ribose pyrophosphatase, mitochondrial	Q8BVU5	-0.463346	24.411	24.9003	25.3738	24.111	24.0951	25.0354
PDXP	Chronophin	P60487	-0.509445	24.9632	24.6023	25.3706	24.3403	23.4325	25.2091
WASF2	Actin-binding protein WASF2	Q8BH43	0.701741	23.8293	23.8505	23.7444	23.7781	23.7391	25.3684
LMF2	Lipase maturation factor 2	Q8C3X8	-0.949156	24.5198	25.1176	25.3656	23.3837	23.3725	24.9271
PIGS	GPI transamidase component PIG-S	Q6PD26	-0.253306	24.6505	24.9123	25.362	24.957	23.7813	25.1711
WDR37	WD repeat-containing protein 37	Q8CBE3	-0.618322	24.5096	24.9438	25.3591	24.1598	23.5881	24.9875
CLPTM1	Putative lipid scramblase CLPTM1	Q8VBZ3	-0.895786	24.3834	25.2705	25.3582	24.0844	23.3329	24.7531
GDI1	Rab GDP dissociation inhibitor alpha	P50396	-0.264448	25.0014	24.3489	25.3581	24.4152	24.0264	25.3272
NAALAD2	N-acetylated-alpha-linked acidic dipeptidase 2	Q9CZR2	-0.199164	24.6738	24.8884	25.2585	24.7046	23.8425	25.3559
USP47	Ubiquitin carboxyl-terminal hydrolase 47	Q8BY87	-0.0946212	24.2097	24.8359	25.0771	25.3552	23.3311	24.6259
MTX1	Metaxin-1	P47802	-0.506827	24.3188	25.2023	25.2749	24.1683	23.084	25.3486
SNRPD3	Small nuclear ribonucleoprotein Sm D3	P62320	0.257642	24.1825	24.6524	25.348	2	2	25.0656
TMEM135	Transmembrane protein 135	Q9CYV5	23.0086	2	2	2	25.236	24.1903	25.3446
NAA30	N-alpha-acetyltransferase 30	Q8CES0	-0.294444	24.8749	25.0499	25.1689	24.4242	24.1898	25.3416
MAT2A	S-adenosylmethionine synthase isoform type-2	Q3THS6	-0.0918934	24.6472	24.4865	24.681	23.8781	23.748	25.3389
FBL	rRNA 2'-O-methyltransferase fibrillarin	P35550	1.56335	23.2776	2	2	25.3362	23.3282	25.1513
PDHX	Pyruvate dehydrogenase protein X component, mitochondrial	Q8BKZ9	-0.587512	24.0095	24.6175	25.3318	24.2491	23.3911	24.6058
HNRNPL	Heterogeneous nuclear ribonucleoprotein L	Q8R081	0.41033	24.6787	23.1406	24.4423	24.2073	23.9916	25.3317
PAIP1	Polyadenylate-binding protein-interacting protein 1	Q8VE62	-0.480162	24.1444	24.3318	25.3309	23.6918	2	24.6083
CSRP2	Cysteine and glycine-rich protein 2	P97314	-0.924236	24.553	24.1083	25.3291	24.5383	21.1675	24.101
POR	NADPH--cytochrome P450 reductase	P37040	-0.280469	25.1056	25.329	24.9955	25.0078	24.0859	25.2687
TRA2B	Transformer-2 protein homolog beta	P62996	-0.789875	25.0875	24.8954	25.326	23.9194	23.3438	25.1209
CUL2	Cullin-2	Q9D4H8	-0.584987	24.9211	25.1726	25.3249	24.718	23.3123	25.1173
TSG101	Tumor susceptibility gene 101 protein	Q61187	-0.859645	23.8812	24.2614	25.318	23.2571	23.3366	24.3931
TULP3	Tubby-related protein 3	O88413	-1.09809	24.3278	24.5591	25.3147	23.8075	22.4563	24.285
BUB3	Mitotic checkpoint protein BUB3	Q9WVA3	-0.80396	24.6308	25.0344	25.3102	24.1238	23.2738	24.8369
SSB	Lupus La protein homolog	P32067	-0.88629	23.7639	23.059	25.3059	23.9095	22.3752	23.7053
TM7SF3	Transmembrane 7 superfamily member 3	Q9CRG1	-0.482231	22.5503	24.1398	25.3035	2	2	23.9095
ABHD3	Phospholipase ABHD3	Q91ZH7	-0.500283	23.5162	22.9262	25.3019	2	22.6627	24.4084
CAST	Calpastatin	P51125	-0.069305	24.1634	24.7141	25.0226	24.2456	23.8756	25.3012
PISD	Phosphatidylserine decarboxylase proenzyme, mitochondrial	Q8BSF4	-0.728858	24.2601	25.2952	25.1689	24.8569	23.0072	24.3177
H2A1	Histone H2A type 1	P22752	-0.622599	2	23.4215	25.2929	23.7609	22.383	24.9002
SAMHD1	Deoxynucleoside triphosphate triphosphohydrolase SAMHD1	Q60710	-0.89482	23.6505	24.0156	25.2921	23.6464	21.7962	24.3596
UGDH	UDP-glucose 6-dehydrogenase	O70475	-1.51513	20.6091	21.3042	25.2903	2	21.8602	22.6845
NIF3L1	NIF3-like protein 1	Q9EQ80	-0.191416	24.4759	24.7828	24.6968	23.9925	23.5011	25.2879
NDUFA10	NADH dehydrogenase [ubiquinone] 1 alpha subcomplex subunit 10, mitochondrial	Q99LC3	-0.666742	23.4361	24.3812	25.2867	21.1804	23.3673	24.9977
SPTAN1	Spectrin alpha chain, non-erythrocytic 1	P16546	-1.778	23.7016	25.2866	23.5413	21.054	20.8864	23.8724
SFR1	Swi5-dependent recombination DNA repair protein 1 homolog	Q8BP27	-0.919316	25.0846	25.2856	25.2837	24.4686	23.9371	24.44
SDHB	Succinate dehydrogenase [ubiquinone] iron-sulfur subunit, mitochondrial	Q9CQA3	-0.612536	24.6787	25.2214	25.285	24.3975	24.2906	24.7009
MS4A1	B-lymphocyte antigen CD20	P19437	-0.853061	2	25.281	24.7563	24.1466	24.0014	24.3926
HDHD2	Haloacid dehalogenase-like hydrolase domain-containing protein 2	Q3UGR5	-0.911158	24.0547	24.6479	25.2806	23.8262	22.855	24.4208
SF3A1	Splicing factor 3A subunit 1	Q8K4Z5	2.98833	2	22.2954	22.2881	25.2801	2	2
GRAMD1C	Protein Aster-C	Q8CI52	-0.800887	2	24.9895	25.2789	2	2	24.3405
NDUFB4	NADH dehydrogenase [ubiquinone] 1 beta subcomplex subunit 4	Q9CQC7	-0.0572831	23.8601	24.5502	25.0877	2	22.8732	25.2771
CAPN1	Calpain-1 catalytic subunit	O35350	-0.486243	24.6941	24.5738	25.2726	24.1152	23.5524	25.0881
CLINT1	Clathrin interactor 1	Q99KN9	-0.490729	21.7652	24.5911	25.2707	22.4743	23.0467	25.0542
DHODH	Dihydroorotate dehydrogenase	O35435	0.0170024	24.0753	24.587	25.0495	24.747	23.2374	25.2706
HIP1R	Huntingtin-interacting protein 1-related protein	Q9JKY5	-0.673646	23.7493	25.192	25.2682	23.7393	24.0105	24.7025
TYMS	Thymidylate synthase	P07607	-0.612025	25.2639	25.1907	24.9653	24.0156	24.3094	25.0649
EIF2B2	Translation initiation factor eIF-2B subunit beta	Q99LD9	-1.07576	24.1276	24.7405	25.2635	23.6858	21.6424	24.5366
PLK1	Serine/threonine-protein kinase PLK1	Q07832	-1.15424	23.9177	24.6375	25.2608	23.6827	22.0434	24.1887
FAM83G	Protein FAM83G	Q5SWY7	-0.582301	24.5857	24.3886	25.2582	23.9956	22.6252	25.0647
UQCRB	Cytochrome b-c1 complex subunit 7	Q9D855	-1.28872	24.5274	23.9203	25.2569	2	21.9323	24.0909
YTHDF2	YTH domain-containing family protein 2	Q91YT7	-0.268844	24.5177	24.4547	25.2546	23.9565	24.0443	25.2045
GLO1	Lactoylglutathione lyase	Q9CPU0	-0.655091	24.1215	24.4529	25.2536	2	22.824	24.6843
RAB22A	Ras-related protein Rab-22A	P35285	-0.333245	23.6812	25.2444	25.2489	24.9262	22.1599	25.153
GCC2	GRIP and coiled-coil domain-containing protein 2	Q8CHG3	-0.558486	23.9407	24.4868	25.2487	23.8998	22.7915	24.8884
UBXN1	UBX domain-containing protein 1	Q922Y1	-0.335994	24.7737	24.4908	24.5434	23.9637	22.1215	25.248
ASPM	Abnormal spindle-like microcephaly-associated protein homolog	Q8CJ27	-0.605467	24.6536	24.9228	25.2467	23.9853	23.5302	25.0892
OLA1	Obg-like ATPase 1	Q9CZ30	-0.370401	24.8105	24.4778	25.2427	24.0324	24.8595	24.5133
CHMP2B	Charged multivesicular body protein 2b	Q8BJF9	-1.06883	24.5407	24.8823	25.2406	23.5417	23.5208	24.3259
RABGGTA	Geranylgeranyl transferase type-2 subunit alpha	Q9JHK4	-0.309544	24.3026	24.7209	25.24	24.3633	23.3386	25.2094
WBP2	WW domain-binding protein 2	P97765	-0.515165	24.2874	24.8221	25.2384	24.5588	23.6629	24.5628
GFUS	GDP-L-fucose synthase	P23591	-0.417381	24.5952	24.1127	25.2305	24.3214	23.9421	24.573
NDUFA4	Cytochrome c oxidase subunit NDUFA4	Q62425	0.228614	24.7776	25.0835	25.1204	2	2	25.2304
SORBS1	Sorbin and SH3 domain-containing protein 1	Q62417	-0.732847	24.8708	24.8441	25.2297	22.8471	24.0374	25.0811
SSRP1	FACT complex subunit SSRP1	Q08943	-0.648022	24.6007	24.9143	25.227	23.9063	23.146	25.1202
FAT3	Protocadherin Fat 3	Q8BNA6	-1.57701	24.2431	25.1368	25.2266	2	20.5578	24.247
CNOT3	CCR4-NOT transcription complex subunit 3	Q8K0V4	0.834669	24.1104	22.5841	23.7722	24.6151	22.0128	25.222
SCAMP3	Secretory carrier-associated membrane protein 3	O35609	-0.328678	23.6485	25.1505	25.0407	23.9409	23.5638	25.2209
SRSF1	Serine/arginine-rich splicing factor 1	Q6PDM2	-0.679983	24.6255	25	25.2205	23.7074	23.6691	25.0387
CUL3	Cullin-3	Q9JLV5	-0.326554	24.9194	24.8126	24.9412	24.1783	23.9866	25.2127
KARS1	Lysine--tRNA ligase	Q99MN1	-0.912624	24.7241	25.2061	24.9215	24.3404	23.2125	24.3378
LANCL2	LanC-like protein 2	Q9JJK2	-0.495236	22.5533	25.2047	24.9711	23.6265	24.1995	24.45
CARS1	Cysteine--tRNA ligase, cytoplasmic	Q9ER72	-0.203538	24.9128	25.2035	24.896	24.5338	24.66	25.1526
SMAP1	Stromal membrane-associated protein 1	Q91VZ6	-0.589429	2	2	25.2019	24.5763	23.9505	25.0904
PITPNA	Phosphatidylinositol transfer protein alpha isoform	P53810	-0.636571	24.9633	25.2002	24.5699	24.3784	24.0528	24.4328
MFF	Mitochondrial fission factor	Q6PCP5	-0.289159	24.6316	24.8098	25.1995	23.9741	2	25.0514
ATP6V1G1	V-type proton ATPase subunit G 1	Q9CR51	-0.144054	24.1197	24.6649	25.1943	23.7606	2	25.1013
DNAJC11	DnaJ homolog subfamily C member 11	Q5U458	-0.602358	24.2247	24.8784	25.1922	24.5177	23.6295	24.3566
KDM1B	Lysine-specific histone demethylase 1B	Q8CIG3	-0.532537	23.5132	24.4725	25.188	23.8942	23.6032	24.421
GET4	Golgi to ER traffic protein 4 homolog	Q9D1H7	-1.1587	2	23.9917	25.1877	24.688	21.9707	22.4543
KIF23	Kinesin-like protein KIF23	E9Q5G3	-0.276404	24.5175	25.1856	24.7199	24.6111	23.8207	25.0067
ITPR1	Inositol 1,4,5-trisphosphate receptor type 1	P11881	-0.880387	23.2402	24.6076	25.1852	23.3817	21.8446	24.5925
ALG13	Putative bifunctional UDP-N-acetylglucosamine transferase and deubiquitinase ALG13	Q9D8C3	0.0873298	24.3055	24.2982	24.3304	24.0487	23.3819	25.1822
NCK1	Cytoplasmic protein NCK1	Q99M51	-0.86705	24.8365	25.1802	24.7722	23.8685	22.6311	24.8936
MTX2	Metaxin-2	O88441	0.51449	22.8549	25.1797	22.4836	24.0541	2	24.9127
SLC38A5	Sodium-coupled neutral amino acid transporter 5	Q3U1J0	0.249218	24.2427	24.6656	24.3523	24.4982	24.1782	25.1796
PI4K2A	Phosphatidylinositol 4-kinase type 2-alpha	Q2TBE6	-0.641032	24.2828	24.5527	25.1761	23.6452	23.4914	24.7526
CBR1	Carbonyl reductase [NADPH] 1	P48758	0.518194	24.7629	24.156	24.4799	25.1747	24.8873	24.9384
PICALM	Phosphatidylinositol-binding clathrin assembly protein	Q7M6Y3	-0.511144	24.7821	25.02	25.1746	24.3248	23.5828	25.1454
NAXD	ATP-dependent	Q9CZ42	-0.360569	24.4989	23.4448	25.1744	23.2906	2	24.7203
PSMB3	Proteasome subunit beta type-3	Q9R1P1	0.00331936	24.0319	24.2988	25.1092	25.1741	22.8561	24.7746
ECHDC3	Enoyl-CoA hydratase domain-containing protein 3, mitochondrial	Q9D7J9	-0.0409566	24.7212	24.4996	25.1679	24.946	24.2835	25.0122
NUCB1	Nucleobindin-1	Q02819	-0.987617	23.9752	23.9084	25.1677	23.2489	23.0395	23.9912
AP2S1	AP-2 complex subunit sigma	P62743	-0.525285	2	2	25.0553	23.3641	2	25.1663
PRKAA1	5'-AMP-activated protein kinase catalytic subunit alpha-1	Q5EG47	-1.11224	23.6386	24.5472	25.1656	23.4826	22.0321	24.1628
ABHD16A	Phosphatidylserine lipase ABHD16A	Q9Z1Q2	-1.51184	24.0327	24.4365	25.1648	23.8271	23.0552	21.7685
SH3GLB2	Endophilin-B2	Q8R3V5	-0.66318	24.3462	24.7155	25.158	24.0675	23.2687	24.6768
ITGA6	Integrin alpha-6	Q61739	-0.162996	24.4449	24.3399	24.4689	22.9529	23.7988	25.1562
TSNAX	Translin-associated protein X	Q9QZE7	-0.686759	24.0971	23.8694	25.1546	23.8089	22.8758	24.3566
OCIAD1	OCIA domain-containing protein 1	Q9CRD0	-0.32959	24.5181	25.0223	24.9837	24.2985	23.8061	25.154
CSDE1	Cold shock domain-containing protein E1	Q91W50	-0.360294	25.1539	24.8039	24.839	24.4216	24.0599	25.0739
PSMB2	Proteasome subunit beta type-2	Q9R1P3	-0.876643	24.2384	24.8988	25.152	24.257	22.5171	24.3956
AMDHD2	N-acetylglucosamine-6-phosphate deacetylase	Q8JZV7	-0.789665	24.2566	24.4682	25.1517	23.8035	22.6012	24.6085
ARF6	ADP-ribosylation factor 6	P62331	0.134851	24.7405	24.3926	23.105	23.7956	23.6378	25.1508
MCM5	DNA replication licensing factor MCM5	P49718	0.22713	23.7392	24.4501	24.8486	24.5926	23.9372	25.1496
NUP133	Nuclear pore complex protein Nup133	Q8R0G9	-0.763192	23.4447	23.6376	25.1458	23.5513	22.1697	24.2004
HNRNPM	Heterogeneous nuclear ribonucleoprotein M	Q9D0E1	-0.231517	24.9356	23.6196	25.1454	24.0251	24.5376	24.7642
CBX1	Chromobox protein homolog 1	P83917	-0.983012	23.6149	23.5741	25.1432	23.223	22.2505	24.0006
KIAA2013	Uncharacterized protein KIAA2013	Q91X21	-0.390475	24.3905	24.7796	25.1419	24.4084	22.959	25.1242
VBP1	Prefoldin subunit 3	P61759	-0.534527	24.6004	24.4194	25.1408	24.6812	24.0414	23.7821
AP2B1	AP-2 complex subunit beta	Q9DBG3	0.183356	24.1766	24.6503	24.9373	24.4447	24.7436	25.1406
AP1S1	AP-1 complex subunit sigma-1A	P61967	-3.32611	25.1393	2	22.3959	2	2	21.014
LAMTOR1	Ragulator complex protein LAMTOR1	Q9CQ22	-0.47756	24.7424	25.0194	25.1385	24.2942	24.0852	24.9645
CLCC1	Chloride channel CLIC-like protein 1	Q99LI2	-0.860674	24.258	25.1311	25.138	24.3081	20.4821	24.8084
GNA11	Guanine nucleotide-binding protein subunit alpha-11	P21278	0.474545	23.4912	23.9373	24.7917	24.342	24.3196	25.1354
HSD17B7	3-keto-steroid reductase/17-beta-hydroxysteroid dehydrogenase 7	O88736	-0.395935	25.0108	25.131	25.0303	24.8018	24.0611	24.972
SET	Protein SET	Q9EQU5	22.279	2	2	2	23.5498	23.5224	25.1309
NDUFS1	NADH-ubiquinone oxidoreductase 75 kDa subunit, mitochondrial	Q91VD9	-0.117685	24.6796	24.4537	24.7166	24.0593	24.0324	25.1299
GOLGA2	Golgin subfamily A member 2	Q921M4	-0.258375	24.1116	24.868	25.0587	24.2415	23.6791	25.1295
RTN4	Reticulon-4	Q99P72	-0.0857568	23.8542	24.3053	25.0096	24.1449	23.3113	25.129
CC2D1B	Coiled-coil and C2 domain-containing protein 1B	Q8BRN9	-0.418181	24.4027	24.6312	25.129	24.279	23.3089	24.9653
CYRIB	CYFIP-related Rac1 interactor B	Q921M7	1.35451	21.9995	22.8407	24.1195	22.6018	24.9998	25.1262
MPST	3-mercaptopyruvate sulfurtransferase	Q99J99	-1.0479	22.5395	24.4131	25.1261	23.7328	22.7317	23.3321
CYTH2	Cytohesin-2	P63034	-0.682549	23.4937	24.5146	25.1244	23.7239	23.3755	24.2782
EIF3D	Eukaryotic translation initiation factor 3 subunit D	O70194	0.0978503	23.7915	24.5015	24.5427	24.0682	23.632	25.1223
CLTB	Clathrin light chain B	Q6IRU5	-1.27322	25.1185	24.9018	24.4892	23.4952	22.2279	24.3272
PIGK	GPI-anchor transamidase	Q9CXY9	-0.433093	23.7701	25.0754	25.116	24.6259	23.4454	24.6541
DHRS1	Dehydrogenase/reductase SDR family member 1	Q99L04	1.85104	2	23.2746	21.8062	23.6889	2	25.114
ARIH1	E3 ubiquitin-protein ligase ARIH1	Q9Z1K5	-0.873425	24.1389	24.6853	25.1127	23.6414	23.3762	24.299
DYNC1LI1	Cytoplasmic dynein 1 light intermediate chain 1	Q8R1Q8	-0.0416498	24.163	24.2737	24.9316	24.2219	23.6546	25.1123
EIF3F	Eukaryotic translation initiation factor 3 subunit F	Q9DCH4	-0.103923	24.2754	24.1467	24.8161	23.979	23.3886	25.1073
UBQLN1	Ubiquilin-1	Q8R317	0.0959404	20.52	22.0815	25.1067	2	20.4963	24.7643
ACADS	Short-chain specific acyl-CoA dehydrogenase, mitochondrial	Q07417	-0.918207	24.2426	24.6922	25.1064	24.0232	23.0377	24.1256
AGPS	Alkyldihydroxyacetonephosphate synthase, peroxisomal	Q8C0I1	-1.2257	23.6139	23.7818	25.1016	23.3704	23.0303	22.8652
GFER	FAD-linked sulfhydryl oxidase ALR	P56213	-0.0288754	24.0185	24.3699	24.6384	24.0975	23.1964	25.0992
FKBP3	Peptidyl-prolyl cis-trans isomerase FKBP3	Q62446	-1.10288	24.3167	24.9962	25.0987	22.4536	23.3705	24.6012
UQCC1	Ubiquinol-cytochrome-c reductase complex assembly factor 1	Q9CWU6	-0.716138	2	24.1655	25.0985	24.3229	23.3807	24.1076
UBE2L3	Ubiquitin-conjugating enzyme E2 L3	P68037	0.0303636	22.965	24.969	24.1913	23.6718	23.5395	25.0978
ENTPD2	Ectonucleoside triphosphate diphosphohydrolase 2	O55026	-0.717236	24.0561	24.3451	25.0968	23.8546	23.3983	24.1926
GPAA1	Glycosylphosphatidylinositol anchor attachment 1 protein	Q9WTK3	-0.798244	23.5522	23.8872	25.0927	23.8827	23.1022	23.5284
NDRG4	Protein NDRG4	Q8BTG7	-0.525973	24.8237	24.741	24.8832	24.5205	20.7664	25.0909
MAPK8	Mitogen-activated protein kinase 8	Q91Y86	0.457781	22.3864	22.2182	25.0895	23.4286	24.1804	24.9743
PGLS	6-phosphogluconolactonase	Q9CQ60	-1.44997	23.1748	24.4942	25.0872	23.2788	22.9625	22.6997
PPOX	Protoporphyrinogen oxidase	P51175	0.133068	23.6143	24.5459	25.0553	24.9669	23.3581	25.0866
GEMIN5	Gem-associated protein 5	Q8BX17	-1.53446	25.0854	23.5547	2	2	22.7459	23.1808
DGKE	Diacylglycerol kinase epsilon	Q9R1C6	-0.396599	23.9308	25.082	24.7939	24.2304	2	24.3331
TXNDC9	Thioredoxin domain-containing protein 9	Q9CQ79	-0.522338	24.1735	24.0321	25.081	23.6026	23.0101	24.7717
CSNK1A1	Casein kinase I isoform alpha	Q8BK63	-0.551473	24.3471	25.0655	25.0804	24.4518	24.0246	24.4371
ATP6AP1	V-type proton ATPase subunit S1	Q9R1Q9	-0.656382	24.5207	24.6855	25.0787	23.7884	22.3361	25.0645
NOBOX	Homeobox protein NOBOX	Q8VIH1	-0.831251	25.0771	24.8812	21.8605	24.3053	21.5259	23.8998
IPO7	Importin-7	Q9EPL8	-0.814549	24.6087	24.7304	25.0082	23.0855	22.3531	25.0732
RPL9	60S ribosomal protein L9	P51410	-0.017035	24.1834	24.1669	25.0732	24.5697	23.946	24.8981
ISOC1	Isochorismatase domain-containing protein 1	Q91V64	-0.0979278	25.0672	2	22.2804	2	2	24.1645
CIP2A	Protein CIP2A	Q8BWY9	-0.231752	24.4203	24.7267	24.9233	24.2532	23.8121	25.0664
PTGFRN	Prostaglandin F2 receptor negative regulator	Q9WV91	0.118687	23.6824	24.4052	24.169	23.6111	23.4707	25.0518
MTOR	Serine/threonine-protein kinase mTOR	Q9JLN9	-0.504129	23.7014	24.2802	25.0515	23.7678	23.1745	24.561
RTCA	RNA 3'-terminal phosphate cyclase	Q9D7H3	0.0229179	23.8988	24.0168	24.1722	23.3631	22.7114	25.0478
LSM6	U6 snRNA-associated Sm-like protein LSm6	P62313	-0.953962	23.8203	24.1608	25.0478	2	21.3639	24.3094
PPP2R2D	Serine/threonine-protein phosphatase 2A 55 kDa regulatory subunit B delta isoform	Q925E7	-0.56068	24.7429	23.3333	25.0451	24.3431	2	23.4966
TAX1BP1	Tax1-binding protein 1 homolog	Q3UKC1	-0.521673	24.3253	24.4733	25.0387	23.1172	24.1962	24.6624
STXBP6	Syntaxin-binding protein 6	Q8R3T5	-0.0968408	23.2903	24.0909	24.928	23.6775	22.9824	25.0379
MTHFD1L	Monofunctional C1-tetrahydrofolate synthase, mitochondrial	Q3V3R1	-0.038576	24.0097	24.6327	24.8251	24.2774	23.9374	25.0321
LSM1	U6 snRNA-associated Sm-like protein LSm1	Q8VC85	-0.0499734	24.0075	24.4383	2	2	21.9229	25.0306
PTPA	Serine/threonine-protein phosphatase 2A activator	P58389	-0.763206	24.2447	24.3962	25.0263	23.3674	23.1459	24.561
STRIP1	Striatin-interacting protein 1	Q8C079	-1.0881	24.1939	24.3914	25.0254	22.8844	2	23.9211
FAF1	FAS-associated factor 1	P54731	-0.478356	23.694	23.3142	25.0175	22.6901	23.7519	24.304
MTMR9	Myotubularin-related protein 9	Q9Z2D0	-0.88287	23.8008	24.462	25.0162	23.3788	22.9832	24.2287
EFL1	Elongation factor-like GTPase 1	Q8C0D5	0.792307	23.2742	23.5274	23.8153	24.0228	23.6615	25.0088
H2BC1	Histone H2B type 1-A	P70696	-0.0718924	22.2614	22.6257	25.0065	22.8856	2	24.3186
MSRA	Mitochondrial peptide methionine sulfoxide reductase	Q9D6Y7	-0.896596	24.3857	24.4962	25.0019	23.6153	22.9229	24.3732
MAPKAP1	Target of rapamycin complex 2 subunit MAPKAP1	Q8BKH7	-1.40476	24.826	21.9407	25.0008	21.4593	20.2985	24.3417
TARS1	Threonine--tRNA ligase 1, cytoplasmic	Q9D0R2	0.220335	24.3719	23.8412	24.7171	24.7369	23.6788	24.9994
GNAI3	Guanine nucleotide-binding protein G	Q9DC51	-0.560006	24.1232	24.5387	24.999	23.6031	23.5775	24.6545
TUBA1A	Tubulin alpha-1A chain	P68369	-22.7653	24.5244	24.7337	24.9985	2	2	2
APOE	Apolipoprotein E	P08226	-0.292966	24.712	24.3027	24.8163	23.9672	23.6911	24.9973
BZW1	eIF5-mimic protein 2	Q9CQC6	-0.765189	24.5475	24.4558	24.9937	22.7846	23.5723	24.7351
NAA11	N-alpha-acetyltransferase 11	Q3UX61	-0.89746	23.3711	24.2509	24.9928	23.5875	20.5363	24.2778
RAB4B	Ras-related protein Rab-4B	Q91ZR1	0.839959	23.0696	23.8626	23.628	23.3638	2	24.9926
STUB1	E3 ubiquitin-protein ligase CHIP	Q9WUD1	-0.644392	24.7518	24.6956	24.4594	23.7598	21.3298	24.9923
UBR4	E3 ubiquitin-protein ligase UBR4	A2AN08	-1.39893	20.3258	21.4522	24.9913	19.8955	23.0461	22.1326
DOP1B	Protein dopey-2	Q3UHQ6	-0.353062	24.4377	24.8193	24.8974	24.1412	23.6999	24.9893
CAB39L	Calcium-binding protein 39-like	Q9DB16	-0.623338	23.7026	24.5321	24.9874	23.5355	23.477	24.4151
RAB27A	Ras-related protein Rab-27A	Q9ERI2	-0.818137	23.6691	24.9844	23.0857	24.0409	21.9206	23.2837
ANKFY1	Rabankyrin-5	Q810B6	-0.533769	24.6473	24.4793	24.9695	24.1081	22.45	24.9841
HID1	Protein HID1	Q8R1F6	-1.12929	23.7934	23.7983	24.983	22.5531	21.7888	24.1564
HDAC2	Histone deacetylase 2	P70288	-0.903688	24.0491	24.6207	24.9814	22.8184	23.1507	24.5203
TPD52L2	Tumor protein D54	Q9CYZ2	-1.00684	23.5736	24.3402	24.9794	23.5411	22.0593	23.9904
MLH1	DNA mismatch repair protein Mlh1	Q9JK91	-1.16338	2	24.6664	24.9782	24.409	23.3791	22.6932
CD2AP	CD2-associated protein	Q9JLQ0	-0.198859	24.5898	24.7323	24.1543	23.8936	23.734	24.9765
ARL2	ADP-ribosylation factor-like protein 2	Q9D0J4	-1.01067	23.9638	23.9397	24.9753	21.6434	23.2136	24.2151
CAB39	Calcium-binding protein 39	Q06138	0.156334	24.4145	24.3078	24.9489	24.7847	24.4103	24.9742
TPR	Nucleoprotein TPR	F6ZDS4	-2.91474	2	2	24.9735	20.8463	21.644	22.9213
GJA4	Gap junction alpha-4 protein	P28235	-1.98956	24.1841	24.9719	23.9946	22.7773	21.8602	22.5868
KCTD3	BTB/POZ domain-containing protein KCTD3	Q8BFX3	-3.14385	21.8974	24.645	24.9699	19.8742	2	21.8541
DNAJB1	DnaJ homolog subfamily B member 1	Q9QYJ3	-0.295283	23.3023	24.1802	24.9694	23.8213	23.7565	24.371
PTER	Phosphotriesterase-related protein	Q60866	-0.418067	24.4548	24.8702	24.5737	23.8683	23.3572	24.9668
STT3A	Dolichyl-diphosphooligosaccharide--protein glycosyltransferase subunit STT3A	P46978	-0.0765103	24.0345	24.2772	24.7924	23.9858	23.713	24.9659
ABCE1	ATP-binding cassette sub-family E member 1	P61222	-0.321832	24.2249	22.9006	24.9633	23.7382	23.3275	24.4925
NDUFS7	NADH dehydrogenase [ubiquinone] iron-sulfur protein 7, mitochondrial	Q9DC70	0.125444	22.5248	24.0501	24.9615	24.2863	23.2417	24.8761
MTMR7	Myotubularin-related protein 7	Q9Z2C9	-1.75791	24.4973	24.7874	24.9588	22.9884	21.7084	23.682
STMN2	Stathmin-2	P55821	-0.501869	24.4474	24.1009	24.9556	24.1781	23.5156	24.3147
SOD2	Superoxide dismutase [Mn], mitochondrial	P09671	-0.347822	23.7949	24.6284	24.9547	24.0913	23.8678	24.5276
EIF3A	Eukaryotic translation initiation factor 3 subunit A	P23116	-0.0827171	23.635	24.0354	24.8457	23.8835	23.109	24.9533
AKTIP	AKT-interacting protein	Q64362	-0.560008	24.8195	24.1614	24.3311	21.6549	23.4477	24.9487
ABCB6	ATP-binding cassette sub-family B member 6	Q9DC29	-0.462725	23.9807	24.4282	24.9486	23.7743	23.078	24.7738
LARP4	La-related protein 4	Q8BWW4	-3.21719	2	24.9474	24.901	2	21.7072	2
CYB5B	Cytochrome b5 type B	Q9CQX2	-0.911109	22.2434	24.3828	24.9456	23.1277	22.2631	24.0407
SND1	Staphylococcal nuclease domain-containing protein 1	Q78PY7	-0.496627	24.7594	24.8183	24.9438	24.3658	23.851	24.6982
FOCAD	Focadhesin	A2AKG8	1.14709	22.0326	23.6127	24.1193	24.9428	24.7349	24.1093
TF	Serotransferrin	Q921I1	-0.372045	24.4722	24.5571	24.9418	24.5123	24.1228	24.2361
MEAK7	MTOR-associated protein MEAK7	Q8K0P3	-0.408366	23.7072	24.3413	24.5332	23.4577	19.9116	24.937
PPM1H	Protein phosphatase 1H	Q3UYC0	-0.935117	23.2947	24.1375	24.9339	22.6751	22.2195	24.2689
ASPH	Aspartyl/asparaginyl beta-hydroxylase	Q8BSY0	0.205802	23.2396	24.4415	24.876	24.9307	23.695	24.7208
WDR53	WD repeat-containing protein 53	Q9DB94	-0.372528	23.8578	24.7896	24.9259	23.8967	2	24.4898
ALDH3A2	Aldehyde dehydrogenase family 3 member A2	P47740	-0.261437	23.7853	24.4089	24.9231	24.1835	23.6199	24.5893
STX2	Syntaxin-2	Q00262	-0.51157	2	2	24.8823	24.128	23.8332	24.9224
ALAD	Delta-aminolevulinic acid dehydratase	P10518	-1.45471	23.8601	24.921	24.5551	20.7421	22.8416	24.0077
EPS8	Epidermal growth factor receptor kinase substrate 8	Q08509	-0.295705	23.5266	23.7424	24.9178	23.7211	23.1494	24.5146
VPS33B	Vacuolar protein sorting-associated protein 33B	P59016	-0.268759	24.2204	24.1002	24.0865	23.0554	22.4053	24.9164
DNPEP	Aspartyl aminopeptidase	Q9Z2W0	-0.440311	24.6125	24.6971	24.9143	24.5436	23.7718	24.4846
GPM6B	Neuronal membrane glycoprotein M6-b	P35803	-0.0615025	24.0423	24.6487	23.9264	23.942	23.1558	24.9123
HTRA2	Serine protease HTRA2, mitochondrial	Q9JIY5	-0.0182537	21.2083	24.2909	24.9111	24.1146	23.4231	24.5403
MDM4	Protein Mdm4	O35618	-0.493377	23.4646	24.4317	24.9102	2	23.1068	24.3974
DCTN1	Dynactin subunit 1	O08788	-0.0107625	23.9598	24.6457	24.5901	24.5487	23.4253	24.9093
GNB1	Guanine nucleotide-binding protein G	P62874	-0.390626	24.9072	24.3038	24.3735	23.9737	2	24.3315
NDUFA6	NADH dehydrogenase [ubiquinone] 1 alpha subcomplex subunit 6	Q9CQZ5	0.0610733	22.7296	24.9047	24.3219	2	23.2467	24.9003
MCM3	DNA replication licensing factor MCM3	P25206	0.445668	23.2582	24.0228	23.76	23.8385	23.2355	24.9019
PPP6C	Serine/threonine-protein phosphatase 6 catalytic subunit	Q9CQR6	-0.133179	24.156	24.6242	2	23.1457	2	24.9017
PRDX3	Thioredoxin-dependent peroxide reductase, mitochondrial	P20108	-0.493892	24.9008	24.1432	24.5571	24.1929	22.6187	24.703
ZW10	Centromere/kinetochore protein zw10 homolog	O54692	-0.956072	23.6899	24.9001	24.5591	23.4535	22.1674	24.2285
CYFIP1	Cytoplasmic FMR1-interacting protein 1	Q7TMB8	-0.482	24.0939	24.3926	24.8988	23.924	23.2562	24.5783
MLF1	Myeloid leukemia factor 1	Q9QWV4	-21.391	20.4694	18.3734	24.8954	2	2	2
NDUFS2	NADH dehydrogenase [ubiquinone] iron-sulfur protein 2, mitochondrial	Q91WD5	0.177232	24.0286	24.0899	24.5106	24.4466	23.5829	24.8921
COX17	Cytochrome c oxidase copper chaperone	P56394	-3.63866	24.8921	21.3996	20.5793	2	19.8565	2
TECR	Very-long-chain enoyl-CoA reductase	Q9CY27	-0.500007	22.7596	23.3887	24.891	23.7109	21.0569	24.1699
CARS2	Probable cysteine--tRNA ligase, mitochondrial	Q8BYM8	0.276486	22.8684	24.5263	23.6681	21.7496	24.8897	24.2591
XRCC6	X-ray repair cross-complementing protein 6	P23475	-0.493043	24.1652	24.2859	24.8894	23.7493	23.7248	24.3921
ACLY	ATP-citrate synthase	Q91V92	0.0922501	24.1431	24.2214	24.881	24.4285	24.2466	24.8884
NAPA	Alpha-soluble NSF attachment protein	Q9DB05	-1.00755	23.9675	23.9499	24.8819	22.3204	22.5082	24.2816
PTTG1IP	Pituitary tumor-transforming gene 1 protein-interacting protein	Q8R143	0.115318	24.2175	2	2	24.3329	23.4418	24.8794
RANBP3	Ran-binding protein 3	Q9CT10	-2.3286	2	21.4292	24.8773	21.5634	2	21.7789
ENV1	MLV-related proviral Env polyprotein [Cleaved into: Surface protein	P10404	-0.516223	2	24.3236	24.428	23.0951	22.5053	24.8754
HMCES	Abasic site processing protein HMCES	Q8R1M0	-1.03181	23.8208	23.7432	24.8737	22.9889	2	23.4053
ATP5ME	ATP synthase subunit e, mitochondrial	Q06185	0.36046	2	24.3181	24.6809	2	2	24.8713
SRSF2	Serine/arginine-rich splicing factor 2	Q62093	-0.319598	24.1417	23.7904	24.7093	22.794	23.3248	24.8698
UVRAG	UV radiation resistance-associated protein	Q8K245	0.634082	23.7516	23.5587	22.8351	24.8678	22.1082	2
RPA2	Replication protein A 32 kDa subunit	Q62193	-0.61013	23.931	24.7365	24.8669	24.1609	22.5464	24.5138
DDHD1	Phospholipase DDHD1	Q80YA3	-0.280719	23.6099	24.3197	24.8639	23.6799	23.4386	24.7442
PDIA5	Protein disulfide-isomerase A5	Q921X9	-0.25334	23.9032	24.4827	24.8624	24.1297	23.22	24.8525
MAP2K2	Dual specificity mitogen-activated protein kinase kinase 2	Q63932	0.0249107	24.2447	23.5402	24.7459	24.237	23.4016	24.8579
HIKESHI	Protein Hikeshi	Q9DD02	-1.235	23.8728	23.2819	24.856	2	20.7009	23.7528
SYTL4	Synaptotagmin-like protein 4	Q9R0Q1	0.775441	24.1603	22.5407	23.8249	24.8554	23.7198	24.5047
GNG12	Guanine nucleotide-binding protein G	Q9DAS9	-0.933465	24.0747	2	24.8494	22.5816	23.1212	24.4052
SBDS	Ribosome maturation protein SBDS	P70122	-0.250428	23.505	24.847	23.9539	23.8983	23.4584	24.3827
WDR61	WD repeat-containing protein 61	Q9ERF3	-0.346275	23.8473	24.5937	24.8453	24.027	23.2376	24.7652
OTULIN	Ubiquitin thioesterase otulin	Q3UCV8	0.139632	24.2941	24.8438	24.4304	24.6181	2	24.7427
UBE3A	Ubiquitin-protein ligase E3A	O08759	-0.0124405	24.5455	24.134	24.2689	23.8852	24.0246	24.839
SIRT5	NAD-dependent protein deacylase sirtuin-5, mitochondrial	Q8K2C6	-0.442812	24.2211	24.3648	24.8365	24.2385	22.9398	24.5453
ERGIC3	Endoplasmic reticulum-Golgi intermediate compartment protein 3	Q9CQE7	-0.783243	2	24.2002	24.8322	23.8103	2	23.723
BUB1B	Mitotic checkpoint serine/threonine-protein kinase BUB1 beta	Q9Z1S0	-0.620834	24.1948	23.904	24.8321	24.0845	23.0944	23.874
FKBP8	Peptidyl-prolyl cis-trans isomerase FKBP8	O35465	-0.591435	24.2474	24.1894	24.8305	23.9645	23.1944	24.2351
PGRMC2	Membrane-associated progesterone receptor component 2	Q80UU9	-0.540349	23.5106	24.3454	24.8296	23.7385	22.9175	24.355
CTSD	Cathepsin D	P18242	-0.183114	24.5498	24.2848	24.4059	24.1762	23.322	24.8273
RFK	Riboflavin kinase	Q8CFV9	0.0078479	23.6324	24.2614	24.8269	2	2	24.3289
NAA35	N-alpha-acetyltransferase 35, NatC auxiliary subunit	Q6PHQ8	-0.468569	23.9722	24.3725	24.0923	22.4077	22.3227	24.8242
UQCC2	Ubiquinol-cytochrome-c reductase complex assembly factor 2	Q9CQY6	-2.36287	23.7023	24.3582	24.8233	2	22.0026	2
SLC7A6OS	Probable RNA polymerase II nuclear localization protein SLC7A6OS	Q7TPE5	-1.25564	23.8453	24.2555	24.8226	23.6563	22.2765	23.0734
FAM98A	Protein FAM98A	Q3TJZ6	-1.41877	23.972	22.3395	24.8223	23.1828	22.8363	21.0855
TSPAN14	Tetraspanin-14	Q8QZY6	-0.548617	24.4199	24.0672	24.8206	23.5524	22.5128	24.806
CXADR	Coxsackievirus and adenovirus receptor homolog	P97792	-1.41464	24.5656	21.6729	24.8163	2	22.2983	23.145
RETREG3	Reticulophagy regulator 3	Q9CQV4	-1.10277	23.444	24.535	24.8146	23.8226	22.353	23.2791
NRAS	GTPase NRas	P08556	-1.02844	22.6015	24.8133	24.6494	23.4252	2	23.1098
SNX9	Sorting nexin-9	Q91VH2	-0.627407	23.9729	24.6801	24.8128	23.7536	22.2225	24.7441
PYGB	Glycogen phosphorylase, brain form	Q8CI94	-1.29136	23.9127	24.5739	24.8112	23.0663	20.1449	24.1597
TNFAIP8	Tumor necrosis factor alpha-induced protein 8	Q921Z5	0.140528	2	23.9065	2	22.3237	2	24.8101
CDH2	Cadherin-2	P15116	-0.0169492	24.6662	2	2	24.6312	24.49	24.8087
SMPDL3B	Acid sphingomyelinase-like phosphodiesterase 3b	P58242	-0.546663	24.1563	24.8084	24.1618	24.7511	22.9433	23.1737
TMEM126A	Transmembrane protein 126A	Q9D8Y1	-1.27056	23.9978	23.7768	24.8074	23.7123	22.4727	22.3927
RCC2	Protein RCC2	Q8BK67	-0.25636	22.8646	22.5842	24.8031	21.9263	22.6215	24.6168
KIF14	Kinesin-like protein KIF14	L0N7N1	-0.797146	24.3608	24.4837	24.8029	23.1223	23.1338	24.5409
EIF3J2	Eukaryotic translation initiation factor 3 subunit J-B	Q66JS6	-0.249806	2	23.483	24.8021	23.5009	23.4066	24.7747
RAD51	DNA repair protein RAD51 homolog 1	Q08297	-0.510959	24.1511	24.0495	24.7972	23.0922	23.2673	24.6692
HEPH	Hephaestin	Q9Z0Z4	-0.394491	24.3014	24.7657	24.7682	23.9283	23.7504	24.794
PIGU	Phosphatidylinositol glycan anchor biosynthesis class U protein	Q8K358	-0.970716	2	24.7933	20.8234	22.8224	21.8965	23.5584
SCARB1	Scavenger receptor class B member 1	Q61009	2.45219	21.8782	2	2	24.1891	23.8499	24.7914
ACAD10	Acyl-CoA dehydrogenase family member 10	Q8K370	-0.765571	23.4765	24.1449	24.7899	22.4672	2	24.0549
TBC1D15	TBC1 domain family member 15	Q9CXF4	-0.371906	24.2945	24.5613	24.5398	23.8529	23.2169	24.7885
SH3BGRL3	SH3 domain-binding glutamic acid-rich-like protein 3	Q91VW3	-0.922915	23.9716	24.2072	24.7867	2	22.8229	23.8719
CHMP4B	Charged multivesicular body protein 4b	Q9D8B3	-0.895281	24.0904	24.7389	24.7831	23.2157	22.677	24.5003
TWF1	Twinfilin-1	Q91YR1	-0.28314	23.7707	24.5953	23.9022	23.4897	22.2175	24.7806
MYL6	Myosin light polypeptide 6	Q60605	-0.811194	23.4023	24.2173	24.7801	22.979	22.2742	24.2901
PREB	Prolactin regulatory element-binding protein	Q9WUQ2	-0.674607	24.6666	24.7793	24.6945	23.951	23.9534	24.2001
DCAF11	DDB1- and CUL4-associated factor 11	Q91VU6	-0.329329	24.0574	23.705	24.7785	23.5854	23.065	24.6497
HAUS5	HAUS augmin-like complex subunit 5	Q9D786	-0.0579251	23.6387	24.0498	24.483	23.9213	22.7681	24.7758
WWC2	Protein WWC2	Q6NXJ0	-0.995671	23.7092	24.3874	24.7732	23.0245	22.7877	23.9751
FAM221A	Protein FAM221A	Q8C790	-21.7595	24.7663	21.538	23.3941	2	2	2
TRIM28	Transcription intermediary factor 1-beta	Q62318	-0.464279	23.176	24.6551	24.766	23.3524	22.9283	24.7393
ITM2B	Integral membrane protein 2B	O89051	-0.155567	2	24.2258	2	23.7952	23.2278	24.7625
EXOC1	Exocyst complex component 1	Q8R3S6	0.0548554	23.0536	24.5974	23.851	24.0242	22.4209	24.762
ITGAV	Integrin alpha-V	P43406	-1.5069	23.6691	23.7215	24.7576	22.8624	20.8084	23.2649
CARM1	Histone-arginine methyltransferase CARM1	Q9WVG6	-0.910116	24.2463	24.6242	24.7563	23.3088	23.2482	24.1854
ACOT13	Acyl-coenzyme A thioesterase 13	Q9CQR4	-0.191632	24.7536	23.3605	24.0173	22.0631	2	24.7558
HSDL2	Hydroxysteroid dehydrogenase-like protein 2	Q2TPA8	-0.861349	24.192	24.1913	24.7515	22.048	2	24.2601
ACBD5	Acyl-CoA-binding domain-containing protein 5	Q5XG73	-0.805867	2	24.0876	24.7507	23.651	2	2
LARS1	Leucine--tRNA ligase, cytoplasmic	Q8BMJ2	0.0617921	23.9998	23.9621	24.2469	23.8963	23.4597	24.749
EEF1B	Elongation factor 1-beta	O70251	-0.695232	24.1132	23.7988	24.7447	23.0843	22.4327	24.4569
TMCO1	Calcium load-activated calcium channel	Q921L3	0.459737	23.4	2	22.1935	21.3089	21.0398	24.7376
PTGIS	Prostacyclin synthase	O35074	-0.713296	24.7375	24.4816	24.7238	24.2407	22.2877	24.4742
STXBP2	Syntaxin-binding protein 2	Q64324	-1.41547	23.7901	24.1494	24.7361	21.9909	22.2667	23.7052
EIF3M	Eukaryotic translation initiation factor 3 subunit M	Q99JX4	-0.464092	22.7723	24.0204	24.7339	2	18.1601	24.5684
PDE3A	cGMP-inhibited 3',5'-cyclic phosphodiesterase 3A	Q9Z0X4	-1.6458	21.7661	22.5161	24.7331	22.1675	21.4604	22.0599
MFSD1	Major facilitator superfamily domain-containing protein 1	Q9DC37	-0.203751	23.9123	24.0078	24.6508	23.7724	23.1118	24.7303
PIP4P1	Type 1 phosphatidylinositol 4,5-bisphosphate 4-phosphatase	Q3TWL2	-2.74327	22.3797	24.7275	2	2	21.243	2
HECTD3	E3 ubiquitin-protein ligase HECTD3	Q3U487	-0.586347	23.7786	24.4369	24.4591	22.2905	22.7865	24.7238
PMM2	Phosphomannomutase 2	Q9Z2M7	-0.811552	23.0763	23.4409	24.722	23.4449	21.9662	23.4896
SEMA7A	Semaphorin-7A	Q9QUR8	-0.284621	22.2446	24.6149	24.4223	24.7182	19.9257	23.8417
RBX1	E3 ubiquitin-protein ligase RBX1	P62878	-0.934485	24.7154	23.2606	24.3699	23.3015	2	2
SPAG1	Sperm-associated antigen 1	Q80ZX8	-0.267912	23.7937	24.714	24.0798	24.2229	23.1466	24.3096
CHM	Rab proteins geranylgeranyltransferase component A 1	Q9QXG2	-0.0458038	23.9667	2	2	23.5723	22.8698	24.7133
JAM3	Junctional adhesion molecule C	Q9D8B7	0.560212	23.7556	23.798	22.4374	23.6533	23.2637	24.7129
CHID1	Chitinase domain-containing protein 1	Q922Q9	-0.527665	24.276	24.4234	24.7098	23.9422	23.4873	24.3139
EFTUD2	116 kDa U5 small nuclear ribonucleoprotein component	O08810	-0.454155	24.4504	23.6797	24.638	23.5148	22.5584	24.7096
OS9	Protein OS-9	Q8K2C7	-0.655672	24.3172	23.9242	24.7093	23.3844	22.6728	24.4645
PANK3	Pantothenate kinase 3	Q8R2W9	-1.34808	24.1284	23.3498	24.7085	21.9076	2	23.3708
VPS45	Vacuolar protein sorting-associated protein 45	P97390	-0.710033	23.5032	24.2821	24.7081	22.9902	22.477	24.4121
ABCF1	ATP-binding cassette sub-family F member 1	Q6P542	-0.527478	23.4531	24.7075	23.9477	23.2345	22.5971	24.3901
RAB5A	Ras-related protein Rab-5A	Q9CQD1	-0.248233	23.7041	24.1979	24.7053	24.169	23.8092	24.034
SIL1	Nucleotide exchange factor SIL1	Q9EPK6	-0.301429	24.2201	24.0925	24.7033	24.0261	23.2393	24.607
SPR	Sepiapterin reductase	Q64105	-0.814664	24.119	24.7017	24.6965	23.3391	22.1468	24.6362
PRMT1	Protein arginine N-methyltransferase 1	Q9JIF0	0.03951	2	23.5886	24.7017	24.1071	2	24.4513
GORASP2	Golgi reassembly-stacking protein 2	Q99JX3	-0.133937	22.6743	2	24.6994	23.4524	2	24.2133
NEU3	Sialidase-3	Q9JMH7	-0.388839	23.4627	24.6938	24.4948	23.9414	23.1511	24.4033
EIF4G3	Eukaryotic translation initiation factor 4 gamma 3	Q80XI3	-0.349644	23.9665	24.6904	24.4349	24.3911	23.301	24.2224
CTNND1	Catenin delta-1	P30999	-0.0101389	24.074	23.895	23.6947	23.1934	23.2472	24.6843
UBE2I	SUMO-conjugating enzyme UBC9	P63280	-0.648916	23.2697	24.5332	24.2297	21.6191	22.0373	24.684
DHX9	ATP-dependent RNA helicase A	O70133	-0.878709	24.224	24.679	24.1827	23.0147	22.932	24.1904
ALG1	Chitobiosyldiphosphodolichol beta-mannosyltransferase	Q921Q3	0.108311	22.4621	23.9642	24.6778	24.4891	21.4929	24.6487
RPL34	60S ribosomal protein L34	Q9D1R9	-0.308597	22.81	2	24.6723	22.4332	23.6304	24.4324
ARHGAP12	Rho GTPase-activating protein 12	Q8C0D4	-0.456686	23.6355	24.0806	24.2459	22.8225	21.4621	24.6656
GPCPD1	Glycerophosphocholine phosphodiesterase GPCPD1	Q8C0L9	-1.42094	24.6652	22.6304	22.1389	22.4241	21.8484	22.1587
NKIRAS1	NF-kappa-B inhibitor-interacting Ras-like protein 1	Q8CEC5	0.0299692	2	24.2971	24.6643	2	2	24.5223
PAFAH1B2	Platelet-activating factor acetylhydrolase IB subunit alpha2	Q61206	0.0589761	23.1518	23.715	24.2296	23.4143	22.745	24.6506
MCM7	DNA replication licensing factor MCM7	Q61881	-0.337886	22.9417	24.538	24.6498	24.2018	21.8396	24.4816
RDH10	Retinol dehydrogenase 10	Q8VCH7	-0.855468	2	24.2646	24.6479	21.3573	2	24.454
SYNJ1	Synaptojanin-1	Q8CHC4	-0.765439	24.5707	24.0481	24.6477	23.5091	23.2024	24.1593
LASP1	LIM and SH3 domain protein 1	Q61792	1.22356	22.5914	21.6361	22.3119	24.6476	21.4015	22.3844
NOMO1	Nodal modulator 1	Q6GQT9	-0.289817	23.9808	24.1436	24.6457	24.2093	23.4793	24.1858
PEX6	Peroxisome assembly factor 2	Q99LC9	-1.96902	2	23.3979	24.643	22.8712	20.8138	2
PCCB	Propionyl-CoA carboxylase beta chain, mitochondrial	Q99MN9	-0.248644	23.6698	23.5733	24.643	24.2271	23.1928	23.7959
UQCRFS1	Cytochrome b-c1 complex subunit Rieske, mitochondrial	Q9CR68	-0.0547005	24.6359	23.3652	24.2453	23.6166	2	24.4905
ECHDC1	Ethylmalonyl-CoA decarboxylase	Q9D9V3	-0.15924	22.6454	23.2695	24.6175	22.715	22.2625	24.6355
ZWILCH	Protein zwilch homolog	Q8R060	-0.724934	23.6568	24.3455	24.6352	23.4925	21.7846	24.341
PLD1	Phospholipase D1	Q9Z280	-0.933744	22.0877	24.6347	23.5331	23.5521	21.301	2
BST2	Bone marrow stromal antigen 2	Q8R2Q8	-0.906721	2	23.396	24.6308	22.9245	22.8494	23.749
HSD17B8	(3R)-3-hydroxyacyl-CoA dehydrogenase	P50171	-0.941943	23.8899	23.8493	24.6306	2	21.3613	24.0155
FUS	RNA-binding protein FUS	P56959	-0.756804	23.6642	23.564	24.6284	21.9656	21.0255	24.5359
NUP35	Nucleoporin NUP35	Q8R4R6	-0.270885	23.9969	24.2956	23.87	23.0467	23.113	24.6272
ANKRD27	Ankyrin repeat domain-containing protein 27	Q3UMR0	-0.480092	22.531	2	24.6269	22.9334	22.1078	24.3811
USP4	Ubiquitin carboxyl-terminal hydrolase 4	P35123	-0.0710728	23.4345	24.2178	24.4582	23.9258	23.1742	24.6267
EZR	Ezrin	P26040	-1.38099	23.7838	24.626	24.0698	22.8631	2	22.7801
CNOT9	CCR4-NOT transcription complex subunit 9	Q9JKY0	-0.549425	23.6901	24.1088	24.6242	23.3021	23.3207	24.1379
FAAH	Fatty-acid amide hydrolase 1	O08914	-0.442499	23.1566	24.2163	24.4665	23.003	21.946	24.6228
PPP1R10	Serine/threonine-protein phosphatase 1 regulatory subunit 10	Q80W00	-1.05263	23.6121	23.7678	24.6225	23.0201	2	2
OTUB2	Ubiquitin thioesterase OTUB2	Q9CQX0	-0.424003	2	2	24.4779	23.1071	2	24.6207
ATP5MF	ATP synthase subunit f, mitochondrial	P56135	21.8802	2	2	2	2	22.2865	24.6189
GCH1	GTP cyclohydrolase 1	Q05915	-1.82848	23.019	23.389	24.6178	22.0271	22.0074	2
TOMM70	Mitochondrial import receptor subunit TOM70	Q9CZW5	-0.501086	24.2318	24.3807	24.5824	23.8694	22.5361	24.6151
GFM1	Elongation factor G, mitochondrial	Q8K0D5	-0.0820386	21.8343	24.0506	24.6124	23.9783	23.1847	24.111
HMGA2	High mobility group protein HMGI-C	P52927	-0.79664	21.5825	23.7502	24.612	22.6535	22.9904	23.2188
AP1G1	AP-1 complex subunit gamma-1	P22892	-0.18009	23.769	24.0505	24.0851	23.513	22.5372	24.6099
NDUFS3	NADH dehydrogenase [ubiquinone] iron-sulfur protein 3, mitochondrial	Q9DCT2	-0.0630239	23.7877	23.7429	24.6087	24.1575	23.0532	24.5389
GPX1	Glutathione peroxidase 1	P11352	0.113519	23.5212	23.4274	24.3033	23.2163	23.5546	24.6074
NIT2	Omega-amidase NIT2	Q9JHW2	0.416822	20.0477	2	24.2365	22.934	22.9692	24.6055
FARSB	Phenylalanine--tRNA ligase beta subunit	Q9WUA2	0.0604186	22.7614	23.6445	24.5471	23.3824	23.2872	24.6029
SCFD2	Sec1 family domain-containing protein 2	Q8BTY8	-0.452583	23.6694	24.1379	24.6026	23.6935	22.7494	24.3401
ERLEC1	Endoplasmic reticulum lectin 1	Q8VEH8	-0.446422	23.8158	23.8001	24.5675	23.2705	22.0094	24.6018
RNF141	RING finger protein 141	Q99MB7	-22.5819	2	24.6	24.5635	2	2	2
LYZ1	Lysozyme C-1	P17897	0.10987	24.0502	23.9565	24.2549	24.1162	24.5996	23.7704
BROX	BRO1 domain-containing protein BROX	Q8K2Q7	-1.09152	23.8622	2	24.5984	2	23.1853	2
RAB8A	Ras-related protein Rab-8A	P55258	-0.246413	24.0375	24.4239	24.475	24.1164	23.1951	24.5958
UBE2V1	Ubiquitin-conjugating enzyme E2 variant 1	Q9CZY3	-0.59686	24.2918	23.5854	23.6017	21.4223	21.0409	24.5955
CNOT11	CCR4-NOT transcription complex subunit 11	Q9CWN7	-0.422463	23.6678	23.8235	24.5925	23.8313	22.8936	24.0341
NCKAP1	Nck-associated protein 1	P28660	-0.49836	24.1145	23.9519	24.54	23.4266	22.2695	24.5916
NCSTN	Nicastrin	P57716	-0.178037	23.6071	24.1122	24.463	23.7786	22.9562	24.5889
SF3B3	Splicing factor 3B subunit 3	Q921M3	0.413196	23.738	23.3845	24.0985	24.2152	23.5678	24.5882
ERGIC2	Endoplasmic reticulum-Golgi intermediate compartment protein 2	Q9CR89	-1.40979	23.6906	23.9095	24.5871	2	2	22.7049
RPS24	40S ribosomal protein S24	P62849	-0.245395	2	21.9637	24.5849	23.6802	2	23.4218
STAMBP	STAM-binding protein	Q9CQ26	-0.0351865	24.4767	23.5889	24.5837	24.1499	23.9541	24.5621
THNSL1	Threonine synthase-like 1	Q8BH55	-0.470199	23.8901	24.1126	24.5836	23.3187	22.8425	24.5453
SURF1	Surfeit locus protein 1	P09925	-1.11584	22.8415	23.1363	24.5813	22.4202	22.791	2
ACAD11	Acyl-CoA dehydrogenase family member 11	Q80XL6	0.744468	23.6989	23.8158	23.9773	2	2	24.5797
AKAP12	A-kinase anchor protein 12	Q9WTQ5	-0.563202	23.8209	24.2717	24.5778	23.6247	22.8168	24.2794
MAN2C1	Alpha-mannosidase 2C1	Q91W89	-0.392286	24.1188	23.9026	24.2409	23.0485	22.7952	24.5743
DYM	Dymeclin	Q8CHY3	-0.391936	23.3691	24.2362	24.5722	23.599	23.7509	23.8862
PDCD2L	Programmed cell death protein 2-like	Q8C5N5	-0.820896	23.9874	23.228	24.5713	22.9657	2	23.4171
SPCS1	Signal peptidase complex subunit 1	Q9D958	-0.159821	22.747	2	24.5711	2	22.6079	24.4054
HEATR6	HEAT repeat-containing protein 6	Q6P1G0	-0.759404	2	2	24.571	23.3989	2	24.1321
TOM1L1	TOM1-like protein 1	Q923U0	-21.9341	24.2762	24.5682	21.464	2	2	2
PDAP1	28 kDa heat- and acid-stable phosphoprotein	Q3UHX2	-2.38785	21.8505	24.5646	24.4299	21.6367	2	2
TLN2	Talin-2	Q71LX4	-0.851299	23.7594	24.0586	24.563	23.0756	22.1854	24.076
FHIP1A	FHF complex subunit HOOK interacting protein 1A	Q505K2	0.511376	22.8457	22.5934	24.4923	23.3733	2	24.5602
ATP6V1D	V-type proton ATPase subunit D	P57746	-0.212318	23.7445	24.3443	24.5594	24.2023	23.6704	24.1947
FLII	Protein flightless-1 homolog	Q9JJ28	-0.0644371	23.9384	23.4372	24.5582	23.9648	23.4532	24.3912
TDRD5	Tudor domain-containing protein 5	Q5VCS6	-0.900115	24.4709	23.8417	24.557	22.39	22.9553	24.2616
ATP6V0C	V-type proton ATPase 16 kDa proteolipid subunit c	P63082	-0.563858	23.3825	23.7406	24.2128	21.8348	20.6225	24.5567
MYO1E	Unconventional myosin-Ie	E9Q634	0.681709	23.2157	23.0759	23.0057	23.4224	22.8226	24.5555
DKC1	H/ACA ribonucleoprotein complex subunit DKC1	Q9ESX5	0.259907	24.0468	22.913	23.1163	22.4654	23.3535	24.5514
MARS1	Methionine--tRNA ligase, cytoplasmic	Q68FL6	-0.437724	23.7151	23.9178	24.55	23.596	21.8933	24.4817
ERLIN2	Erlin-2	Q8BFZ9	0.0436241	23.5024	24.3122	24.3506	23.5918	2	24.5484
MARK2	Serine/threonine-protein kinase MARK2	Q05512	-0.235399	23.691	24.3675	24.5469	23.981	23.4848	24.4179
EIF2A	Eukaryotic translation initiation factor 2A	Q8BJW6	-0.293991	23.9883	24.1391	24.5463	23.7573	23.512	24.4224
PRKAG1	5'-AMP-activated protein kinase subunit gamma-1	O54950	1.55998	21.2344	22.459	22.8369	22.6227	2	24.5433
NMT1	Glycylpeptide N-tetradecanoyltransferase 1	O70310	-1.42343	22.3499	22.8093	24.5424	22.3966	21.8852	22.0847
CDIPT	CDP-diacylglycerol--inositol 3-phosphatidyltransferase	Q8VDP6	0.589078	2	23.3586	23.7528	23.6348	2	24.5415
VTI1B	Vesicle transport through interaction with t-SNAREs homolog 1B	O88384	-0.770839	24.4395	24.5391	24.4891	24.0732	23.5592	23.444
NINJ1	Ninjurin-1	O70131	-22.2404	23.504	24.4684	24.5373	2	2	2
PDP1	[Pyruvate dehydrogenase [acetyl-transferring]]-phosphatase 1, mitochondrial	Q3UV70	-0.079127	22.6709	23.5467	24.5356	23.7508	22.3147	24.3652
NHLRC2	NHL repeat-containing protein 2	Q8BZW8	-0.626642	23.7362	23.8271	24.5354	23.471	22.7861	23.8931
VPS4B	Vacuolar protein sorting-associated protein 4B	P46467	-0.308601	24.1778	24.5345	24.3015	24.0024	23.9346	24.1643
HNRNPU	Heterogeneous nuclear ribonucleoprotein U	Q8VEK3	0.283612	23.5039	23.5967	23.8235	23.7477	23.2126	24.5277
LSM14A	Protein LSM14 homolog A	Q8K2F8	0.214813	24.1323	2	23.9115	23.8827	2	24.5277
RAC3	Ras-related C3 botulinum toxin substrate 3	P60764	-0.565413	2	21.7475	24.5254	22.7959	2	23.4444
NAE1	NEDD8-activating enzyme E1 regulatory subunit	Q8VBW6	-1.32359	23.457	23.6854	24.5253	23.338	22.4064	21.7288
GSTM1	Glutathione S-transferase Mu 1	P10649	0.103644	24.5233	2	23.152	2	2	24.0984
ARPC1A	Actin-related protein 2/3 complex subunit 1A	Q9R0Q6	0.449474	23.1124	23.0796	24.2519	24.4213	22.3157	24.5214
AHCYL1	S-adenosylhomocysteine hydrolase-like protein 1	Q80SW1	-0.816546	24.5173	21.8077	22.1392	21.8536	21.8305	23.3676
RAE1	mRNA export factor	Q8C570	-0.691382	24.1777	24.5155	23.6804	23.7248	20.5074	24.2225
FXYD6	FXYD domain-containing ion transport regulator 6	Q9D164	21.7788	2	2	2	22.1976	2	24.515
GTSE1	G2 and S phase-expressed protein 1	Q8R080	-0.37797	23.6642	24.4908	24.5133	23.9322	23.315	24.279
USE1	Vesicle transport protein USE1	Q9CQ56	-0.444142	23.6747	24.0662	24.4898	23.393	22.2996	24.51
HES1	Transcription factor HES-1	P35428	-1.14816	2	24.4666	24.5096	23.3401	2	2
CACYBP	Calcyclin-binding protein	Q9CXW3	-0.375079	24.1434	24.3519	2	23.3977	23.4338	24.5053
RPL15	60S ribosomal protein L15	Q9CZM2	-0.617477	23.2651	23.8195	24.5021	24.0348	21.2479	23.5202
SUPT16H	FACT complex subunit SPT16	Q920B9	-0.564094	24.0497	24.2498	24.5004	23.8403	23.211	23.9814
PAK4	Serine/threonine-protein kinase PAK 4	Q8BTW9	-0.943309	2	23.6633	24.4991	23.4475	21.7297	23.733
TMEM43	Transmembrane protein 43	Q9DBS1	-0.468821	23.7974	24.4514	23.9863	23.5864	21.447	24.4962
SERPINI1	Neuroserpin	O35684	-0.209181	22.9746	23.0081	24.4946	2	21.4705	24.278
RABGAP1	Rab GTPase-activating protein 1	A2AWA9	-0.375784	23.865	24.4922	24.3527	23.7933	23.6608	24.1545
REXO2	Oligoribonuclease, mitochondrial	Q9D8S4	-1.22286	2	2	24.4921	2	23.3293	23.2065
DHRS13	Dehydrogenase/reductase SDR family member 13	Q5SS80	-0.804008	24.0897	24.0981	24.4917	23.0906	22.5934	24.1613
ATAD3	ATPase family AAA domain-containing protein 3	Q925I1	-1.27676	23.9464	24.4905	24.3682	22.8453	22.1336	23.6541
JUP	Junction plakoglobin	Q02257	0.235002	23.1472	22.3572	23.9532	24.487	21.8704	23.1053
MBOAT7	Lysophospholipid acyltransferase 7	Q8CHK3	1.10181	2	21.0073	23.5344	22.7569	2	24.4869
EPS15L1	Epidermal growth factor receptor substrate 15-like 1	Q60902	-0.411673	23.7561	23.5591	24.4842	23.7854	23.0633	23.7755
MCM2	DNA replication licensing factor MCM2	P97310	0.979619	22.3367	22.8441	22.7414	23.263	22.414	24.484
SMAP2	Stromal membrane-associated protein 2	Q7TN29	0.0727393	23.6947	23.7417	24.2017	24.1073	22.8938	24.4836
ARHGAP28	Rho GTPase-activating protein 28	Q8BN58	-0.93637	21.0741	24.4826	20.8254	21.7541	22.4369	22.2987
RPL27A	60S ribosomal protein L27a	P14115	-0.904998	23.1879	2	24.4817	23.0903	21.1424	23.8552
NCLN	Nicalin	Q8VCM8	-0.653897	24.1258	24.475	24.4764	23.3017	23.0754	24.3983
SNRPD2	Small nuclear ribonucleoprotein Sm D2	P62317	-0.794682	2	23.2283	24.4757	2	2	23.1881
GALE	UDP-glucose 4-epimerase	Q8R059	-0.438089	21.5063	23.6774	24.4732	23.323	22.5712	23.583
CMTR1	Cap-specific mRNA	Q9DBC3	0.300698	22.1443	22.9655	24.1929	22.4331	23.3236	24.4713
TRNT1	CCA tRNA nucleotidyltransferase 1, mitochondrial	Q8K1J6	-0.546825	24.1467	22.0843	24.4675	22.6221	21.9635	24.3302
PPIH	Peptidyl-prolyl cis-trans isomerase H	Q9D868	-0.040397	2	23.9465	24.3932	23.7403	2	24.4634
MTND5	NADH-ubiquinone oxidoreductase chain 5	P03921	0.106386	23.5032	23.4739	24.2147	22.8887	2	24.4615
ARHGAP1	Rho GTPase-activating protein 1	Q5FWK3	-0.640619	24.3156	24.4613	24.4206	23.1936	23.3814	24.3971
DAD1	Dolichyl-diphosphooligosaccharide--protein glycosyltransferase subunit DAD1	P61804	-0.0873715	2	22.3173	24.3988	2	21.4397	24.4484
MMUT	Methylmalonyl-CoA mutase, mitochondrial	P16332	-0.91644	21.6844	24.4484	22.6806	22.37	21.6389	23.0675
MAP1B	Microtubule-associated protein 1B	P14873	-21.8318	23.9206	22.5302	24.4461	2	2	2
PDPR	Pyruvate dehydrogenase phosphatase regulatory subunit, mitochondrial	Q7TSQ8	0.569817	22.8642	23.008	23.696	23.4293	23.237	24.4453
PRXL2A	Peroxiredoxin-like 2A	Q9CYH2	-22.1106	23.8418	24.4401	23.9801	2	2	2
PIGT	GPI transamidase component PIG-T	Q8BXQ2	-0.592642	23.8246	23.7811	24.4395	23.4547	22.5746	23.9982
STBD1	Starch-binding domain-containing protein 1	Q8C7E7	-0.654603	23.8172	23.707	24.4325	23.3555	22.3929	23.9524
LNPK	Endoplasmic reticulum junction formation protein lunapark	Q7TQ95	-1.08909	2	24.4311	21.5493	22.6314	20.9281	23.1978
ADD1	Alpha-adducin	Q9QYC0	-0.733051	24.4293	23.5649	23.8215	22.7948	22.2079	24.0899
UMPS	Uridine 5'-monophosphate synthase	P13439	-0.962366	23.8075	23.7295	24.4287	22.8845	22.5401	23.5662
TRAPPC11	Trafficking protein particle complex subunit 11	B2RXC1	-0.591931	23.2359	24.162	24.4279	23.2946	22.3841	24.119
SRPRB	Signal recognition particle receptor subunit beta	P47758	-0.54494	24.0424	24.3843	24.4268	23.9108	22.4836	24.3013
TBC1D10A	TBC1 domain family member 10A	P58802	0.392488	22.6895	22.4008	24.3006	23.7549	22.6846	24.4153
ACADVL	Very long-chain specific acyl-CoA dehydrogenase, mitochondrial	P50544	0.52152	23.1972	23.7423	23.3696	24.1948	22.9202	24.4148
MRRF	Ribosome-recycling factor, mitochondrial	Q9D6S7	0.470076	23.7917	2	23.5152	23.7872	2	24.407
SRP68	Signal recognition particle subunit SRP68	Q8BMA6	-0.16152	23.2321	24.1858	24.1859	23.8977	22.2882	24.403
COPS7B	COP9 signalosome complex subunit 7b	Q8BV13	-0.235806	23.7741	20.8679	24.4024	23.3527	22.4446	23.9512
PIK3C3	Phosphatidylinositol 3-kinase catalytic subunit type 3	Q6PF93	-0.302946	23.7707	24.1757	24.2514	24.4022	21.9045	24.0235
TMEM63B	CSC1-like protein 2	Q3TWI9	-0.492618	23.579	24.4013	24.2286	23.2567	2	23.9069
APOA1	Apolipoprotein A-I	Q00623	-2.12434	22.4852	23.4561	24.3983	2	21.5257	2
UBE2E1	Ubiquitin-conjugating enzyme E2 E1	P52482	-1.10186	22.3425	23.5247	24.3976	23.2888	21.4425	22.3375
FN3KRP	Ketosamine-3-kinase	Q8K274	-0.769268	23.3091	24.2246	24.3914	23.246	21.9083	23.987
SEC23IP	SEC23-interacting protein	Q6NZC7	-0.185103	24.2287	23.3574	24.2577	23.8252	22.8729	24.3808
PPP6R1	Serine/threonine-protein phosphatase 6 regulatory subunit 1	Q7TSI3	-0.618414	22.56	23.1155	24.3806	22.5689	22.6622	23.4318
ABCB7	Iron-sulfur clusters transporter ABCB7, mitochondrial	Q61102	-0.584785	23.9638	24.0734	24.1551	22.4758	22.8408	24.3771
SEPTIN9	Septin-9	Q80UG5	0.319101	24.0756	23.4474	23.4948	23.5762	24.0007	24.3766
CMPK1	UMP-CMP kinase	Q9DBP5	-0.66377	24.3759	23.775	24.3534	24.3566	21.1121	23.5851
LMAN2L	VIP36-like protein	P59481	1.78076	22.0832	22.9628	2	2	2	24.3698
IGSF3	Immunoglobulin superfamily member 3	Q6ZQA6	-1.55657	2	23.7832	24.3669	22.1602	22.2279	23.0683
IDE	Insulin-degrading enzyme	Q9JHR7	0.11948	23.3736	23.5026	24.3667	24.1465	24.2193	23.2699
EIF3K	Eukaryotic translation initiation factor 3 subunit K	Q9DBZ5	0.23049	22.9559	23.6213	23.7778	2	22.5341	24.3667
PRODH	Proline dehydrogenase 1, mitochondrial	Q9WU79	-0.79909	23.5814	24.3653	24.2402	22.2369	22.1941	24.3431
FRMD8	FERM domain-containing protein 8	Q3UFK8	-1.11557	23.302	2	24.3633	23.2462	22.1896	2
NUDCD3	NudC domain-containing protein 3	Q8R1N4	-1.48444	2	23.7369	24.3633	22.6882	20.9345	23.2964
POLDIP2	Polymerase delta-interacting protein 2	Q91VA6	-0.704601	22.5706	23.4597	24.3617	22.9893	2	22.8875
ERO1A	ERO1-like protein alpha	Q8R180	-0.164628	22.6516	23.6936	24.3582	22.9884	23.5868	23.9538
MTDH	Protein LYRIC	Q80WJ7	-0.286535	24.1893	24.3581	23.9555	23.7736	23.4516	24.3128
PSMD13	26S proteasome non-ATPase regulatory subunit 13	Q9WVJ2	-0.0618521	23.7983	23.8529	24.3554	23.9738	2	23.9519
AHSA2	Activator of 90 kDa heat shock protein ATPase homolog 2	Q8N9S3	-0.186403	23.7028	23.7508	24.3544	23.4693	23.5081	24.2324
CAMSAP3	Calmodulin-regulated spectrin-associated protein 3	Q80VC9	-0.319953	24.0999	24.2167	24.2667	23.7424	23.3537	24.3538
ARFGAP3	ADP-ribosylation factor GTPase-activating protein 3	Q9D8S3	1.58803	21.6467	22.4539	22.1769	24.3503	2	22.5664
PDLIM1	PDZ and LIM domain protein 1	O70400	-0.988158	21.5357	24.3483	22.4973	22.291	2	22.27
FLAD1	FAD synthase	Q8R123	-0.871283	23.1124	23.7095	24.3425	22.6353	22.0589	23.6542
TRAPPC3	Trafficking protein particle complex subunit 3	O55013	0.0151191	23.5591	22.8916	24.3401	22.8444	2	24.2782
ROCK2	Rho-associated protein kinase 2	P70336	-0.535502	23.4556	23.8501	24.3376	23.6205	22.8264	23.594
TMEM11	Transmembrane protein 11, mitochondrial	Q8BK08	21.6471	2	2	2	24.333	22.2933	2
ANXA2	Annexin A2	P07356	0.535218	23.4731	22.9857	23.5093	23.5717	23.5903	24.3319
SDCBP	Syntenin-1	O08992	-0.343803	24.0998	24.2695	24.2727	23.8057	23.3018	24.3286
RRM2	Ribonucleoside-diphosphate reductase subunit M2	P11157	-0.739937	23.681	24.3282	23.8902	23.5205	21.8166	23.7642
DPM1	Dolichol-phosphate mannosyltransferase subunit 1	O70152	-0.686785	23.0562	23.8061	24.3277	23.3595	22.0873	23.563
ANO6	Anoctamin-6	Q6P9J9	0.597247	21.2763	2	24.3236	2	2	24.0856
RIDA	2-iminobutanoate/2-iminopropanoate deaminase	P52760	0.146557	23.2642	23.5788	24.32	2	2	23.9377
TIAL1	Nucleolysin TIAR	P70318	-0.739663	2	23.9593	24.3157	2	21.7434	24.1613
SSBP1	Single-stranded DNA-binding protein, mitochondrial	Q9CYR0	-0.890246	23.9168	23.9226	24.3153	23.4607	22.419	23.4213
NDUFB10	NADH dehydrogenase [ubiquinone] 1 beta subcomplex subunit 10	Q9DCS9	-1.05551	24.1455	24.0832	24.3147	22.8619	21.7643	23.9614
HNRNPUL2	Heterogeneous nuclear ribonucleoprotein U-like protein 2	Q00PI9	0.0544414	22.3714	23.6183	22.7358	21.8291	20.68	24.3138
TTK	Dual specificity protein kinase TTK	P35761	-0.502257	23.3827	24.268	24.3135	23.5679	22.9203	23.9611
GNS	N-acetylglucosamine-6-sulfatase	Q8BFR4	-21.8752	23.2444	2	24.3126	2	2	2
ATP6V0A2	V-type proton ATPase 116 kDa subunit a 2	P15920	-0.802879	23.702	24.1613	24.3105	21.4369	23.0317	24.1863
MEN1	Menin	O88559	-0.637717	22.224	22.8086	24.3105	23.3141	20.9602	23.0648
TRIP12	E3 ubiquitin-protein ligase TRIP12	G5E870	-0.221384	22.4104	23.5163	24.3	23.4698	22.8091	23.7207
ITGA2	Integrin alpha-2	Q62469	-1.26828	22.312	2	24.295	23.0927	21.0042	22.257
CHMP1A	Charged multivesicular body protein 1a	Q921W0	-1.57196	2	24.2924	23.8391	2	22.0311	22.8713
ILF2	Interleukin enhancer-binding factor 2	Q9CXY6	0.0321278	24.2906	23.0102	23.9116	24.2343	23.8299	23.4053
GNPAT	Dihydroxyacetone phosphate acyltransferase	P98192	-0.0693207	23.4429	24.1137	24.2904	23.6215	2	24.1727
ATP5PD	ATP synthase subunit d, mitochondrial	Q9DCX2	-0.498519	2	2	24.2881	23.3931	2	24.1003
ZNRD2	Protein ZNRD2	P56873	-21.7155	22.7573	2	24.2863	2	2	2
RACGAP1	Rac GTPase-activating protein 1	Q9WVM1	-0.1086	23.3423	24.1889	24.2838	24.1285	23.0287	24.2279
LYRM4	LYR motif-containing protein 4	Q8K215	-21.4074	24.2813	20.8287	2	2	2	2
TTC4	Tetratricopeptide repeat protein 4	Q8R3H9	-0.599454	22.7956	24.2806	2	23.4055	21.881	23.565
OGA	Protein O-GlcNAcase	Q9EQQ9	0.254836	23.5196	23.0575	23.5526	23.2425	23.1298	24.2781
RNF14	E3 ubiquitin-protein ligase RNF14	Q9JI90	-0.950183	2	22.8466	24.2768	22.6031	21.8783	23.4437
NUP214	Nuclear pore complex protein Nup214	Q80U93	-1.47909	22.6455	24.2759	22.6804	21.7613	21.1645	22.5513
USP19	Ubiquitin carboxyl-terminal hydrolase 19	Q3UJD6	0.0120174	24.1012	23.2872	24.1374	23.9677	23.3054	24.2753
ARRDC1	Arrestin domain-containing protein 1	Q99KN1	0.741835	23.2936	23.4715	22.6498	24.2722	22.7965	24.2609
ARHGEF7	Rho guanine nucleotide exchange factor 7	Q9ES28	-1.37222	21.6616	23.9289	24.2695	22.4317	20.2878	22.9891
PFKP	ATP-dependent 6-phosphofructokinase, platelet type	Q9WUA3	0.250348	2	23.7783	2	23.7408	2	24.2685
TOM1L2	TOM1-like protein 2	Q5SRX1	-0.0033633	23.3655	23.5333	23.7615	23.2819	22.6731	24.2675
VAMP4	Vesicle-associated membrane protein 4	O70480	-0.482098	23.9624	24.1876	23.1456	23.3451	20.1884	24.2661
SMARCC1	SWI/SNF complex subunit SMARCC1	P97496	-1.4061	2	23.7173	24.2661	22.6785	20.33	23.4162
SRP54	Signal recognition particle 54 kDa protein	P14576	-0.621281	24.2657	22.9998	24.0333	22.7443	23.7977	22.9526
DPP3	Dipeptidyl peptidase 3	Q99KK7	-0.111096	24.0146	24.0941	23.6459	23.9326	22.9816	24.2629
PPP1R18	Phostensin	Q8BQ30	-21.5842	2	22.2797	24.2578	2	2	2
GLOD4	Glyoxalase domain-containing protein 4	Q9CPV4	-2.38506	22.6145	2	24.2567	21.2726	2	2
TGOLN1	Trans-Golgi network integral membrane protein 1	Q62313	-0.817017	23.642	22.4132	24.2565	2	2	22.8045
SHCBP1	SHC SH2 domain-binding protein 1	Q9Z179	-0.403187	23.4903	23.7833	24.2563	23.5641	23.2383	23.5965
CIT	Citron Rho-interacting kinase	P49025	-0.384297	23.7165	23.4321	24.2533	23.2533	22.9313	23.9808
UBAP2L	Ubiquitin-associated protein 2-like	Q80X50	-0.646647	22.8733	23.9279	24.2521	23.0742	22.4773	23.6534
SCAMP4	Secretory carrier-associated membrane protein 4	Q9JKV5	-0.209456	23.179	24.2514	21.3711	23.2023	22.3259	23.6233
NUP98	Nuclear pore complex protein Nup98-Nup96	Q6PFD9	-0.656159	22.9365	24.1924	24.2498	23.6484	20.2862	23.8849
FARS2	Phenylalanine--tRNA ligase, mitochondrial	Q99M01	0.258865	24.1913	23.5897	22.2458	23.5967	23.4355	24.2498
SIRT2	NAD-dependent protein deacetylase sirtuin-2	Q8VDQ8	-2.20022	2	2	24.2485	22.7202	21.1427	21.8524
CACFD1	Calcium channel flower homolog	Q8BG21	-5.30566	2	24.2472	24.2085	2	18.9223	2
CNDP2	Cytosolic non-specific dipeptidase	Q9D1A2	-0.113214	23.6963	2	23.8994	2	22.7717	24.2443
FBXO30	F-box only protein 30	Q8BJL1	0.284025	23.7156	22.6561	23.269	24.2429	23.5692	22.2027
GAPVD1	GTPase-activating protein and VPS9 domain-containing protein 1	Q6PAR5	-21.6451	2	22.6105	24.2414	2	2	2
PCNP	PEST proteolytic signal-containing nuclear protein	Q6P8I4	-0.53784	23.1772	23.4131	24.2365	22.911	22.8598	23.5572
TMEM143	Transmembrane protein 143	Q8VD26	0.493013	22.9069	23.8029	2	23.5071	2	24.2348
CSTF2	Cleavage stimulation factor subunit 2	Q8BIQ5	0.45333	21.9771	2	23.3355	23.0505	20.7998	24.2321
DAB2	Disabled homolog 2	P98078	-0.627041	23.4545	24.024	24.2314	23.6258	22.4938	23.5628
CLDN4	Claudin-4	O35054	-22.1062	2	23.9696	24.231	2	2	2
AHCYL2	Putative adenosylhomocysteinase 3	Q68FL4	0.047409	23.9819	23.6392	23.5298	23.4106	23.5528	24.2304
SRPK1	SRSF protein kinase 1	O70551	-1.45365	22.5799	23.7955	24.23	21.7927	21.0633	23.0958
TNPO1	Transportin-1	Q8BFY9	-3.13387	2	24.228	24.142	21.2865	20.1417	21.4205
BECN1	Beclin-1	O88597	0.732902	22.3313	22.355	23.1403	24.2279	21.8674	23.1911
VTI1A	Vesicle transport through interaction with t-SNAREs homolog 1A	O89116	-0.13204	23.6602	24.0933	24.2269	23.6525	2	24.0782
CSNK2B	Casein kinase II subunit beta	P67871	-0.726827	22.6772	24.2238	23.7833	23.5905	2	21.8493
CELF2	CUGBP Elav-like family member 2	Q9Z0H4	-1.17534	2	23.884	24.2205	22.8147	20.9871	23.7191
TRIP13	Pachytene checkpoint protein 2 homolog	Q3UA06	-2.09105	24.2194	21.7084	2	21.2829	2	21.4362
ACOT9	Acyl-coenzyme A thioesterase 9, mitochondrial	Q9R0X4	-0.365308	23.2282	23.8611	24.2186	23.3702	22.3105	24.1463
GALNT12	Polypeptide N-acetylgalactosaminyltransferase 12	Q8BGT9	-21.9333	23.5876	2	24.212	2	2	2
RANBP9	Ran-binding protein 9	P69566	0.0825998	23.2479	23.7714	24.2111	24.1842	2	23.4908
PRKACA	cAMP-dependent protein kinase catalytic subunit alpha	P05132	-1.94925	22.8046	23.6216	24.2076	21.5239	22.5621	19.9996
PARP1	Poly [ADP-ribose] polymerase 1	P11103	-0.942802	24.2061	23.2041	23.1789	22.742	2	22.5966
RICTOR	Rapamycin-insensitive companion of mTOR	Q6QI06	-0.704052	23.4739	23.5688	24.2052	23.6413	22.0829	23.1232
CPNE1	Copine-1	Q8C166	-1.16837	2	23.4996	24.201	22.2939	2	23.0551
ATP1B1	Sodium/potassium-transporting ATPase subunit beta-1	P14094	0.188453	20.9895	24.2004	23.7307	23.4155	2	23.8963
RANGAP1	Ran GTPase-activating protein 1	P46061	-0.46922	23.7112	23.2918	24.1989	23.4265	22.3709	23.7946
DNMT3A	DNA (cytosine-5)-methyltransferase 3A	O88508	-1.60162	20.6329	2	24.1985	21.7139	2	2
STOM	Stomatin	P54116	-0.0793059	23.1512	22.9016	24.0139	24.1972	22.27	22.927
PAQR6	Membrane progestin receptor delta	Q6TCG5	-1.16473	21.6923	24.0693	24.1889	2	21.5897	23.0646
SDC1	Syndecan-1	P18828	0.585295	22.6781	23.9737	21.7019	2	22.843	24.1855
FASN	Fatty acid synthase	P19096	-0.0252568	22.4878	22.9488	24.1847	23.4773	22.1363	23.9481
ZFAND6	AN1-type zinc finger protein 6	Q9DCH6	-0.500454	23.3393	24.1174	24.1812	23.1361	23.0024	23.9488
SRPRA	Signal recognition particle receptor subunit alpha	Q9DBG7	0.054917	23.0709	23.473	24.0023	22.6968	2	24.1798
HGS	Hepatocyte growth factor-regulated tyrosine kinase substrate	Q99LI8	-3.42234	22.045	24.1785	23.3321	20.0064	2	2
EIF2B5	Translation initiation factor eIF-2B subunit epsilon	Q8CHW4	-0.537977	22.364	23.9919	24.1778	22.3625	2	23.6821
FIG4	Polyphosphoinositide phosphatase	Q91WF7	-0.250471	23.5016	23.3989	24.0885	23.0686	22.6331	24.1776
ADGRG1	Adhesion G-protein coupled receptor G1	Q8K209	0.292221	23.0543	22.6812	23.5813	2	21.9097	24.1725
AKT3	RAC-gamma serine/threonine-protein kinase	Q9WUA6	-0.374774	23.0379	23.3581	24.1703	23.2887	21.4272	23.9696
APPL1	DCC-interacting protein 13-alpha	Q8K3H0	0.082679	22.5425	2	23.9747	2	22.2839	24.1659
NLRP4C	NACHT, LRR and PYD domains-containing protein 4C	Q3TKR3	-2.87489	20.1334	23.8938	24.1609	20.7344	18.6478	21.3556
CAPN7	Calpain-7	Q9R1S8	-1.79334	2	22.8932	24.1561	21.8653	2	2
EIF2B4	Translation initiation factor eIF-2B subunit delta	Q61749	-0.304898	23.0649	23.1682	24.1558	2	20.4418	24.1398
STX18	Syntaxin-18	Q8VDS8	-0.20521	23.6691	23.409	23.8501	23.4074	22.1161	24.1547
VTA1	Vacuolar protein sorting-associated protein VTA1 homolog	Q9CR26	-0.920142	23.1754	22.7664	24.1546	23.4641	21.1851	22.161
GART	Trifunctional purine biosynthetic protein adenosine-3 [Includes: Phosphoribosylamine--glycine ligase	Q64737	-0.473704	23.4359	23.4595	24.1525	23.027	2	23.4413
HSDL1	Inactive hydroxysteroid dehydrogenase-like protein 1	Q8BTX9	-1.18326	21.5912	22.3061	24.152	22.4217	21.8349	21.2675
SMAD2	Mothers against decapentaplegic homolog 2	Q62432	-0.16462	23.6843	24.1501	23.7306	23.7152	23.1895	24.0786
AP3M1	AP-3 complex subunit mu-1	Q9JKC8	-1.02261	18.0613	24.0692	24.1498	22.3531	21.866	23.066
ARMC8	Armadillo repeat-containing protein 8	Q9DBR3	0.0192273	22.0434	23.6148	23.7046	22.8714	22.2467	24.149
PECAM1	Platelet endothelial cell adhesion molecule	Q08481	-0.511138	23.5911	23.6651	24.1466	22.7712	22.4516	24.1282
CIAO1	Probable cytosolic iron-sulfur protein assembly protein CIAO1	Q99KN2	-0.331404	22.9698	23.7501	24.146	23.0665	2	23.6185
YKT6	Synaptobrevin homolog YKT6	Q9CQW1	-0.52436	23.4885	24.1454	24.1307	23.3581	23.073	23.7675
DAZAP1	DAZ-associated protein 1	Q9JII5	-0.728785	23.0368	2	24.1405	22.6026	2	23.251
BSPRY	B box and SPRY domain-containing protein	Q80YW5	-0.773264	23.7943	24.1234	24.1388	2	22.0742	23.8944
MGAT4A	Alpha-1,3-mannosyl-glycoprotein 4-beta-N-acetylglucosaminyltransferase A	Q812G0	0.35029	22.9089	22.9035	23.3873	22.2396	24.1295	23.3543
SPECC1L	Cytospin-A	Q2KN98	-0.175385	22.8282	24.1264	23.8794	23.4982	22.6666	24.0991
ACP1	Low molecular weight phosphotyrosine protein phosphatase	Q9D358	-1.11836	2	21.8707	24.1182	2	18.7408	23.2119
MAT1A	S-adenosylmethionine synthase isoform type-1	Q91X83	-0.195143	23.2797	23.7551	24.1177	22.9278	2	24.0016
COX6C	Cytochrome c oxidase subunit 6C	Q9CPQ1	-0.615008	23.5917	24.0716	24.1156	2	2	23.33
DPCD	Protein DPCD	Q8BPA8	-2.71408	2	23.2816	24.1142	2	2	21.0431
OXSR1	Serine/threonine-protein kinase OSR1	Q6P9R2	-0.0842643	23.2351	23.3069	23.8911	23.2817	22.3834	24.1101
SMC2	Structural maintenance of chromosomes protein 2	Q8CG48	0.00988716	23.2876	24.0541	24.0082	23.7742	23.5619	24.1101
NPC1	NPC intracellular cholesterol transporter 1	O35604	-0.675851	23.6501	24.1096	23.1639	23.8881	21.3551	22.7888
GMPPB	Mannose-1-phosphate guanyltransferase beta	Q8BTZ7	-0.934441	23.313	23.3601	24.1067	23.008	21.8777	22.9761
CSNK2A2	Casein kinase II subunit alpha'	O54833	-0.506514	23.9205	24.1053	23.0837	2	22.0617	23.9056
CALCOCO1	Calcium-binding and coiled-coil domain-containing protein 1	Q8CGU1	0.381735	22.9551	23.2851	23.7972	23.3389	2	24.1009
TOMM40	Mitochondrial import receptor subunit TOM40 homolog	Q9QYA2	2.25781	21.6009	2	2	23.5676	2	24.1008
FAF2	FAS-associated factor 2	Q3TDN2	0.0963061	23.3328	21.0346	24.0432	2	21.7023	24.099
TRAPPC13	Trafficking protein particle complex subunit 13	Q3TIR1	-0.875522	23.1383	23.4566	24.0978	22.6412	20.4985	23.6397
ABL2	Tyrosine-protein kinase ABL2	Q4JIM5	-0.391596	22.8969	24.0973	23.5553	23.3992	22.1083	23.6808
CLCN5	H(+)/Cl(-) exchange transporter 5	Q9WVD4	-1.06016	24.0963	22.1453	23.4117	2	2	22.3625
RDH12	Retinol dehydrogenase 12	Q8BYK4	-0.291522	22.892	23.3357	24.0959	23.2318	21.623	23.9827
UQCRQ	Cytochrome b-c1 complex subunit 8	Q9CQ69	-0.552598	24.0948	23.0415	23.2214	22.4073	22.2904	23.7469
MYO1C	Unconventional myosin-Ic	Q9WTI7	-0.152157	22.2711	22.5954	24.0935	23.2017	20.9907	23.8029
AMACR	Alpha-methylacyl-CoA racemase	O09174	-0.90622	23.9955	23.7639	24.0916	22.5238	23.1767	23.3309
PDCD10	Programmed cell death protein 10	Q8VE70	-1.56364	2	23.7006	24.0883	22.3438	2	2
NMRAL1	NmrA-like family domain-containing protein 1	Q8K2T1	-0.268265	24.0863	23.5261	22.1622	2	2	23.1904
BTRC	F-box/WD repeat-containing protein 1A	Q3ULA2	0.399279	23.0112	22.9253	23.5131	23.8075	22.2408	24.0858
ACAA2	3-ketoacyl-CoA thiolase, mitochondrial	Q8BWT1	-0.425959	23.751	24.021	24.0802	23.6665	23.081	23.7589
CNOT10	CCR4-NOT transcription complex subunit 10	Q8BH15	-0.801479	22.919	23.877	24.0801	22.7873	21.6063	23.6469
NSUN2	RNA cytosine C	Q1HFZ0	-0.394258	2	22.7586	24.0793	21.153	2	23.9807
YARS1	Tyrosine--tRNA ligase, cytoplasmic	Q91WQ3	2.1118	21.5406	2	2	23.0444	24.0788	2
MATR3	Matrin-3	Q8K310	-0.397933	23.3313	23.9519	23.6335	2	21.2145	24.0773
TRAPPC12	Trafficking protein particle complex subunit 12	Q8K2L8	-0.825148	22.7301	23.9896	24.0761	22.1243	20.2939	24.057
DAG1	Dystroglycan 1	Q62165	3.77407	2	19.801	2	2	22.8024	24.0756
ATG2A	Autophagy-related protein 2 homolog A	Q6P4T0	-0.50789	23.7415	23.1577	24.0755	22.8947	22.6874	23.7718
VPS52	Vacuolar protein sorting-associated protein 52 homolog	Q8C754	-1.31814	23.1103	2	24.0737	23.0887	2	20.7731
EPB41L5	Band 4.1-like protein 5	Q8BGS1	0.402494	22.9487	23.2481	22.4121	22.5204	22.8528	24.0736
WDR48	WD repeat-containing protein 48	Q8BH57	1.80869	20.9662	22.6113	22.006	23.5083	2	24.0735
SGTA	Small glutamine-rich tetratricopeptide repeat-containing protein alpha	Q8BJU0	-0.160047	22.7118	2	24.0722	23.3867	2	2
TDRD3	Tudor domain-containing protein 3	Q91W18	-0.945127	2	24.0707	22.2043	22.1536	21.1528	23.3233
FMR1	Fragile X messenger ribonucleoprotein 1	P35922	-0.551279	23.821	23.2773	24.0674	23.5635	22.5007	23.3533
GNB2	Guanine nucleotide-binding protein G	P62880	-1.07305	22.1233	2	24.0667	22.3271	2	2
ACTL6A	Actin-like protein 6A	Q9Z2N8	-0.697291	23.7461	24.0654	23.8852	23.7254	21.8839	23.4323
TK2	Thymidine kinase 2, mitochondrial	Q9R088	-21.2683	2	21.3807	24.0588	2	2	2
PTK7	Inactive tyrosine-protein kinase 7	Q8BKG3	-0.384613	23.6017	24.0577	20.1848	21.8745	22.6922	23.6776
CLIP1	CAP-Gly domain-containing linker protein 1	Q922J3	-1.15136	21.0372	21.571	24.0536	21.09	2	22.1252
DICER1	Endoribonuclease Dicer	Q8R418	-0.182946	23.7049	23.1688	23.4848	22.4999	22.8128	24.052
MYO5A	Unconventional myosin-Va	Q99104	-0.394147	23.2551	23.5804	24.0515	22.9142	22.4927	23.9836
TCN2	Transcobalamin-2	O88968	-0.00436325	23.7057	23.6757	2	23.2028	2	24.0479
KPNA6	Importin subunit alpha-7	O35345	-0.655208	22.9154	23.2373	24.0409	22.2074	21.5066	23.7835
SOWAHB	Ankyrin repeat domain-containing protein SOWAHB	Q8BZW2	-1.28758	2	24.0365	2	21.4525	2	23.4206
STAU1	Double-stranded RNA-binding protein Staufen homolog 1	Q9Z108	-0.562301	23.6372	23.2527	24.0351	23.0614	22.4866	23.5888
HBS1L	HBS1-like protein	Q69ZS7	-0.351711	22.2994	22.6682	24.0343	22.3425	22.1204	23.6157
SRRT	Serrate RNA effector molecule homolog	Q99MR6	0.168558	2	22.8232	23.2414	21.1423	2	24.0335
CSNK1E	Casein kinase I isoform epsilon	Q9JMK2	-0.362174	23.3878	23.4942	23.948	22.6123	22.6855	24.0329
PHGDH	D-3-phosphoglycerate dehydrogenase	Q61753	-0.454704	23.7996	23.469	23.7225	22.7607	22.242	24.0325
NGEF	Ephexin-1	Q8CHT1	-0.582271	2	21.5699	24.0314	21.9546	21.4392	23.6747
ERMP1	Endoplasmic reticulum metallopeptidase 1	Q3UVK0	-0.0774255	24.0307	23.9557	23.1287	23.5092	23.6979	23.8199
NDUFA12	NADH dehydrogenase [ubiquinone] 1 alpha subcomplex subunit 12	Q7TMF3	0.0744108	23.2771	23.0858	23.8864	22.7683	2	24.0297
PITPNB	Phosphatidylinositol transfer protein beta isoform	P53811	-0.682807	2	2	24.0256	22.6016	2	23.83
COQ9	Ubiquinone biosynthesis protein COQ9, mitochondrial	Q8K1Z0	-1.59205	2	2	24.0239	23.4251	22.1482	20.0196
DCTN4	Dynactin subunit 4	Q8CBY8	-0.559758	23.6094	23.8348	23.4059	22.2017	22.0991	24.0239
PSME3	Proteasome activator complex subunit 3	P61290	-0.225351	22.9784	2	23.5598	22.5301	21.6986	24.0198
NDUFAF7	Protein arginine methyltransferase NDUFAF7, mitochondrial	Q9CWG8	1.62905	2	20.2741	22.2202	20.9525	2	24.0195
MCUR1	Mitochondrial calcium uniporter regulator 1	Q9CXD6	-0.857265	2	24.0151	23.9381	2	22.4174	23.5902
DOCK9	Dedicator of cytokinesis protein 9	Q8BIK4	-0.688944	2	23.6345	23.732	22.5477	20.9688	24.0103
SEC62	Translocation protein SEC62	Q8BU14	0.312624	23.0907	2	2	24.01	21.7634	23.6131
CZIB	CXXC motif containing zinc binding protein	Q8BHG2	-0.395657	23.6591	23.7114	24.0087	2	2	23.4058
SH3GL1	Endophilin-A2	Q62419	-0.445875	22.96	23.0821	24.0086	2	21.1801	23.7618
VARS1	Valine--tRNA ligase	Q9Z1Q9	-0.0074321	22.9523	23.7809	23.2622	23.2425	22.4543	23.9978
IPCEF1	Interactor protein for cytohesin exchange factors 1	Q5DU31	-1.0326	22.9467	23.0333	23.9968	22.4124	21.9412	22.6805
SLC25A48	Solute carrier family 25 member 48	Q8BW66	0.843738	22.9171	23.3553	2	2	2	23.9965
BUB1	Mitotic checkpoint serine/threonine-protein kinase BUB1	O08901	-20.8586	22.2741	20.0647	23.9889	2	2	2
ARHGAP17	Rho GTPase-activating protein 17	Q3UIA2	-21.6145	23.1079	2	23.9888	2	2	2
RTRAF	RNA transcription, translation and transport factor protein	Q9CQE8	-0.507695	23.2136	23.9867	23.7347	23.3465	21.0638	23.8852
GOT1	Aspartate aminotransferase, cytoplasmic	P05201	-0.720975	22.9659	22.7671	23.9829	2	22.702	22.5363
MTARC2	Mitochondrial amidoxime reducing component 2	Q922Q1	-1.53807	2	23.5736	23.9795	22.2527	2	2
ZZEF1	Zinc finger ZZ-type and EF-hand domain-containing protein 1	Q5SSH7	-1.75762	22.2733	2	23.9789	2	20.2481	22.2943
KIF13A	Kinesin-like protein KIF13A	Q9EQW7	-1.70364	2	23.1058	23.9759	22.4476	21.8558	21.095
GLG1	Golgi apparatus protein 1	Q61543	0.26855	22.9453	2	23.9746	2	2	23.8184
TACC2	Transforming acidic coiled-coil-containing protein 2	Q9JJG0	-0.86497	2	23.3873	23.9744	22.6339	22.4953	23.2807
IMPA1	Inositol monophosphatase 1	O55023	-0.844949	22.9828	22.7863	23.9577	22.4827	22.3109	22.6646
AP2A2	AP-2 complex subunit alpha-2	P17427	-0.281365	23.4718	23.4902	23.4699	22.7078	22.4484	23.9543
SEC11A	Signal peptidase complex catalytic subunit SEC11A	Q9R0P6	-0.26209	23.2676	23.4394	23.9432	22.7726	23.1532	23.8252
DERA	Deoxyribose-phosphate aldolase	Q91YP3	-1.29511	23.875	22.4889	23.9424	2	2	22.2761
SNX6	Sorting nexin-6 [Cleaved into: Sorting nexin-6, N-terminally processed]	Q6P8X1	-0.368456	23.1539	23.2782	23.9388	23.0672	2	23.1929
DCAF1	DDB1- and CUL4-associated factor 1	Q80TR8	-1.13126	22.8103	23.1122	23.9381	2	21.0546	22.8786
UBR2	E3 ubiquitin-protein ligase UBR2	Q6WKZ8	0.518329	21.8897	23.3183	22.7368	23.9341	22.7936	22.7913
NUP107	Nuclear pore complex protein Nup107	Q8BH74	-0.869101	23.0365	23.6855	23.9323	23.0246	21.5093	23.1554
ALKBH5	RNA demethylase ALKBH5	Q3TSG4	-0.906548	23.7424	2	23.8146	20.8782	22.2932	23.9287
TMEM245	Transmembrane protein 245	B1AZA5	-0.516	23.7641	23.8431	23.8955	23.3101	22.2668	23.9273
TBC1D1	TBC1 domain family member 1	Q60949	0.233553	2	23.0344	22.8108	22.8479	22.1472	23.9254
TTC5	Tetratricopeptide repeat protein 5	Q99LG4	0.0277519	23.4851	22.4606	23.5003	23.176	22.1176	23.9245
ELAC2	Zinc phosphodiesterase ELAC protein 2	Q80Y81	0.0403097	22.8148	22.4935	23.8196	22.7191	22.5332	23.9234
MTA3	Metastasis-associated protein MTA3	Q924K8	-0.0959293	22.8683	23.1122	23.5565	22.8913	21.7447	23.9223
CRK	Adapter molecule crk	Q64010	-1.07607	2	23.417	23.9215	22.7022	22.0497	22.9508
DRG1	Developmentally-regulated GTP-binding protein 1	P32233	-0.660744	23.6236	23.9037	23.3937	22.1278	22.1471	23.9177
MPC2	Mitochondrial pyruvate carrier 2	Q9D023	-0.306955	23.3411	23.9159	23.7957	23.3122	22.9351	23.8112
ANKLE2	Ankyrin repeat and LEM domain-containing protein 2	Q6P1H6	-0.527411	2	23.3466	23.9117	2	22.2599	23.6679
LRRFIP2	Leucine-rich repeat flightless-interacting protein 2	Q91WK0	0.21856	23.0407	20.6014	23.5737	20.805	2	23.9116
EHD3	EH domain-containing protein 3	Q9QXY6	-1.86822	22.9452	22.7453	23.9112	2	21.4271	2
PIP4K2A	Phosphatidylinositol 5-phosphate 4-kinase type-2 alpha	O70172	-3.90653	23.9085	2	23.6413	2	19.8745	2
TMEM30A	Cell cycle control protein 50A	Q8VEK0	-0.67395	23.0583	23.5058	23.9009	23.8399	21.2588	22.3196
TTYH3	Protein tweety homolog 3	Q6P5F7	-0.127123	23.0143	23.3001	23.4354	22.834	22.0895	23.9008
PPFIBP2	Liprin-beta-2	O35711	-0.187503	23.5166	23.7789	23.6383	23.4682	22.8214	23.8975
CHEK1	Serine/threonine-protein kinase Chk1	O35280	-0.344933	23.6637	23.7875	23.5312	2	22.3468	23.8955
BICD2	Protein bicaudal D homolog 2	Q921C5	-21.0747	21.7495	22.8182	23.8934	2	2	2
NLRP4E	NACHT, LRR and PYD domains-containing protein 4E	Q66X19	0.148815	22.1375	22.5544	22.9449	21.9484	20.3131	23.8901
PPM1B	Protein phosphatase 1B	P36993	-2.15712	22.377	19.9902	23.8891	20.6505	2	2
METAP2	Methionine aminopeptidase 2	O08663	-0.661849	22.4216	22.9157	23.8886	22.6267	21.423	23.1143
ARF4	ADP-ribosylation factor 4	P61750	-0.311183	23.7395	2	2	2	22.7514	23.8873
USP24	Ubiquitin carboxyl-terminal hydrolase 24	B1AY13	-2.04738	20.4332	23.8825	21.9653	19.6569	20.365	21.4663
GNAQ	Guanine nucleotide-binding protein G	P21279	0.261898	23.2512	23.5497	23.1122	23.1998	2	23.8773
CARNMT1	Carnosine N-methyltransferase	Q80UY1	-0.14406	23.0422	23.3738	23.8773	22.6667	2	23.7803
STX4	Syntaxin-4	P70452	-0.594578	22.9153	23.4703	23.8762	22.4336	21.9646	23.6729
COX5A	Cytochrome c oxidase subunit 5A, mitochondrial	P12787	-0.317148	23.4736	22.583	23.8751	2	2	23.0876
PNPLA6	Patatin-like phospholipase domain-containing protein 6	Q3TRM4	-0.257806	22.5952	23.3387	23.0022	21.9934	20.6713	23.8721
LGALS3	Galectin-3	P16110	0.28684	23.3631	22.3268	23.8682	2	2	23.6044
ODR4	Protein odr-4 homolog	Q4PJX1	21.0129	2	2	2	22.6826	21.6806	23.8669
SGPL1	Sphingosine-1-phosphate lyase 1	Q8R0X7	0.270048	20.8128	2	23.5227	20.499	2	23.8644
ESPL1	Separin	P60330	-1.11287	2	23.2727	23.8635	23.0132	20.0227	22.9465
COX7A2L	Cytochrome c oxidase subunit 7A-related protein, mitochondrial	Q61387	-21.1185	21.5772	2	23.8465	2	2	2
BCL2L13	Bcl-2-like protein 13	P59017	0.693885	2	22.3052	2	22.0694	23.8331	22.4688
SARS2	Serine--tRNA ligase, mitochondrial	Q9JJL8	0.280471	20.5137	23.3725	23.6172	23.2544	22.4449	23.8309
SYAP1	Synapse-associated protein 1	Q9D5V6	0.200391	2	23.1089	23.5141	23.1413	2	23.8296
UBAC2	Ubiquitin-associated domain-containing protein 2	Q8R1K1	-0.280731	21.7529	23.7663	23.826	23.7299	22.8353	22.391
MAD2L1	Mitotic spindle assembly checkpoint protein MAD2A	Q9Z1B5	-1.19234	23.4391	21.3848	23.8235	21.9234	22.3894	21.6095
PTPN6	Tyrosine-protein phosphatase non-receptor type 6	P29351	-0.769974	23.5639	23.5802	23.8226	22.3529	22.1044	23.6824
SERPINA1A	Alpha-1-antitrypsin 1-1	P07758	-0.890539	2	22.9509	23.8203	22.2195	2	22.8345
UFC1	Ubiquitin-fold modifier-conjugating enzyme 1	Q9CR09	-21.5755	2	23.2902	23.8135	2	2	2
MINDY1	Ubiquitin carboxyl-terminal hydrolase MINDY-1	Q76LS9	-0.498225	22.8364	22.441	23.8135	22.8987	22.1782	22.7807
BMPR2	Bone morphogenetic protein receptor type-2	O35607	-0.301257	2	23.8117	23.7775	23.4934	2	2
SH3GLB1	Endophilin-B1	Q9JK48	-0.453125	23.1869	23.402	23.7905	22.6901	22.0009	23.81
HDHD5	Haloacid dehalogenase-like hydrolase domain-containing 5	Q91WM2	0.00167357	21.9324	23.3204	23.6931	22.2547	22.9986	23.8081
PIP4K2C	Phosphatidylinositol 5-phosphate 4-kinase type-2 gamma	Q91XU3	1.55135	21.3748	2	22.7991	23.8073	2	2
CHKB	Choline/ethanolamine kinase	O55229	1.10047	2	23.1199	22.0141	23.7366	2	23.8045
CCDC69	Coiled-coil domain-containing protein 69	Q3TCJ8	-21.1655	2	21.9957	23.8029	2	2	2
TEX19.2	Testis-expressed protein 19.2	Q9D5S1	-1.05369	22.8151	23.2177	23.8007	2	22.2815	2
CCS	Copper chaperone for superoxide dismutase	Q9WU84	-3.40814	23.7898	23.2319	21.4783	19.708	2	2
GKAP1	G kinase-anchoring protein 1	Q9JMB0	-0.702344	23.0692	23.2579	23.7864	2	21.8379	23.2383
SF3B1	Splicing factor 3B subunit 1	Q99NB9	0.428156	23.1236	21.2358	23.5275	22.7058	2	23.7814
COL6A6	Collagen alpha-6	Q8C6K9	0.0422068	22.6436	22.6606	23.074	22.1619	21.7762	23.7778
MAP2K1	Dual specificity mitogen-activated protein kinase kinase 1	P31938	-0.0619142	23.7759	23.341	23.5787	23.3745	23.5445	23.6132
SLC18A2	Synaptic vesicular amine transporter	Q8BRU6	0.402355	22.6586	22.6286	23.7743	2	2	23.5279
FDPS	Farnesyl pyrophosphate synthase	Q920E5	1.74564	22.5825	20.7765	22.1566	2	2	23.7649
MCM4	DNA replication licensing factor MCM4	P49717	-0.0438445	22.2732	23.3545	23.1439	22.2627	22.2616	23.7647
PTPRG	Receptor-type tyrosine-protein phosphatase gamma	Q05909	-0.807138	2	22.4337	23.7624	22.349	21.729	22.9738
PACS1	Phosphofurin acidic cluster sorting protein 1	Q8K212	-0.312301	23.6537	2	23.6462	23.7556	22.8243	23.2839
CLPTM1L	Lipid scramblase CLPTM1L	Q8BXA5	-0.580769	23.2328	22.83	23.7501	22.3989	20.3512	23.7535
DDT	D-dopachrome decarboxylase	O35215	-0.584533	2	23.7505	23.7486	2	2	23.165
ATP9A	Probable phospholipid-transporting ATPase IIA	O70228	0.267102	21.6114	22.6403	23.6385	21.9971	2	23.7497
NAA15	N-alpha-acetyltransferase 15, NatA auxiliary subunit	Q80UM3	-0.131179	21.955	22.1224	23.7473	2	21.3326	23.415
FNTA	Protein farnesyltransferase/geranylgeranyltransferase type-1 subunit alpha	Q61239	-0.716261	21.7642	23.2531	23.7412	21.7624	20.5687	23.477
CHMP3	Charged multivesicular body protein 3	Q9CQ10	-0.347689	23.7406	22.8699	23.1147	23.0157	2	22.8646
HPCAL1	Hippocalcin-like protein 1	P62748	-0.234733	2	2	23.7398	23.3475	2	23.647
UROD	Uroporphyrinogen decarboxylase	P70697	0.0859091	22.9375	23.1663	23.2294	22.3439	2	23.7369
ACTR10	Actin-related protein 10	Q9QZB7	-0.0195926	22.8335	22.5169	23.7367	22.9025	22.7644	23.5308
WDR13	WD repeat-containing protein 13	Q91V09	1.13294	2	21.8387	22.4414	23.7352	22.1698	23.5629
ATG3	Ubiquitin-like-conjugating enzyme ATG3	Q9CPX6	-0.279766	2	23.1252	2	22.5671	21.213	23.7352
TMEM72	Transmembrane protein 72	Q8C3K5	-0.625725	2	23.5691	23.7277	2	2	23.0249
DNAJC10	DnaJ homolog subfamily C member 10	Q9DC23	1.44622	22.612	21.1184	21.0301	23.7274	21.8177	23.5071
ZFP57	Zinc finger protein 57	Q8C6P8	-0.9674	22.2829	21.7511	23.7263	21.6009	2	22.0997
GOLGA5	Golgin subfamily A member 5	Q9QYE6	-0.84108	22.7627	22.8725	23.7242	22.6252	21.2706	22.7381
NXN	Nucleoredoxin	P97346	-1.99686	2	22.2147	23.7225	20.9058	20.6321	21.7146
NECTIN1	Nectin-1	Q9JKF6	-1.36585	22.9888	23.72	23.5232	22.5654	2	21.3317
RMDN1	Regulator of microtubule dynamics protein 1	Q9DCV4	-0.096643	23.0255	23.4271	23.3839	22.8841	22.7829	23.7194
STK25	Serine/threonine-protein kinase 25	Q9Z2W1	-0.122831	23.0806	21.8566	23.7082	2	21.9343	23.5332
EPS15	Epidermal growth factor receptor substrate 15	P42567	-0.352547	23.186	23.2303	23.292	22.5328	21.7421	23.7023
SLC6A7	Sodium-dependent proline transporter	Q6PGE7	-1.00795	22.7724	23.4868	23.7006	22.0138	21.7195	23.0189
PAN3	PAN2-PAN3 deadenylation complex subunit Pan3	Q640Q5	-2.03186	23.3359	23.6995	2	2	2	21.4973
RPL35A	60S ribosomal protein L35a	O55142	0.819403	21.8217	21.8761	22.9524	22.7379	22.7502	23.6978
RARS2	Probable arginine--tRNA ligase, mitochondrial	Q3U186	-0.3735	22.7257	23.4398	23.5037	22.0991	22.3186	23.6966
FURIN	Furin	P23188	-0.151363	23.4319	23.6832	2	2	2	23.4117
DTD2	D-aminoacyl-tRNA deacylase 2	Q8BHA3	-21.0623	23.6812	2	21.9555	2	2	2
GPX4	Phospholipid hydroperoxide glutathione peroxidase	Q91XR9	-21.2743	22.9645	23.0716	23.6795	2	2	2
ABI2	Abl interactor 2	P62484	-1.23781	2	2	23.679	22.0513	2	22.7478
PIKFYVE	1-phosphatidylinositol 3-phosphate 5-kinase	Q9Z1T6	0.591872	21.9388	22.8786	22.9075	23.2126	22.6179	23.6739
SLC35F2	Solute carrier family 35 member F2	Q7TML3	-0.28427	22.2742	22.7208	23.6727	22.7909	21.1157	23.4289
TUBGCP2	Gamma-tubulin complex component 2	Q921G8	-0.403296	2	22.9965	23.6726	22.7784	22.0941	23.6303
CBR4	3-oxoacyl-[acyl-carrier-protein] reductase	Q91VT4	-0.183556	22.7944	23.5011	23.6709	22.8616	2	23.4499
OSBPL9	Oxysterol-binding protein-related protein 9	A2A8Z1	-0.268724	22.4729	23.6693	22.7522	21.7408	2	23.3921
MAVS	Mitochondrial antiviral-signaling protein	Q8VCF0	-0.598251	22.4412	23.0183	23.666	22.7798	21.3217	22.9922
GALK1	Galactokinase	Q9R0N0	-0.58574	2	23.6447	22.5006	2	22.5012	22.6877
SLC44A1	Choline transporter-like protein 1	Q6X893	-0.718206	23.1215	23.6443	23.6162	23.1384	21.6961	23.0529
FAM114A2	Protein FAM114A2	Q8VE88	0.139851	21.8877	22.3074	23.6433	22.8221	22.1112	23.5736
TRAPPC5	Trafficking protein particle complex subunit 5	Q9CQA1	0.285161	21.4769	23.3651	2	22.9142	22.0029	23.6293
LAPTM4B	Lysosomal-associated transmembrane protein 4B	Q91XQ6	21.3264	2	2	2	22.9461	2	23.6271
SPATA5	Ribosome biogenesis protein SPATA5	Q3UMC0	-0.389454	21.6747	22.9751	23.1752	20.7367	20.4313	23.6231
SCRN2	Secernin-2	Q8VCA8	-0.511207	21.8653	23.1531	23.6193	22.2675	21.2413	23.3564
BTBD1	BTB/POZ domain-containing protein 1	P58544	20.9778	2	2	2	23.6173	21.801	2
FAM177A1	Protein FAM177A1	Q8BR63	-1.46977	22.9701	22.4322	23.6171	22.4152	19.6866	2
CDC42BPB	Serine/threonine-protein kinase MRCK beta	Q7TT50	-0.804479	22.5944	22.8243	23.6092	22.911	21.5254	22.0358
RRBP1	Ribosome-binding protein 1	Q99PL5	-1.57719	22.7133	22.6729	23.5958	20.8205	21.119	22.1534
GSTK1	Glutathione S-transferase kappa 1	Q9DCM2	-0.530081	23.2169	23.4296	23.5955	23.0761	22.0156	23.2921
CPSF3	Cleavage and polyadenylation specificity factor subunit 3	Q9QXK7	0.286121	22.4167	22.7856	23.1984	22.4117	2	23.5953
DCBLD2	Discoidin, CUB and LCCL domain-containing protein 2	Q91ZV3	-0.560695	21.4411	22.5489	23.5949	21.1473	2	22.8316
NAPRT	Nicotinate phosphoribosyltransferase	Q8CC86	-0.101836	23.2681	22.0407	23.5947	23.3397	22.8123	22.791
ACACB	Acetyl-CoA carboxylase 2	E9Q4Z2	-0.83679	22.9593	21.9719	23.5895	20.5582	21.5924	23.138
SNRPN	Small nuclear ribonucleoprotein-associated protein N	P63163	0.0644682	21.3546	23.586	23.0813	2	2	23.0049
AARS2	Alanine--tRNA ligase, mitochondrial	Q14CH7	-0.867965	20.926	22.0279	23.5851	22.2603	21.1308	21.5213
TTC38	Tetratricopeptide repeat protein 38	A3KMP2	-1.12483	22.8616	22.7073	23.5832	21.4093	21.6694	22.5818
PTPN23	Tyrosine-protein phosphatase non-receptor type 23	Q6PB44	-0.0420973	22.9003	23.3977	2	22.9511	22.7051	23.5821
IFIT1	Interferon-induced protein with tetratricopeptide repeats 1	Q64282	-0.0215141	22.7346	23.1512	23.5808	22.8242	2	23.4572
HNRNPAB	Heterogeneous nuclear ribonucleoprotein A/B	Q99020	-0.382301	20.5857	23.2354	23.3834	20.741	21.486	23.5742
SYNRG	Synergin gamma	Q5SV85	-1.05966	22.802	23.1233	23.5727	2	2	22.1412
SCCPDH	Saccharopine dehydrogenase-like oxidoreductase	Q8R127	-1.36964	2	22.6025	23.5727	21.9962	2	21.5681
ACSF2	Medium-chain acyl-CoA ligase ACSF2, mitochondrial	Q8VCW8	-1.0319	22.4065	22.7486	23.5696	21.5466	22.1293	22.1344
TXNRD3	Thioredoxin reductase 3	Q99MD6	0.177793	23.0471	22.4816	22.7982	23.0057	21.8656	23.5679
KLHL8	Kelch-like protein 8	P59280	0.234342	22.8294	21.9897	22.7473	23.5671	22.2307	22.133
MIA2	Melanoma inhibitory activity protein 2	Q91ZV0	-0.242311	23.1322	22.7904	23.5567	22.7231	22.2502	23.5666
VCPIP1	Deubiquitinating protein VCPIP1	Q8CDG3	-0.10689	22.6079	22.3398	23.5663	22.9059	22.2414	23.1919
NINJ2	Ninjurin-2	Q9JL89	-0.527388	2	22.5794	23.5649	2	21.4906	23.2551
MTFR1L	Mitochondrial fission regulator 1-like	Q9CWE0	0.0463533	22.7402	2	23.4801	22.7298	2	23.5594
ACAD9	Complex I assembly factor ACAD9, mitochondrial	Q8JZN5	0.300429	23.1437	23.0958	22.546	23.5055	22.4508	23.5583
TIMM17A	Mitochondrial import inner membrane translocase subunit Tim17-A	Q9Z0V8	1.40014	22.5759	2	21.5626	2	2	23.5566
MCAT	Malonyl-CoA-acyl carrier protein transacylase, mitochondrial	Q8R3F5	-1.17917	22.5395	22.9393	23.5545	2	21.6228	22.1207
ATP11C	Phospholipid-transporting ATPase 11C	Q9QZW0	0.440418	22.873	20.7352	23.5509	23.4804	2	22.9212
RNF34	E3 ubiquitin-protein ligase RNF34	Q99KR6	-1.25526	23.4591	23.5437	22.7189	21.2065	2	22.5507
PEX16	Peroxisomal membrane protein PEX16	Q91XC9	-1.06642	23.1861	23.5407	23.3828	22.3107	2	2
MIA3	Transport and Golgi organization protein 1 homolog	Q8BI84	-0.0193387	20.6265	22.6174	23.5401	22.4112	2	22.8846
RFC4	Replication factor C subunit 4	Q99J62	-0.568292	22.3902	22.2559	23.5393	21.5756	20.8838	23.2886
STX8	Syntaxin-8	O88983	0.0119641	20.2901	23.5329	2	23.1173	22.0795	2
SLC30A9	Zinc transporter 9	Q5IRJ6	-0.310634	23.5245	23.3332	23.0124	23.2535	22.4541	23.1528
ABRAXAS2	BRISC complex subunit Abraxas 2	Q3TCJ1	-0.38217	22.2939	21.2261	23.524	21.7243	20.5436	23.2664
WNK1	Serine/threonine-protein kinase WNK1	P83741	0.468269	22.1209	22.7954	23.1019	22.9514	23.5214	23.05
RFC3	Replication factor C subunit 3	Q8R323	-0.654548	22.207	23.1006	23.5158	21.8681	21.7818	23.0975
ANGEL1	Protein angel homolog 1	Q8VCU0	-0.506785	23.5124	23.4068	23.1512	22.4797	2	23.1572
AURKA	Aurora kinase A	P97477	-0.457684	2	22.4077	23.5117	22.5399	21.172	23.3482
UBLCP1	Ubiquitin-like domain-containing CTD phosphatase 1	Q8BGR9	0.637266	22.8792	2	22.8653	2	2	23.5095
VPS39	Vam6/Vps39-like protein	Q8R5L3	-0.797468	22.588	23.5089	20.6541	21.8632	2	2
SNRPA1	U2 small nuclear ribonucleoprotein A'	P57784	-0.203638	20.4435	23.5037	2	21.9608	21.446	23.3116
DCXR	L-xylulose reductase	Q91X52	-21.372	23.3668	23.503	23.2334	2	2	2
CLCN7	H(+)/Cl(-) exchange transporter 7	O70496	-1.23981	23.0278	22.8324	23.5016	22.0547	20.7796	22.4313
FARSA	Phenylalanine--tRNA ligase alpha subunit	Q8C0C7	-0.895247	22.5376	23.4877	23.5011	21.8608	21.9045	22.9754
B4GALT2	Beta-1,4-galactosyltransferase 2	Q9Z2Y2	-21.0563	23.3872	21.667	23.5005	2	2	2
SLC27A4	Long-chain fatty acid transport protein 4	Q91VE0	-1.17927	22.0042	2	23.4975	20.6678	2	22.3702
MUG1	Murinoglobulin-1	P28665	-0.882789	2	23.0716	23.4926	21.4568	21.2276	23.4474
SGSM1	Small G protein signaling modulator 1	Q8BPQ7	0.494621	22.3631	22.9792	2	23.4918	2	22.8298
PMPCA	Mitochondrial-processing peptidase subunit alpha	Q9DC61	0.175951	22.2285	21.9923	23.4891	2	2	22.9053
RALB	Ras-related protein Ral-B	Q9JIW9	-0.330308	23.4868	22.9899	23.3508	2	22.2557	23.4317
HERC4	Probable E3 ubiquitin-protein ligase HERC4	Q6PAV2	-0.339331	2	23.4853	22.9793	22.8958	22.6736	23.1383
CDC37L1	Hsp90 co-chaperone Cdc37-like 1	Q9CZP7	-20.4014	21.1689	21.3047	23.4764	2	2	2
FTL1	Ferritin light chain 1	P29391	-1.10463	2	21.2665	23.4721	21.4497	19.007	22.6288
RBM14	RNA-binding protein 14	Q8C2Q3	0.734463	22.5685	21.7953	2	2	22.2061	23.4633
DOP1A	Protein dopey-1	Q8BL99	-1.08706	22.7793	22.8623	23.4565	21.9592	21.4518	22.378
ALYREF	THO complex subunit 4	O08583	-0.152842	22.9636	23.2612	23.3044	22.3133	23.1013	23.4561
GPAT2	Glycerol-3-phosphate acyltransferase 2, mitochondrial	Q14DK4	-0.406086	22.906	23.2267	23.223	2	21.1529	23.4535
SPTBN1	Spectrin beta chain, non-erythrocytic 1	Q62261	-0.286856	23.4032	22.7643	23.0635	22.7784	21.7174	23.4521
RPL36A	60S ribosomal protein L36a	P83882	-0.238433	22.8161	21.1549	23.4426	23.037	22.4586	21.7521
PDLIM7	PDZ and LIM domain protein 7	Q3TJD7	0.85956	2	21.6442	2	2	18.9411	23.4414
ABCB9	ABC-type oligopeptide transporter ABCB9	Q9JJ59	-0.42863	22.2582	22.6352	23.4408	22.8079	21.5615	22.6516
ACADL	Long-chain specific acyl-CoA dehydrogenase, mitochondrial	P51174	-0.445871	22.9984	23.0514	23.1341	22.6943	20.1561	23.4345
MARF1	Meiosis regulator and mRNA stability factor 1	Q8BJ34	1.31406	21.9772	2	2	23.0384	23.3715	23.4335
KIFBP	KIF-binding protein	Q6ZPU9	-1.34372	2	2	23.4282	22.6558	20.68	22.2688
PTGES2	Prostaglandin E synthase 2	Q8BWM0	-21.358	23.4245	23.2883	2	2	2	2
AGPAT5	1-acyl-sn-glycerol-3-phosphate acyltransferase epsilon	Q9D1E8	-0.0458311	22.873	22.7887	22.0541	2	20.2541	23.4173
SBF1	Myotubularin-related protein 5	Q6ZPE2	-0.453637	2	2	23.1442	22.4943	21.615	23.4154
[truncated: 61 more rows]
