# Supplementary material for: UHRF1 is essential for proper cytoplasmic architecture and function of mouse oocytes and derived embryos
Source: Life Sci Alliance. 2023 May 24;6(8):e202301904. doi: 10.26508/lsa.202301904 (PMC10209520; doi:10.26508/lsa.202301904)
Supplement: Supplementary file 6 [file LSA-2023-01904_TableS4.xlsx]

## Sheet: TableS4
Table 4 Proteins up-regulated in Uhrf1 KO FGOs.
Up-regulated proteins (≥ 2.0, n = 52) are listed in the order of intensity (abundance) in KO FGOs. The top 20 high-intensity proteins are above the bold line. Protein levels are shown in Log2 (signal intensity + 4).
Protein symbol	Protein name	UniProt ID	Log2 fold change	Control_1	Control_2	Control_3	KO_1	KO_2	KO_3
KRT76	Keratin, type II cytoskeletal 2 oral	Q3UV17	1.72491	28.5747	2	28.079	31.4183	27.5625	28.2547
CTTN	Src substrate cortactin	Q60598	2.09912	25.7939	25.5972	26.2993	29.4346	24.482	26.0918
NUP85	Nuclear pore complex protein Nup85	Q8R480	3.20359	2	2	24.2378	22.6398	22.1966	28.9961
SORBS2	Sorbin and SH3 domain-containing protein 2	Q3UTJ2	3.49294	23.5466	23.7583	23.27	21.4161	2	28.0169
GLRX	Glutaredoxin-1	Q9QUH0	1.11882	24.9322	25.1312	25.8419	23.5733	22.4175	27.9643
ARL8A	ADP-ribosylation factor-like protein 8A	Q8VEH3	1.10046	27.1099	26.4118	26.0597	2	2	27.6953
SLC30A3	Zinc transporter 3	P97441	1.88683	26.8615	21.2819	21.5477	27.1749	26.7877	27.6063
PMPCB	Mitochondrial-processing peptidase subunit beta	Q9CXT8	4.47317	22.0277	2	2	26.6202	20.401	27.4262
ETHE1	Persulfide dioxygenase ETHE1, mitochondrial	Q9DCM0	3.59117	24.3012	21.8525	22.9955	2	2	26.9743
NUP37	Nucleoporin Nup37	Q9CWU9	23.6999	2	2	2	26.8281	21.0157	25.3325
KRT14	Keratin, type I cytoskeletal 14	Q61781	1.09299	21.0577	2	25.2383	26.2359	23.2623	2
HM13	Minor histocompatibility antigen H13	Q9D8V0	1.0933	25.168	23.0869	24.3462	26.0947	24.848	25.3606
ATP5MG	ATP synthase subunit g, mitochondrial	Q9CPQ8	22.8647	2	2	2	23.5039	23.1189	26.0741
STRA6	Receptor for retinol uptake STRA6	O70491	1.75475	23.699	23.3349	22.1856	23.9808	23.6145	26.0266
HNRNPC	Heterogeneous nuclear ribonucleoproteins C1/C2	Q9Z204	1.88503	23.9544	22.5901	23.6305	25.9788	24.7013	25.1764
MCM6	DNA replication licensing factor MCM6	P97311	1.39134	22.7679	23.1828	24.08	24.7617	22.8552	25.6918
TLN1	Talin-1	P26039	2.06844	22.3433	21.3276	23.3022	24.5708	22.922	25.3869
TMEM135	Transmembrane protein 135	Q9CYV5	23.0086	2	2	2	25.236	24.1903	25.3446
FBL	rRNA 2'-O-methyltransferase fibrillarin	P35550	1.56335	23.2776	2	2	25.3362	23.3282	25.1513
SF3A1	Splicing factor 3A subunit 1	Q8K4Z5	2.98833	2	22.2954	22.2881	25.2801	2	2
SET	Protein SET	Q9EQU5	22.279	2	2	2	23.5498	23.5224	25.1309
CYRIB	CYFIP-related Rac1 interactor B	Q921M7	1.35451	21.9995	22.8407	24.1195	22.6018	24.9998	25.1262
DHRS1	Dehydrogenase/reductase SDR family member 1	Q99L04	1.85104	2	23.2746	21.8062	23.6889	2	25.114
FOCAD	Focadhesin	A2AKG8	1.14709	22.0326	23.6127	24.1193	24.9428	24.7349	24.1093
SCARB1	Scavenger receptor class B member 1	Q61009	2.45219	21.8782	2	2	24.1891	23.8499	24.7914
LASP1	LIM and SH3 domain protein 1	Q61792	1.22356	22.5914	21.6361	22.3119	24.6476	21.4015	22.3844
ATP5MF	ATP synthase subunit f, mitochondrial	P56135	21.8802	2	2	2	2	22.2865	24.6189
PRKAG1	5'-AMP-activated protein kinase subunit gamma-1	O54950	1.55998	21.2344	22.459	22.8369	22.6227	2	24.5433
FXYD6	FXYD domain-containing ion transport regulator 6	Q9D164	21.7788	2	2	2	22.1976	2	24.515
MBOAT7	Lysophospholipid acyltransferase 7	Q8CHK3	1.10181	2	21.0073	23.5344	22.7569	2	24.4869
LMAN2L	VIP36-like protein	P59481	1.78076	22.0832	22.9628	2	2	2	24.3698
ARFGAP3	ADP-ribosylation factor GTPase-activating protein 3	Q9D8S3	1.58803	21.6467	22.4539	22.1769	24.3503	2	22.5664
TMEM11	Transmembrane protein 11, mitochondrial	Q8BK08	21.6471	2	2	2	24.333	22.2933	2
TOMM40	Mitochondrial import receptor subunit TOM40 homolog	Q9QYA2	2.25781	21.6009	2	2	23.5676	2	24.1008
YARS1	Tyrosine--tRNA ligase, cytoplasmic	Q91WQ3	2.1118	21.5406	2	2	23.0444	24.0788	2
DAG1	Dystroglycan 1	Q62165	3.77407	2	19.801	2	2	22.8024	24.0756
WDR48	WD repeat-containing protein 48	Q8BH57	1.80869	20.9662	22.6113	22.006	23.5083	2	24.0735
NDUFAF7	Protein arginine methyltransferase NDUFAF7, mitochondrial	Q9CWG8	1.62905	2	20.2741	22.2202	20.9525	2	24.0195
ODR4	Protein odr-4 homolog	Q4PJX1	21.0129	2	2	2	22.6826	21.6806	23.8669
PIP4K2C	Phosphatidylinositol 5-phosphate 4-kinase type-2 gamma	Q91XU3	1.55135	21.3748	2	22.7991	23.8073	2	2
CHKB	Choline/ethanolamine kinase	O55229	1.10047	2	23.1199	22.0141	23.7366	2	23.8045
FDPS	Farnesyl pyrophosphate synthase	Q920E5	1.74564	22.5825	20.7765	22.1566	2	2	23.7649
WDR13	WD repeat-containing protein 13	Q91V09	1.13294	2	21.8387	22.4414	23.7352	22.1698	23.5629
DNAJC10	DnaJ homolog subfamily C member 10	Q9DC23	1.44622	22.612	21.1184	21.0301	23.7274	21.8177	23.5071
LAPTM4B	Lysosomal-associated transmembrane protein 4B	Q91XQ6	21.3264	2	2	2	22.9461	2	23.6271
BTBD1	BTB/POZ domain-containing protein 1	P58544	20.9778	2	2	2	23.6173	21.801	2
TIMM17A	Mitochondrial import inner membrane translocase subunit Tim17-A	Q9Z0V8	1.40014	22.5759	2	21.5626	2	2	23.5566
MARF1	Meiosis regulator and mRNA stability factor 1	Q8BJ34	1.31406	21.9772	2	2	23.0384	23.3715	23.4335
SLC12A2	Solute carrier family 12 member 2	P55012	20.8019	2	2	2	23.3711	2	21.8484
RUBCN	Run domain Beclin-1-interacting and cysteine-rich domain-containing protein	Q80U62	21.2402	2	2	2	23.1416	2	23.3326
PTPN1	Tyrosine-protein phosphatase non-receptor type 1	P35821	21.1647	2	2	2	23.0168	2	23.2989
PTPRA	Receptor-type tyrosine-protein phosphatase alpha	P18052	20.62	2	2	2	23.2697	21.406	2
