# Supplementary material for: UHRF1 is essential for proper cytoplasmic architecture and function of mouse oocytes and derived embryos
Source: Life Sci Alliance. 2023 May 24;6(8):e202301904. doi: 10.26508/lsa.202301904 (PMC10209520; doi:10.26508/lsa.202301904)
Supplement: Supplementary file 8 [file LSA-2023-01904_TableS6.xlsx]

## Sheet: TableS6
Table 6 Transcript and protein levels of SCMC components in control and Uhrf1 KO FGOs.
SCMC components	Transcript level				Protein level
	Ave. of Log2 (CPM + 4)		Log2 fold change		Ave. of Log2 (signal intensity + 4)		Log2 fold change
	Control	KO			Control	KO
NLRP5	14.9158	15.1583	0.253185		33.7552	33.0238	-0.662298
PADI6	15.5043	15.5341	0.0383572		35.4012	34.6667	-0.677536
TLE6	14.7908	14.8342	0.0455955		33.0462	32.0147	-0.901456
KHDC3	12.8414	13.0865	0.247183		32.6238	31.906	-0.669711
OOEP	13.1342	12.978	-0.15628		31.2079	30.2296	-0.789651
NLRP4F	14.7657	14.9316	0.16924		31.7393	30.8304	-0.826092
ZBED3	17.1702	17.4544	0.285567		29.8737	28.9822	-0.72596
NLRP2	12.8063	12.7738	-0.0319401		N.D.	N.D.	N.D.
N.D., not detected
